# Supplementary material
Source: publisher figshare collection journal article supplement (https://acs.figshare.com/ndownloader/files/8563567)
Supplement: Supplementary file 1 [file 8563567]

data_3s_TW_cmrnpy

_audit_creation_method            'SHELXL-2014/7'
_shelx_SHELXL_version_number      '2014/7'
_chemical_name_systematic         ?
_chemical_name_common             ?
_chemical_melting_point           ?
_chemical_formula_moiety          ?
_chemical_formula_sum
 'C17 H11 N O2'
_chemical_formula_weight          261.27

loop_
 _atom_type_symbol
 _atom_type_description
 _atom_type_scat_dispersion_real
 _atom_type_scat_dispersion_imag
 _atom_type_scat_source
 'C'  'C'   0.0033   0.0016
 'International Tables Vol C Tables 4.2.6.8 and 6.1.1.4'
 'H'  'H'   0.0000   0.0000
 'International Tables Vol C Tables 4.2.6.8 and 6.1.1.4'
 'N'  'N'   0.0061   0.0033
 'International Tables Vol C Tables 4.2.6.8 and 6.1.1.4'
 'O'  'O'   0.0106   0.0060
 'International Tables Vol C Tables 4.2.6.8 and 6.1.1.4'

_space_group_crystal_system       triclinic
_space_group_IT_number            2
_space_group_name_H-M_alt         'P -1'
_space_group_name_Hall            '-P 1'

_shelx_space_group_comment
;
The symmetry employed for this shelxl refinement is uniquely defined
by the following loop, which should always be used as a source of
symmetry information in preference to the above space-group names.
They are only intended as comments.
;

loop_
 _space_group_symop_operation_xyz
 'x, y, z'
 '-x, -y, -z'

_cell_length_a                    4.8941(12)
_cell_length_b                    11.540(3)
_cell_length_c                    11.594(3)
_cell_angle_alpha                 70.969(2)
_cell_angle_beta                  85.557(3)
_cell_angle_gamma                 80.892(3)
_cell_volume                      611.0(3)
_cell_formula_units_Z             2
_cell_measurement_temperature     100(2)

_cell_measurement_reflns_used     2997

_cell_measurement_theta_min       2.19

_cell_measurement_theta_max       27.95


_exptl_crystal_description        prism

_exptl_crystal_colour             colourless

_exptl_crystal_density_meas       ?
_exptl_crystal_density_method     ?
_exptl_crystal_density_diffrn     1.420
_exptl_crystal_F_000              272
_exptl_transmission_factor_min    ?
_exptl_transmission_factor_max    ?
_exptl_crystal_size_max           0.320
_exptl_crystal_size_mid           0.150
_exptl_crystal_size_min           0.070
_exptl_absorpt_coefficient_mu     0.094
_shelx_estimated_absorpt_T_min    0.971
_shelx_estimated_absorpt_T_max    0.993
_exptl_absorpt_correction_type    multi-scan

_exptl_absorpt_correction_T_min   0.915

_exptl_absorpt_correction_T_max   0.993

_exptl_absorpt_process_details    'SADABS 2015/4'

_exptl_absorpt_special_details    ?
_diffrn_ambient_temperature       100(2)
_diffrn_radiation_wavelength      0.71073
_diffrn_radiation_type            MoK\a
_diffrn_source                    ?
_diffrn_measurement_device_type   'Bruker APEX-II CCD'

_diffrn_measurement_method        '\f and \w scans'

_diffrn_detector_area_resol_mean  ?

_diffrn_reflns_number             6633
_diffrn_reflns_av_unetI/netI      0.0228
_diffrn_reflns_av_R_equivalents   0.0179
_diffrn_reflns_limit_h_min        -6
_diffrn_reflns_limit_h_max        6
_diffrn_reflns_limit_k_min        -15
_diffrn_reflns_limit_k_max        15
_diffrn_reflns_limit_l_min        -15
_diffrn_reflns_limit_l_max        14
_diffrn_reflns_theta_min          1.859
_diffrn_reflns_theta_max          28.029
_diffrn_reflns_theta_full         25.242
_diffrn_measured_fraction_theta_max   0.910
_diffrn_measured_fraction_theta_full  0.991
_diffrn_reflns_Laue_measured_fraction_max    0.910
_diffrn_reflns_Laue_measured_fraction_full   0.991
_diffrn_reflns_point_group_measured_fraction_max   0.910
_diffrn_reflns_point_group_measured_fraction_full  0.991
_reflns_number_total              2705
_reflns_number_gt                 2308
_reflns_threshold_expression      'I > 2\s(I)'
_reflns_Friedel_coverage          0.000
_reflns_Friedel_fraction_max      .
_reflns_Friedel_fraction_full     .

_reflns_special_details
;
 Reflections were merged by SHELXL according to the crystal
 class for the calculation of statistics and refinement.

 _reflns_Friedel_fraction is defined as the number of unique
 Friedel pairs measured divided by the number that would be
 possible theoretically, ignoring centric projections and
 systematic absences.
;

_computing_data_collection        'Bruker APEX2'
_computing_cell_refinement        'Bruker SAINT'
_computing_data_reduction         'Bruker SAINT'
_computing_structure_solution     'SHELXT (Sheldrick, 2015)'

_computing_structure_refinement 'SHELXL-2014/7 (Sheldrick, 2014)'
_computing_molecular_graphics 'Yadokari-XG 2009 (Wakita Nemoto et al., 2009)'

_computing_publication_material
;Yadokari-XG 2009 (Wakita,Nemoto et al., 2009)
;

_refine_special_details           ?
_refine_ls_structure_factor_coef  Fsqd
_refine_ls_matrix_type            full
_refine_ls_weighting_scheme       calc
_refine_ls_weighting_details
'w=1/[\s^2^(Fo^2^)+(0.0467P)^2^+0.2520P] where P=(Fo^2^+2Fc^2^)/3'
_atom_sites_solution_primary      ?
_atom_sites_solution_secondary    ?
_atom_sites_solution_hydrogens    mixed
_refine_ls_hydrogen_treatment     mixed

_refine_ls_extinction_method      none
_refine_ls_extinction_coef        .
_refine_ls_number_reflns          2705
_refine_ls_number_parameters      239
_refine_ls_number_restraints      30
_refine_ls_R_factor_all           0.0479
_refine_ls_R_factor_gt            0.0409
_refine_ls_wR_factor_ref          0.1048
_refine_ls_wR_factor_gt           0.0996
_refine_ls_goodness_of_fit_ref    1.044
_refine_ls_restrained_S_all       1.039
_refine_ls_shift/su_max           0.000
_refine_ls_shift/su_mean          0.000

loop_
 _atom_site_label
 _atom_site_type_symbol
 _atom_site_fract_x
 _atom_site_fract_y
 _atom_site_fract_z
 _atom_site_U_iso_or_equiv
 _atom_site_adp_type
 _atom_site_occupancy
 _atom_site_site_symmetry_order
 _atom_site_calc_flag
 _atom_site_refinement_flags_posn
 _atom_site_refinement_flags_adp
 _atom_site_refinement_flags_occupancy
 _atom_site_disorder_assembly
 _atom_site_disorder_group
C1B C 0.372(3) 0.4873(15) 0.7951(15) 0.012(2) Uani 0.500(2) 1 d . . P A 2
C1A C 0.392(3) 0.4692(15) 0.8112(15) 0.016(2) Uani 0.500(2) 1 d . . P A 1
C2B C 0.6337(5) 0.5230(2) 0.7824(2) 0.0156(5) Uani 0.500(2) 1 d . . P A 2
H2B H 0.7879 0.4629 0.7889 0.019 Uiso 0.500(2) 1 calc R U P A 2
C3B C 0.6737(5) 0.6449(2) 0.7603(2) 0.0181(5) Uani 0.500(2) 1 d . . P A 2
H3B H 0.8490 0.6690 0.7467 0.022 Uiso 0.500(2) 1 calc R U P A 2
C4B C 0.442(3) 0.7263(17) 0.7597(13) 0.027(3) Uani 0.500(2) 1 d . . P A 2
H4B H 0.4686 0.8074 0.7483 0.032 Uiso 0.500(2) 1 calc R U P A 2
C5B C 0.1824(5) 0.7039(2) 0.7733(2) 0.0202(6) Uani 0.500(2) 1 d . . P A 2
H5B H 0.0346 0.7663 0.7699 0.024 Uiso 0.500(2) 1 calc R U P A 2
C6B C 0.1424(5) 0.5823(2) 0.7930(2) 0.0170(5) Uani 0.500(2) 1 d . . P A 2
H6B H -0.0365 0.5620 0.8051 0.020 Uiso 0.500(2) 1 calc R U P A 2
C2A C 0.3929(5) 0.5419(2) 0.6837(2) 0.0141(5) Uani 0.500(2) 1 d . . P A 1
H2A H 0.3827 0.5051 0.6240 0.017 Uiso 0.500(2) 1 calc R U P A 1
C3A C 0.4089(5) 0.6676(2) 0.6514(2) 0.0150(5) Uani 0.500(2) 1 d . U P A 1
H3A H 0.4054 0.7136 0.5689 0.018 Uiso 0.500(2) 1 calc R U P A 1
C4A C 0.431(3) 0.7310(16) 0.7377(14) 0.0177(17) Uani 0.500(2) 1 d . U P A 1
H4A H 0.4460 0.8148 0.7154 0.021 Uiso 0.500(2) 1 calc R U P A 1
C5A C 0.4264(5) 0.6509(2) 0.8624(2) 0.0165(5) Uani 0.500(2) 1 d . U P A 1
H5A H 0.4322 0.6856 0.9240 0.020 Uiso 0.500(2) 1 calc R U P A 1
C6A C 0.4139(5) 0.5248(2) 0.8955(2) 0.0146(5) Uani 0.500(2) 1 d . . P A 1
H6A H 0.4208 0.4776 0.9776 0.018 Uiso 0.500(2) 1 calc R U P A 1
C7 C 0.8286(3) 0.31939(14) 0.63215(14) 0.0334(4) Uani 1 1 d . . . . .
H7 H 0.7916 0.4002 0.6343 0.040 Uiso 1 1 calc R U . . .
C8 C 1.0323(4) 0.28986(16) 0.55305(16) 0.0465(5) Uani 1 1 d . . . . .
H8 H 1.1306 0.3510 0.5027 0.056 Uiso 1 1 calc R U . . .
C9 C 1.0923(3) 0.17027(14) 0.54773(12) 0.0289(3) Uani 1 1 d . . . . .
H9 H 1.2308 0.1512 0.4945 0.035 Uiso 1 1 calc R U . . .
C10 C 0.9460(3) 0.07986(12) 0.62148(11) 0.0206(3) Uani 1 1 d . . . . .
H10 H 0.9846 -0.0007 0.6186 0.025 Uiso 1 1 calc R U . . .
O1 O 0.27447(19) -0.06357(8) 0.90175(9) 0.0259(2) Uani 1 1 d . . . . .
O2 O 0.60256(19) 0.01285(8) 0.76923(9) 0.0269(2) Uani 1 1 d . . . . .
N1 N 0.1348(2) 0.17966(11) 0.94026(10) 0.0231(3) Uani 1 1 d . . . . .
H1 H 0.014(3) 0.1320(15) 0.9918(15) 0.028 Uiso 1 1 d . U . . .
C11 C 0.4614(2) 0.24815(12) 0.79726(10) 0.0171(3) Uani 1 1 d . . . . .
C12 C 0.3298(2) 0.14648(12) 0.86201(11) 0.0183(3) Uani 1 1 d . . . . .
C13 C 0.6771(2) 0.22989(12) 0.70898(11) 0.0175(3) Uani 1 1 d . . . . .
C14 C 0.3892(2) 0.02682(12) 0.84953(11) 0.0209(3) Uani 1 1 d . . . . .
C15 C 0.7402(2) 0.11033(11) 0.70017(11) 0.0185(3) Uani 1 1 d . . . . .
C16 C 0.3372(3) 0.34806(13) 0.83871(11) 0.0218(3) Uani 1 1 d . . . . .
C17 C 0.1398(3) 0.29970(14) 0.92690(13) 0.0305(4) Uani 1 1 d . . . . .
H17 H 0.0266 0.3442 0.9707 0.037 Uiso 1 1 calc R U . . .

loop_
 _atom_site_aniso_label
 _atom_site_aniso_U_11
 _atom_site_aniso_U_22
 _atom_site_aniso_U_33
 _atom_site_aniso_U_23
 _atom_site_aniso_U_13
 _atom_site_aniso_U_12
C1B 0.018(3) 0.012(3) 0.009(4) -0.001(3) -0.001(2) -0.011(3)
C1A 0.012(2) 0.026(6) 0.005(3) 0.000(3) 0.001(2) 0.000(2)
C2B 0.0143(11) 0.0183(12) 0.0142(11) -0.0056(9) 0.0022(9) -0.0028(9)
C3B 0.0171(12) 0.0228(13) 0.0168(12) -0.0080(9) 0.0036(9) -0.0086(9)
C4B 0.035(4) 0.022(4) 0.018(5) -0.003(4) 0.007(3) -0.001(2)
C5B 0.0195(13) 0.0172(12) 0.0221(13) -0.0064(10) 0.0063(10) -0.0012(9)
C6B 0.0146(11) 0.0189(12) 0.0174(12) -0.0061(9) 0.0017(9) -0.0024(9)
C2A 0.0129(10) 0.0167(11) 0.0135(11) -0.0062(9) 0.0025(8) -0.0027(8)
C3A 0.0120(10) 0.0156(11) 0.0154(11) -0.0025(9) 0.0012(8) -0.0025(8)
C4A 0.012(2) 0.016(2) 0.014(4) 0.008(2) 0.005(2) 0.0002(14)
C5A 0.0140(11) 0.0207(12) 0.0185(12) -0.0113(10) 0.0039(9) -0.0047(9)
C6A 0.0134(11) 0.0176(12) 0.0131(11) -0.0055(9) 0.0018(8) -0.0022(8)
C7 0.0486(9) 0.0309(8) 0.0321(8) -0.0212(6) 0.0236(7) -0.0265(7)
C8 0.0707(12) 0.0385(9) 0.0440(9) -0.0270(8) 0.0441(9) -0.0394(9)
C9 0.0366(8) 0.0350(8) 0.0220(7) -0.0160(6) 0.0150(6) -0.0181(6)
C10 0.0204(6) 0.0220(6) 0.0192(6) -0.0055(5) -0.0006(5) -0.0046(5)
O1 0.0217(5) 0.0215(5) 0.0276(5) 0.0017(4) 0.0054(4) -0.0061(4)
O2 0.0196(5) 0.0178(5) 0.0339(5) 0.0020(4) 0.0106(4) -0.0024(4)
N1 0.0256(6) 0.0323(6) 0.0165(5) -0.0101(5) 0.0082(4) -0.0179(5)
C11 0.0138(5) 0.0246(6) 0.0119(5) -0.0024(5) -0.0015(4) -0.0067(5)
C12 0.0143(5) 0.0261(7) 0.0125(5) -0.0019(5) -0.0004(4) -0.0065(5)
C13 0.0156(6) 0.0253(6) 0.0126(5) -0.0050(5) -0.0004(4) -0.0079(5)
C14 0.0142(6) 0.0237(6) 0.0182(6) 0.0024(5) 0.0007(5) -0.0036(5)
C15 0.0150(6) 0.0203(6) 0.0163(6) 0.0010(5) -0.0006(5) -0.0058(5)
C16 0.0234(6) 0.0325(7) 0.0159(6) -0.0124(5) 0.0057(5) -0.0153(5)
C17 0.0388(8) 0.0408(8) 0.0250(7) -0.0227(6) 0.0173(6) -0.0261(7)

_geom_special_details
;
 All esds (except the esd in the dihedral angle between two l.s. planes)
 are estimated using the full covariance matrix.  The cell esds are taken
 into account individually in the estimation of esds in distances, angles
 and torsion angles; correlations between esds in cell parameters are only
 used when they are defined by crystal symmetry.  An approximate (isotropic)
 treatment of cell esds is used for estimating esds involving l.s. planes.
;

loop_
 _geom_bond_atom_site_label_1
 _geom_bond_atom_site_label_2
 _geom_bond_distance
 _geom_bond_site_symmetry_2
 _geom_bond_publ_flag
C1B C2B 1.389(13) . ?
C1B C6B 1.436(17) . ?
C1B C16 1.553(15) . ?
C1A C6A 1.352(14) . ?
C1A C16 1.394(15) . ?
C1A C2A 1.442(17) . ?
C2B C3B 1.388(3) . ?
C3B C4B 1.350(18) . ?
C4B C5B 1.325(16) . ?
C5B C6B 1.390(3) . ?
C2A C3A 1.389(3) . ?
C3A C4A 1.438(18) . ?
C4A C5A 1.440(15) . ?
C5A C6A 1.389(3) . ?
C7 C8 1.381(2) . ?
C7 C13 1.3964(17) . ?
C8 C9 1.385(2) . ?
C9 C10 1.3756(18) . ?
C10 C15 1.3876(18) . ?
O1 C14 1.2210(15) . ?
O2 C14 1.3702(15) . ?
O2 C15 1.3888(14) . ?
N1 C17 1.3467(18) . ?
N1 C12 1.3625(16) . ?
C11 C12 1.3945(17) . ?
C11 C16 1.4226(18) . ?
C11 C13 1.4525(16) . ?
C12 C14 1.4174(19) . ?
C13 C15 1.4005(18) . ?
C16 C17 1.3914(18) . ?

loop_
 _geom_angle_atom_site_label_1
 _geom_angle_atom_site_label_2
 _geom_angle_atom_site_label_3
 _geom_angle
 _geom_angle_site_symmetry_1
 _geom_angle_site_symmetry_3
 _geom_angle_publ_flag
C2B C1B C6B 116.2(9) . . ?
C2B C1B C16 120.5(12) . . ?
C6B C1B C16 121.8(9) . . ?
C6A C1A C16 124.3(13) . . ?
C6A C1A C2A 119.0(11) . . ?
C16 C1A C2A 116.3(10) . . ?
C3B C2B C1B 122.5(7) . . ?
C4B C3B C2B 115.9(8) . . ?
C5B C4B C3B 127.5(15) . . ?
C4B C5B C6B 116.5(9) . . ?
C5B C6B C1B 121.2(5) . . ?
C3A C2A C1A 119.0(6) . . ?
C2A C3A C4A 123.9(6) . . ?
C3A C4A C5A 112.9(11) . . ?
C6A C5A C4A 123.6(7) . . ?
C1A C6A C5A 121.5(8) . . ?
C8 C7 C13 121.10(13) . . ?
C7 C8 C9 120.82(13) . . ?
C10 C9 C8 119.69(13) . . ?
C9 C10 C15 119.21(12) . . ?
C14 O2 C15 122.54(10) . . ?
C17 N1 C12 107.86(11) . . ?
C12 C11 C16 106.58(11) . . ?
C12 C11 C13 117.12(11) . . ?
C16 C11 C13 136.29(11) . . ?
N1 C12 C11 109.38(11) . . ?
N1 C12 C14 124.96(11) . . ?
C11 C12 C14 125.66(12) . . ?
C7 C13 C15 116.66(11) . . ?
C7 C13 C11 126.61(12) . . ?
C15 C13 C11 116.72(11) . . ?
O1 C14 O2 117.23(12) . . ?
O1 C14 C12 127.81(12) . . ?
O2 C14 C12 114.96(10) . . ?
C10 C15 O2 114.61(11) . . ?
C10 C15 C13 122.50(11) . . ?
O2 C15 C13 122.89(11) . . ?
C17 C16 C1A 122.2(6) . . ?
C17 C16 C11 105.38(12) . . ?
C1A C16 C11 132.3(6) . . ?
C17 C16 C1B 122.5(6) . . ?
C11 C16 C1B 131.9(6) . . ?
N1 C17 C16 110.80(12) . . ?

loop_
 _geom_torsion_atom_site_label_1
 _geom_torsion_atom_site_label_2
 _geom_torsion_atom_site_label_3
 _geom_torsion_atom_site_label_4
 _geom_torsion
 _geom_torsion_site_symmetry_1
 _geom_torsion_site_symmetry_2
 _geom_torsion_site_symmetry_3
 _geom_torsion_site_symmetry_4
 _geom_torsion_publ_flag
C6B C1B C2B C3B -4.4(15) . . . . ?
C16 C1B C2B C3B -170.8(6) . . . . ?
C1B C2B C3B C4B 4.1(11) . . . . ?
C2B C3B C4B C5B -2.6(17) . . . . ?
C3B C4B C5B C6B 1.4(17) . . . . ?
C4B C5B C6B C1B -1.6(11) . . . . ?
C2B C1B C6B C5B 3.0(15) . . . . ?
C16 C1B C6B C5B 169.3(7) . . . . ?
C6A C1A C2A C3A -1.6(14) . . . . ?
C16 C1A C2A C3A 171.4(7) . . . . ?
C1A C2A C3A C4A 1.3(10) . . . . ?
C2A C3A C4A C5A -1.6(12) . . . . ?
C3A C4A C5A C6A 2.5(11) . . . . ?
C16 C1A C6A C5A -170.0(9) . . . . ?
C2A C1A C6A C5A 2.5(15) . . . . ?
C4A C5A C6A C1A -3.1(10) . . . . ?
C13 C7 C8 C9 0.0(3) . . . . ?
C7 C8 C9 C10 0.5(3) . . . . ?
C8 C9 C10 C15 0.0(2) . . . . ?
C17 N1 C12 C11 -0.09(15) . . . . ?
C17 N1 C12 C14 179.56(12) . . . . ?
C16 C11 C12 N1 -0.28(14) . . . . ?
C13 C11 C12 N1 179.96(10) . . . . ?
C16 C11 C12 C14 -179.93(12) . . . . ?
C13 C11 C12 C14 0.31(18) . . . . ?
C8 C7 C13 C15 -0.8(2) . . . . ?
C8 C7 C13 C11 179.00(15) . . . . ?
C12 C11 C13 C7 177.91(13) . . . . ?
C16 C11 C13 C7 -1.8(2) . . . . ?
C12 C11 C13 C15 -2.24(16) . . . . ?
C16 C11 C13 C15 178.09(13) . . . . ?
C15 O2 C14 O1 176.88(11) . . . . ?
C15 O2 C14 C12 -3.44(17) . . . . ?
N1 C12 C14 O1 2.6(2) . . . . ?
C11 C12 C14 O1 -177.83(12) . . . . ?
N1 C12 C14 O2 -177.07(11) . . . . ?
C11 C12 C14 O2 2.53(18) . . . . ?
C9 C10 C15 O2 179.13(11) . . . . ?
C9 C10 C15 C13 -0.92(19) . . . . ?
C14 O2 C15 C10 -178.43(11) . . . . ?
C14 O2 C15 C13 1.62(18) . . . . ?
C7 C13 C15 C10 1.32(19) . . . . ?
C11 C13 C15 C10 -178.54(11) . . . . ?
C7 C13 C15 O2 -178.73(12) . . . . ?
C11 C13 C15 O2 1.41(17) . . . . ?
C6A C1A C16 C17 42.6(16) . . . . ?
C2A C1A C16 C17 -130.0(8) . . . . ?
C6A C1A C16 C11 -132.9(9) . . . . ?
C2A C1A C16 C11 54.4(15) . . . . ?
C12 C11 C16 C17 0.53(14) . . . . ?
C13 C11 C16 C17 -179.78(14) . . . . ?
C12 C11 C16 C1A 176.6(10) . . . . ?
C13 C11 C16 C1A -3.7(10) . . . . ?
C12 C11 C16 C1B -173.7(8) . . . . ?
C13 C11 C16 C1B 5.9(8) . . . . ?
C2B C1B C16 C17 134.9(8) . . . . ?
C6B C1B C16 C17 -30.8(14) . . . . ?
C2B C1B C16 C11 -51.7(14) . . . . ?
C6B C1B C16 C11 142.6(7) . . . . ?
C12 N1 C17 C16 0.44(16) . . . . ?
C1A C16 C17 N1 -177.2(8) . . . . ?
C11 C16 C17 N1 -0.61(16) . . . . ?
C1B C16 C17 N1 174.3(7) . . . . ?

_refine_diff_density_max    0.223
_refine_diff_density_min   -0.423
_refine_diff_density_rms    0.042

_shelx_res_file
;

    cmrnpy.res created by SHELXL-2014/7

TITL cmrnpy_a.res in P-1
REM  Yadorkari-X generated
CELL 0.71073 4.8941 11.5400 11.5945 70.9690 85.5570 80.8920
ZERR 2.0 0.0012 0.0030 0.0029 0.0020 0.0030 0.0030
LATT 1
REM  SPGR P-1 triclinic
SFAC C H N O
UNIT 34 22 2 4
SIZE 0.07 0.15 0.32
TEMP 0.0
L.S. 10
FMAP 2
PLAN -20
ACTA
CONF
LIST 4
OMIT    1    0    2
OMIT   -1    1    4
OMIT    1    3    0
OMIT    0    1    0
OMIT    3    3    9
OMIT    0   -3    1
OMIT    1    3    1
OMIT    0   12    6

SIMU 0.01 0.01 1.7 C3A  C4A  C5A
ISOR 1.5 0.01 C3A  C4A  C5A

WGHT    0.046700    0.252000
FVAR       0.31999   0.50026
PART 2
C1B   1    0.372047    0.487321    0.795116   -21.00000    0.01815    0.01178 =
         0.00868   -0.00145   -0.00148   -0.01080
PART 1
C1A   1    0.392051    0.469213    0.811151    21.00000    0.01169    0.02634 =
         0.00486    0.00040    0.00118    0.00017
PART 2
C2B   1    0.633675    0.522977    0.782372   -21.00000    0.01431    0.01834 =
         0.01424   -0.00564    0.00222   -0.00279
AFIX  43
H2B   2    0.787920    0.462925    0.788886   -21.00000   -1.20000
AFIX   0
C3B   1    0.673663    0.644873    0.760278   -21.00000    0.01713    0.02275 =
         0.01682   -0.00796    0.00360   -0.00855
AFIX  43
H3B   2    0.849002    0.669010    0.746735   -21.00000   -1.20000
AFIX   0
C4B   1    0.442389    0.726258    0.759653   -21.00000    0.03506    0.02209 =
         0.01825   -0.00291    0.00667   -0.00068
AFIX  43
H4B   2    0.468553    0.807369    0.748317   -21.00000   -1.20000
AFIX   0
C5B   1    0.182443    0.703892    0.773329   -21.00000    0.01952    0.01723 =
         0.02215   -0.00637    0.00633   -0.00122
AFIX  43
H5B   2    0.034576    0.766308    0.769915   -21.00000   -1.20000
AFIX   0
C6B   1    0.142399    0.582261    0.793042   -21.00000    0.01460    0.01890 =
         0.01738   -0.00606    0.00165   -0.00241
AFIX  43
H6B   2   -0.036450    0.561999    0.805111   -21.00000   -1.20000
PART 1
AFIX   0
C2A   1    0.392852    0.541870    0.683709    21.00000    0.01290    0.01667 =
         0.01353   -0.00618    0.00253   -0.00265
AFIX  43
H2A   2    0.382738    0.505083    0.624034    21.00000   -1.20000
AFIX   0
C3A   1    0.408947    0.667596    0.651367    21.00000    0.01195    0.01564 =
         0.01540   -0.00251    0.00123   -0.00254
AFIX  43
H3A   2    0.405435    0.713564    0.568896    21.00000   -1.20000
AFIX   0
C4A   1    0.430711    0.730955    0.737705    21.00000    0.01157    0.01617 =
         0.01399    0.00838    0.00514    0.00019
AFIX  43
H4A   2    0.445984    0.814777    0.715399    21.00000   -1.20000
AFIX   0
C5A   1    0.426367    0.650942    0.862359    21.00000    0.01404    0.02072 =
         0.01852   -0.01134    0.00388   -0.00471
AFIX  43
H5A   2    0.432224    0.685583    0.924019    21.00000   -1.20000
AFIX   0
C6A   1    0.413907    0.524838    0.895514    21.00000    0.01341    0.01755 =
         0.01308   -0.00553    0.00178   -0.00223
AFIX  43
H6A   2    0.420751    0.477596    0.977599    21.00000   -1.20000
PART 0
AFIX   0
C7    1    0.828582    0.319391    0.632151    11.00000    0.04857    0.03089 =
         0.03209   -0.02122    0.02365   -0.02648
AFIX  43
H7    2    0.791591    0.400241    0.634301    11.00000   -1.20000
AFIX   0
C8    1    1.032344    0.289860    0.553049    11.00000    0.07068    0.03848 =
         0.04397   -0.02703    0.04409   -0.03941
AFIX  43
H8    2    1.130555    0.351011    0.502719    11.00000   -1.20000
AFIX   0
C9    1    1.092304    0.170270    0.547726    11.00000    0.03658    0.03496 =
         0.02203   -0.01602    0.01499   -0.01811
AFIX  43
H9    2    1.230834    0.151194    0.494539    11.00000   -1.20000
AFIX   0
C10   1    0.945982    0.079860    0.621478    11.00000    0.02040    0.02201 =
         0.01922   -0.00554   -0.00064   -0.00463
AFIX  43
H10   2    0.984554   -0.000720    0.618633    11.00000   -1.20000
AFIX   0
O1    4    0.274470   -0.063575    0.901749    11.00000    0.02166    0.02149 =
         0.02759    0.00174    0.00539   -0.00607
O2    4    0.602559    0.012851    0.769232    11.00000    0.01956    0.01781 =
         0.03389    0.00203    0.01063   -0.00237
N1    3    0.134845    0.179664    0.940259    11.00000    0.02556    0.03229 =
         0.01645   -0.01011    0.00824   -0.01794
H1    2    0.013921    0.131985    0.991848    11.00000   -1.20000
C11   1    0.461359    0.248146    0.797258    11.00000    0.01376    0.02464 =
         0.01190   -0.00241   -0.00149   -0.00667
C12   1    0.329754    0.146484    0.862011    11.00000    0.01426    0.02614 =
         0.01245   -0.00189   -0.00035   -0.00646
C13   1    0.677119    0.229887    0.708977    11.00000    0.01559    0.02527 =
         0.01264   -0.00495   -0.00045   -0.00791
C14   1    0.389166    0.026823    0.849531    11.00000    0.01421    0.02374 =
         0.01819    0.00238    0.00075   -0.00361
C15   1    0.740156    0.110327    0.700166    11.00000    0.01499    0.02028 =
         0.01631    0.00100   -0.00064   -0.00576
C16   1    0.337231    0.348062    0.838711    11.00000    0.02337    0.03248 =
         0.01594   -0.01242    0.00570   -0.01533
C17   1    0.139805    0.299698    0.926902    11.00000    0.03885    0.04077 =
         0.02498   -0.02266    0.01730   -0.02614
AFIX  43
H17   2    0.026635    0.344226    0.970681    11.00000   -1.20000

AFIX   0
HKLF 4 1 1 0 0 0 1 0 0 0 1

REM  cmrnpy_a.res in P-1
REM R1 =  0.0409 for    2308 Fo > 4sig(Fo)  and  0.0479 for all    2705 data
REM    239 parameters refined using     30 restraints

END

WGHT      0.0467      0.2520

REM Highest difference peak  0.223,  deepest hole -0.423,  1-sigma level  0.042
Q1    1   1.0207  0.3833  0.4670  11.00000  0.05    0.22
Q2    1   0.7007  0.2822  0.6430  11.00000  0.05    0.21
Q3    1   0.7482  0.1626  0.7148  11.00000  0.05    0.21
Q4    1   0.8830  0.0948  0.6764  11.00000  0.05    0.19
Q5    1   0.5855  0.2424  0.7577  11.00000  0.05    0.19
Q6    1   0.5355  0.2528  0.7329  11.00000  0.05    0.19
Q7    1   1.0628  0.1198  0.6052  11.00000  0.05    0.19
Q8    1   0.4185  0.1911  0.8388  11.00000  0.05    0.19
Q9    1   0.7935  0.2659  0.6882  11.00000  0.05    0.19
Q10   1   1.0808  0.2771  0.5759  11.00000  0.05    0.19
Q11   1   1.0863  0.2469  0.5700  11.00000  0.05    0.18
Q12   1   0.6762  0.4405  0.6007  11.00000  0.05    0.18
Q13   1   0.8701  0.3100  0.5579  11.00000  0.05    0.18
Q14   1   0.9637  0.3199  0.5094  11.00000  0.05    0.17
Q15   1   0.8591  0.3795  0.6705  11.00000  0.05    0.17
Q16   1   0.9907  0.2230  0.5163  11.00000  0.05    0.17
Q17   1   0.7657  0.1152  0.6234  11.00000  0.05    0.17
Q18   1   0.2786  0.3186  0.9005  11.00000  0.05    0.16
Q19   1   0.4351  0.3051  0.8124  11.00000  0.05    0.16
Q20   1   0.1739  0.3448  0.8576  11.00000  0.05    0.16
;
_shelx_res_checksum   78614

_shelx_hkl_file
;
  -1   0   0   86.56    1.28
  -1   0   0   88.96    1.31
  -1   0   0   87.98    1.32
   1   0   0   90.40    1.36
  -2   0   0    0.06    0.05
  -2   0   0    0.10    0.04
   2   0   0    0.10    0.03
  -3   0   0   18.26    0.48
  -3   0   0   19.98    0.43
   3   0   0   19.90    0.40
   3   0   0   20.92    0.48
  -4   0   0   33.30    0.78
   4   0   0   32.81    0.73
  -5   0   0    0.82    0.15
   5   0   0    0.97    0.15
  -6   0   0    0.72    0.18
   6   0   0    0.79    0.15
   6  -1   0    2.96    0.30
  -6   1   0    3.37    0.34
   5  -1   0   12.96    0.44
  -5   1   0   12.66    0.50
   4  -1   0   20.36    0.53
  -4   1   0   19.67    0.56
   3  -1   0   22.63    0.51
   3  -1   0   23.13    0.43
  -3   1   0   22.81    0.52
  -3   1   0   23.56    0.55
   2  -1   0    3.93    0.11
   2  -1   0    4.07    0.15
  -2   1   0    3.72    0.16
  -2   1   0    3.65    0.16
   1  -1   0    7.39    0.17
   1  -1   0    7.37    0.13
  -1   1   0    7.16    0.18
  -1   1   0    7.37    0.18
   0  -1   0   14.95    0.23
   0   1   0   14.73    0.25
  -1  -1   0   15.30    0.29
   1   1   0   15.09    0.27
  -2  -1   0   41.83    0.75
  -2  -1   0   42.38    0.71
  -2  -1   0   42.64    0.65
   2   1   0   42.66    0.70
  -3  -1   0    0.66    0.08
  -3  -1   0    0.28    0.07
   3   1   0    0.51    0.07
  -4  -1   0   -0.06    0.04
   4   1   0    0.03    0.06
   4   1   0    0.02    0.04
  -5  -1   0    0.43    0.13
   5   1   0    0.20    0.09
  -6  -1   0    0.59    0.16
   6   1   0    0.50    0.14
   5  -2   0    2.50    0.23
  -5   2   0    1.69    0.22
   4  -2   0   26.73    0.62
  -4   2   0   26.34    0.69
   3  -2   0   78.31    1.31
  -3   2   0   78.13    1.38
  -3   2   0   79.03    1.36
   2  -2   0    1.55    0.10
   2  -2   0    1.46    0.06
  -2   2   0    1.54    0.12
  -2   2   0    1.46    0.12
   1  -2   0   66.09    0.98
  -1   2   0   65.84    1.06
  -1   2   0   65.39    1.04
   0  -2   0   22.85    0.34
   0  -2   0   22.26    0.36
   0   2   0   22.31    0.35
   0   2   0   22.51    0.40
  -1  -2   0   50.01    0.76
  -1  -2   0   49.52    0.78
   1   2   0   50.29    0.78
  -2  -2   0   28.98    0.52
  -2  -2   0   27.82    0.55
   2   2   0   28.60    0.52
  -3  -2   0    1.78    0.12
  -3  -2   0    1.92    0.14
   3   2   0    1.58    0.11
  -4  -2   0    7.40    0.32
   4   2   0    7.97    0.27
  -5  -2   0   24.98    0.71
   5   2   0   24.60    0.67
  -6  -2   0    5.17    0.35
   6   2   0    4.83    0.31
   5  -3   0    0.53    0.11
  -5   3   0    0.70    0.15
   4  -3   0    0.08    0.06
  -4   3   0    0.12    0.08
   3  -3   0    0.01    0.04
  -3   3   0    0.07    0.06
  -3   3   0    0.00    0.05
   2  -3   0   15.23    0.33
   2  -3   0   14.72    0.24
  -2   3   0   14.50    0.41
  -2   3   0   14.31    0.39
   1  -3   0   32.16    0.51
  -1   3   0   30.72    0.61
  -1   3   0   31.34    0.46
  -1   3   0   31.42    0.59
   0  -3   0   40.84    0.60
   0  -3   0   39.20    0.63
   0   3   0   40.66    0.69
   0   3   0   39.86    0.61
  -1  -3   0    3.12    0.12
  -1  -3   0    3.24    0.10
   1   3   0    3.11    0.11
   1   3   0    3.20    0.10
  -2  -3   0   51.09    0.85
  -2  -3   0   52.43    0.90
   2   3   0   52.90    0.87
  -3  -3   0    0.40    0.07
  -3  -3   0    0.39    0.08
   3   3   0    0.28    0.06
  -4  -3   0    0.02    0.06
  -4  -3   0    0.03    0.05
   4   3   0   -0.04    0.03
  -5  -3   0   32.35    0.84
   5   3   0   34.23    0.82
   5   3   0   32.61    0.72
  -6  -3   0    2.42    0.27
   6   3   0    2.11    0.23
   5  -4   0    0.89    0.13
  -5   4   0    0.95    0.18
   4  -4   0    3.76    0.20
  -4   4   0    4.04    0.27
  -4   4   0    3.52    0.26
   3  -4   0    0.34    0.07
  -3   4   0    0.31    0.09
  -3   4   0    0.28    0.10
   2  -4   0   13.74    0.31
  -2   4   0   13.60    0.42
  -2   4   0   13.95    0.39
   1  -4   0  234.96    3.43
   1  -4   0  229.09    3.42
  -1   4   0  240.02    3.34
  -1   4   0  231.83    3.49
   0  -4   0   32.58    0.57
   0  -4   0   34.50    0.52
   0   4   0   33.57    0.54
   0   4   0   34.16    0.64
  -1  -4   0    4.59    0.15
  -1  -4   0    4.64    0.13
   1   4   0    4.39    0.15
   1   4   0    4.54    0.15
  -2  -4   0   70.71    1.11
  -2  -4   0   67.51    1.15
   2   4   0   70.93    1.03
   2   4   0   71.48    1.14
  -3  -4   0    0.22    0.06
  -3  -4   0    0.28    0.08
   3   4   0    0.30    0.06
  -4  -4   0    7.94    0.28
  -4  -4   0    7.36    0.32
   4   4   0    7.30    0.28
  -5  -4   0   25.73    0.73
   5   4   0   26.44    0.63
  -6  -4   0    1.42    0.22
   6   4   0    1.62    0.21
   5  -5   0    0.30    0.09
  -5   5   0    0.58    0.16
   4  -5   0   23.96    0.58
  -4   5   0   24.69    0.74
  -4   5   0   23.96    0.71
   3  -5   0    0.19    0.06
  -3   5   0    0.30    0.09
  -3   5   0    0.22    0.10
   2  -5   0    1.71    0.10
  -2   5   0    2.04    0.16
  -2   5   0    2.14    0.21
   1  -5   0   74.55    1.10
   1  -5   0   70.97    1.17
  -1   5   0   75.37    1.07
  -1   5   0   72.37    1.31
   0  -5   0   41.23    0.64
   0  -5   0   41.13    0.70
   0   5   0   41.77    0.79
   0   5   0   40.08    0.66
  -1  -5   0   46.32    0.78
  -1  -5   0   46.60    0.73
   1   5   0   45.24    0.77
   1   5   0   44.47    0.80
  -2  -5   0    0.09    0.04
  -2  -5   0    0.03    0.04
   2   5   0    0.13    0.04
   2   5   0    0.10    0.05
  -3  -5   0    0.95    0.10
  -3  -5   0    0.64    0.10
   3   5   0    0.85    0.11
  -4  -5   0    6.08    0.30
  -4  -5   0    6.17    0.25
   4   5   0    6.04    0.25
  -5  -5   0    7.49    0.32
  -5  -5   0    7.92    0.38
   5   5   0    7.44    0.31
  -6  -5   0    0.20    0.11
   6   5   0    0.27    0.12
   5  -6   0    7.23    0.32
  -5   6   0    6.86    0.41
   4  -6   0   39.72    0.82
  -4   6   0   41.38    1.06
  -4   6   0   40.58    1.00
   3  -6   0    1.70    0.12
  -3   6   0    1.72    0.20
  -3   6   0    1.83    0.23
   2  -6   0    0.48    0.06
  -2   6   0    0.77    0.15
   1  -6   0    4.33    0.18
   1  -6   0    4.56    0.14
  -1   6   0    4.42    0.12
  -1   6   0    4.81    0.25
   0  -6   0   42.02    0.74
   0  -6   0   41.89    0.67
   0   6   0   42.10    0.70
   0   6   0   41.68    0.85
  -1  -6   0    2.42    0.10
  -1  -6   0    2.54    0.13
   1   6   0    2.56    0.15
   1   6   0    2.71    0.13
  -2  -6   0    0.55    0.09
  -2  -6   0    0.47    0.06
   2   6   0    0.44    0.08
   2   6   0    0.53    0.07
  -3  -6   0    0.42    0.09
  -3  -6   0    0.54    0.08
   3   6   0    0.65    0.10
  -4  -6   0   15.75    0.44
  -4  -6   0   16.60    0.51
   4   6   0   15.96    0.46
  -5  -6   0    4.00    0.24
  -5  -6   0    3.97    0.28
   5   6   0    3.89    0.23
  -6  -6   0    0.26    0.14
   6   6   0    0.21    0.09
   5  -7   0    0.00    0.07
   4  -7   0    0.73    0.11
  -4   7   0    0.44    0.15
  -4   7   0    0.35    0.13
   3  -7   0    3.91    0.18
  -3   7   0    4.11    0.31
   2  -7   0    6.69    0.20
   2  -7   0    6.80    0.26
  -2   7   0    7.06    0.36
   1  -7   0   16.46    0.41
   1  -7   0   17.04    0.34
  -1   7   0   16.88    0.53
   0  -7   0    0.28    0.04
   0  -7   0    0.46    0.08
   0   7   0    0.32    0.05
   0   7   0    0.32    0.08
  -1  -7   0    2.75    0.11
  -1  -7   0    2.53    0.14
   1   7   0    2.62    0.14
   1   7   0    2.57    0.17
  -2  -7   0    0.20    0.07
  -2  -7   0    0.20    0.05
   2   7   0    0.22    0.06
  -3  -7   0   14.91    0.45
  -3  -7   0   15.21    0.39
   3   7   0   14.92    0.42
  -4  -7   0   19.90    0.58
  -4  -7   0   19.71    0.51
   4   7   0   19.16    0.53
  -5  -7   0   11.17    0.40
  -5  -7   0   11.06    0.47
   5   7   0   10.97    0.41
   4  -8   0    0.79    0.15
  -4   8   0    0.84    0.20
   3  -8   0    4.42    0.24
   3  -8   0    3.86    0.18
  -3   8   0    4.43    0.34
   2  -8   0    4.14    0.22
   2  -8   0    4.12    0.16
  -2   8   0    3.54    0.28
   1  -8   0   15.74    0.42
   1  -8   0   16.76    0.35
   0  -8   0    0.70    0.07
   0  -8   0    0.75    0.10
   0   8   0    0.62    0.07
   0   8   0    0.55    0.12
  -1  -8   0   79.51    1.23
  -1  -8   0   77.51    1.33
   1   8   0   80.40    1.30
   1   8   0   79.40    1.43
  -2  -8   0    0.34    0.09
  -2  -8   0    0.25    0.06
   2   8   0    0.27    0.07
  -3  -8   0    4.23    0.19
  -3  -8   0    4.36    0.24
   3   8   0    4.37    0.23
  -4  -8   0    0.59    0.14
  -4  -8   0    0.65    0.11
   4   8   0    0.67    0.12
  -5  -8   0    0.10    0.08
  -5  -8   0    0.23    0.11
   5   8   0    0.17    0.09
   4  -9   0    0.85    0.16
  -4   9   0    0.92    0.22
   3  -9   0    0.63    0.13
  -3   9   0    0.89    0.20
   2  -9   0    1.82    0.18
  -2   9   0    1.97    0.27
   1  -9   0    0.04    0.05
  -1   9   0    0.08    0.09
   0  -9   0    0.10    0.05
   0   9   0    0.19    0.09
  -1  -9   0   27.75    0.63
  -1  -9   0   27.30    0.53
   1   9   0   28.70    0.72
   1   9   0   28.97    0.60
  -2  -9   0    0.55    0.11
  -2  -9   0    0.55    0.08
   2   9   0    0.64    0.10
  -3  -9   0    3.63    0.19
  -3  -9   0    3.53    0.23
   3   9   0    3.79    0.22
  -4  -9   0    2.78    0.18
  -4  -9   0    2.68    0.22
   4   9   0    2.87    0.21
  -5  -9   0    4.15    0.30
  -5  -9   0    4.03    0.24
   5   9   0    4.37    0.27
   3 -10   0    1.48    0.19
  -3  10   0    1.94    0.30
   2 -10   0    0.58    0.13
  -2  10   0    0.62    0.17
   1 -10   0    1.39    0.15
  -1  10   0    1.58    0.24
   0 -10   0    0.57    0.11
   0  10   0    0.75    0.16
  -1 -10   0   32.79    0.72
   1  10   0   30.84    0.80
   1  10   0   30.13    0.65
  -2 -10   0    3.26    0.21
   2  10   0    3.22    0.19
  -3 -10   0    1.47    0.18
   3  10   0    1.29    0.16
  -4 -10   0   -0.04    0.08
   4  10   0   -0.05    0.06
   3 -11   0    0.13    0.11
   2 -11   0    2.21    0.22
  -2  11   0    2.43    0.33
   1 -11   0    0.19    0.09
  -1  11   0    0.14    0.12
   0 -11   0    1.59    0.17
   0  11   0    1.63    0.23
  -1 -11   0   -0.13    0.05
   1  11   0    0.02    0.08
  -2 -11   0    2.94    0.22
   2  11   0    3.09    0.20
  -3 -11   0    1.00    0.16
   3  11   0    0.98    0.14
  -4 -11   0    0.50    0.14
   4  11   0    0.47    0.11
   2 -12   0    4.69    0.30
  -2  12   0    5.22    0.43
   1 -12   0    0.24    0.10
  -1  12   0    0.30    0.15
   0 -12   0    3.81    0.25
   0  12   0    4.14    0.33
  -1 -12   0    1.73    0.20
  -2 -12   0    0.30    0.10
   2  12   0    0.45    0.10
  -3 -12   0   -0.06    0.08
   3  12   0   -0.03    0.06
   1 -13   0    1.13    0.18
  -1  13   0    1.32    0.26
   0 -13   0    0.56    0.14
   0  13   0    0.58    0.18
  -1 -13   0    0.52    0.13
  -2 -13   0   -0.01    0.08
   3  13   0    0.05    0.08
   0 -14   0    0.02    0.09
   0  14   0    0.13    0.14
  -1 -14   0    0.29    0.12
  -3 -13   1    6.42    0.38
  -2 -13   1    1.22    0.19
  -1 -13   1    0.00    0.07
   0  13  -1    8.55    0.50
   0 -13   1    8.27    0.39
   1 -13   1    0.53    0.15
  -4 -12   1    0.14    0.14
   3  12  -1    2.86    0.22
  -3 -12   1    2.25    0.25
   2  12  -1    2.00    0.20
  -2 -12   1    1.72    0.21
  -1 -12   1    0.25    0.11
   0  12  -1    0.17    0.13
   0 -12   1    0.14    0.11
  -1  12  -1    0.00    0.11
   1 -12   1    0.02    0.08
   2 -12   1    0.20    0.12
   4  11  -1    0.74    0.15
  -4 -11   1    0.68    0.15
   3  11  -1    1.87    0.20
  -3 -11   1    1.52    0.20
   2  11  -1    0.18    0.08
  -2 -11   1    0.29    0.11
   1  11  -1    0.53    0.14
  -1 -11   1    0.29    0.10
   0  11  -1    3.45    0.30
   0 -11   1    2.86    0.21
  -1  11  -1    1.09    0.23
   1 -11   1    1.04    0.15
  -2  11  -1    0.31    0.15
   2 -11   1    0.07    0.09
  -5 -10   1    0.13    0.18
   4  10  -1    5.11    0.28
  -4 -10   1    5.28    0.33
   3  10  -1    3.05    0.21
  -3 -10   1    3.43    0.25
   2  10  -1    0.17    0.07
  -2 -10   1    0.42    0.11
   1  10  -1   20.16    0.49
   1  10  -1   18.66    0.61
  -1 -10   1   19.10    0.53
   0  10  -1   22.33    0.71
   0 -10   1   22.39    0.58
  -1  10  -1    7.74    0.44
   1 -10   1    8.59    0.34
  -2  10  -1    7.55    0.46
   2 -10   1    7.10    0.33
  -3  10  -1    9.09    0.54
   3 -10   1    9.07    0.39
   5   9  -1    0.06    0.08
  -5  -9   1    0.02    0.10
   4   9  -1    0.16    0.08
  -4  -9   1    0.09    0.10
   3   9  -1    0.09    0.06
  -3  -9   1    0.11    0.08
   2   9  -1   31.16    0.68
  -2  -9   1   30.76    0.72
   1   9  -1   51.02    1.08
   1   9  -1   51.23    0.93
  -1  -9   1   50.82    0.99
   0   9  -1   11.71    0.47
   0  -9   1   11.31    0.37
  -1   9  -1    0.06    0.09
   1  -9   1    0.06    0.06
  -2   9  -1    0.86    0.19
   2  -9   1    1.14    0.15
  -3   9  -1   -0.10    0.09
   3  -9   1    0.08    0.09
  -4   9  -1    0.18    0.14
   5   8  -1   -0.03    0.06
  -5  -8   1    0.18    0.11
  -5  -8   1   -0.02    0.07
   4   8  -1   15.09    0.48
  -4  -8   1   15.35    0.53
  -4  -8   1   15.17    0.43
   3   8  -1    0.18    0.07
  -3  -8   1    0.06    0.05
  -3  -8   1    0.21    0.09
   2   8  -1    2.49    0.16
  -2  -8   1    2.94    0.18
  -2  -8   1    2.67    0.13
   1   8  -1   15.71    0.40
   1   8  -1   15.51    0.48
  -1  -8   1   16.86    0.44
   0   8  -1    0.04    0.07
   0   8  -1    0.01    0.03
   0  -8   1    0.01    0.05
  -1   8  -1    2.97    0.25
   1  -8   1    3.25    0.19
  -2   8  -1    0.22    0.12
   2  -8   1    0.40    0.10
  -3   8  -1    0.19    0.12
   3  -8   1    0.16    0.08
  -4   8  -1    0.10    0.13
   4  -8   1    0.11    0.09
   5   7  -1    4.91    0.27
  -5  -7   1    5.49    0.27
  -5  -7   1    5.25    0.33
   4   7  -1    3.51    0.22
  -4  -7   1    3.28    0.19
  -4  -7   1    3.31    0.24
   3   7  -1    2.94    0.18
  -3  -7   1    2.75    0.15
  -3  -7   1    2.79    0.20
   2   7  -1   10.67    0.33
  -2  -7   1   10.96    0.35
  -2  -7   1   10.28    0.27
   1   7  -1    6.76    0.28
   1   7  -1    6.60    0.23
  -1  -7   1    6.84    0.18
  -1  -7   1    6.53    0.25
   0   7  -1    1.38    0.16
   0   7  -1    1.62    0.10
   0  -7   1    1.41    0.11
   0  -7   1    1.46    0.07
  -1   7  -1    1.06    0.15
   1  -7   1    1.16    0.07
   1  -7   1    0.83    0.10
   2  -7   1    2.57    0.17
   2  -7   1    2.53    0.12
  -3   7  -1    1.16    0.20
   3  -7   1    1.36    0.12
   3  -7   1    1.27    0.15
  -4   7  -1    3.04    0.34
   6   6  -1    1.44    0.18
   5   6  -1    0.08    0.07
  -5  -6   1    0.20    0.11
  -5  -6   1    0.19    0.09
   4   6  -1    6.45    0.28
  -4  -6   1    6.21    0.26
  -4  -6   1    6.47    0.32
   3   6  -1   -0.02    0.04
  -3  -6   1    0.00    0.06
  -3  -6   1    0.00    0.04
   2   6  -1    1.38    0.11
  -2  -6   1    1.36    0.09
  -2  -6   1    1.48    0.14
   1   6  -1   11.71    0.30
   1   6  -1   11.74    0.35
  -1  -6   1   12.03    0.25
  -1  -6   1   11.63    0.32
   0   6  -1    0.33    0.05
   0   6  -1    0.48    0.10
   0  -6   1    0.31    0.04
   0  -6   1    0.32    0.07
  -1   6  -1    2.18    0.18
  -1   6  -1    1.95    0.09
   1  -6   1    2.16    0.09
   1  -6   1    1.88    0.13
  -2   6  -1    2.32    0.25
   2  -6   1    2.08    0.11
   2  -6   1    1.77    0.13
  -3   6  -1    3.43    0.27
  -3   6  -1    3.25    0.24
   3  -6   1    3.66    0.17
  -4   6  -1    5.13    0.36
  -4   6  -1    5.71    0.35
   4  -6   1    5.58    0.24
  -5   6  -1    3.92    0.55
   5  -6   1    4.00    0.24
   6   5  -1   -0.08    0.08
  -6  -5   1   -0.16    0.08
   5   5  -1    2.04    0.19
  -5  -5   1    2.70    0.27
   4   5  -1   -0.05    0.04
  -4  -5   1    0.04    0.06
  -4  -5   1    0.00    0.06
   3   5  -1    0.18    0.06
  -3  -5   1    0.21    0.06
  -3  -5   1    0.11    0.07
   2   5  -1   63.65    1.03
   2   5  -1   64.55    1.09
  -2  -5   1   65.65    1.03
  -2  -5   1   63.61    1.12
   1   5  -1   92.31    1.45
   1   5  -1   92.94    1.50
  -1  -5   1   95.06    1.38
  -1  -5   1   94.66    1.48
   0   5  -1    5.12    0.23
   0   5  -1    5.05    0.15
   0  -5   1    5.35    0.13
   0  -5   1    5.57    0.18
  -1   5  -1    0.13    0.06
  -1   5  -1    0.17    0.03
   1  -5   1    0.06    0.04
   1  -5   1    0.13    0.03
  -2   5  -1    6.76    0.32
   2  -5   1    7.02    0.20
  -3   5  -1   -0.02    0.07
  -3   5  -1    0.05    0.06
   3  -5   1    0.02    0.04
  -4   5  -1    0.41    0.14
  -4   5  -1    0.31    0.12
   4  -5   1    0.45    0.09
  -5   5  -1    0.24    0.12
   5  -5   1    0.20    0.09
   6   4  -1    2.93    0.28
  -6  -4   1    3.50    0.33
   5   4  -1    9.22    0.39
   5   4  -1    8.57    0.33
  -5  -4   1    8.60    0.40
   4   4  -1   11.57    0.36
  -4  -4   1   12.02    0.43
  -4  -4   1   11.81    0.36
   3   4  -1   20.42    0.47
  -3  -4   1   19.37    0.51
  -3  -4   1   20.45    0.45
   2   4  -1   31.35    0.52
   2   4  -1   31.18    0.59
  -2  -4   1   30.48    0.55
  -2  -4   1   30.81    0.62
   1   4  -1    8.86    0.23
   1   4  -1    9.44    0.25
  -1  -4   1    9.05    0.25
  -1  -4   1    9.24    0.20
   0   4  -1    0.61    0.05
   0   4  -1    0.63    0.10
   0  -4   1    0.62    0.07
   0  -4   1    0.66    0.04
  -1   4  -1   13.54    0.25
   1  -4   1   12.84    0.31
   1  -4   1   13.28    0.25
  -2   4  -1    2.76    0.19
  -2   4  -1    2.85    0.18
   2  -4   1    2.90    0.12
  -3   4  -1    1.32    0.17
  -3   4  -1    0.83    0.14
   3  -4   1    1.41    0.13
  -4   4  -1    1.96    0.22
  -4   4  -1    2.00    0.24
   4  -4   1    2.19    0.16
  -5   4  -1    6.90    0.40
   5  -4   1    6.62    0.30
   6   3  -1    0.61    0.14
  -6  -3   1    0.48    0.16
   5   3  -1   15.11    0.51
   5   3  -1   15.94    0.44
  -5  -3   1   15.77    0.55
   4   3  -1    3.13    0.17
  -4  -3   1    2.84    0.21
   3   3  -1    0.36    0.07
  -3  -3   1    0.32    0.08
  -3  -3   1    0.40    0.07
   2   3  -1    2.85    0.13
  -2  -3   1    2.94    0.15
  -2  -3   1    3.00    0.12
   1   3  -1    1.35    0.08
   1   3  -1    1.28    0.08
  -1  -3   1    1.26    0.08
  -1  -3   1    1.39    0.06
   0   3  -1    0.19    0.03
   0   3  -1    0.28    0.06
   0  -3   1    0.23    0.04
   0  -3   1    0.24    0.02
  -1   3  -1   20.21    0.34
   1  -3   1   20.04    0.39
   1  -3   1   20.26    0.35
  -2   3  -1    2.45    0.15
  -2   3  -1    2.83    0.18
  -2   3  -1    2.80    0.10
   2  -3   1    2.91    0.12
  -3   3  -1    0.44    0.10
  -3   3  -1    0.64    0.12
   3  -3   1    0.46    0.08
  -4   3  -1    1.06    0.17
   4  -3   1    1.06    0.13
  -5   3  -1    0.40    0.13
   5  -3   1    0.54    0.12
   6   2  -1    1.12    0.17
  -6  -2   1    1.28    0.22
   5   2  -1    6.92    0.33
  -5  -2   1    6.26    0.34
   4   2  -1    1.00    0.14
   4   2  -1    0.64    0.09
  -4  -2   1    0.66    0.12
   3   2  -1   19.08    0.42
  -3  -2   1   18.74    0.48
  -3  -2   1   18.83    0.42
   2   2  -1    0.72    0.07
  -2  -2   1    0.72    0.09
  -2  -2   1    0.67    0.07
   1   2  -1    5.41    0.13
   1   2  -1    5.36    0.15
  -1  -2   1    4.94    0.16
  -1  -2   1    5.36    0.13
   0   2  -1   28.78    0.51
   0   2  -1   28.29    0.45
   0  -2   1   27.35    0.46
   0  -2   1   28.94    0.41
  -1   2  -1    6.71    0.20
  -1   2  -1    7.07    0.15
   1  -2   1    7.13    0.16
  -2   2  -1    2.97    0.16
  -2   2  -1    3.04    0.17
  -2   2  -1    2.74    0.11
   2  -2   1    3.06    0.13
  -3   2  -1    0.80    0.12
  -3   2  -1    0.66    0.11
   3  -2   1    1.01    0.12
  -4   2  -1    9.66    0.38
   4  -2   1    8.96    0.33
  -5   2  -1    1.36    0.19
   5  -2   1    1.38    0.17
   6   1  -1   -0.02    0.07
  -6  -1   1    0.03    0.11
   5   1  -1   23.97    0.66
  -5  -1   1   25.24    0.73
   4   1  -1    0.24    0.08
   4   1  -1    0.21    0.06
  -4  -1   1    0.30    0.10
   3   1  -1    3.92    0.19
   3   1  -1    4.13    0.16
  -3  -1   1    3.86    0.20
   2   1  -1   22.95    0.43
  -2  -1   1   23.37    0.49
  -2  -1   1   23.81    0.44
  -2  -1   1   23.63    0.38
   1   1  -1   63.42    0.95
  -1  -1   1   64.48    0.94
  -1  -1   1   62.54    0.97
   0   1  -1   78.13    1.16
   0   1  -1   76.00    1.18
   0  -1   1   81.11    1.21
  -1   1  -1    4.83    0.15
  -1   1  -1    5.83    0.13
  -1   1  -1    4.40    0.16
   1  -1   1    4.48    0.13
  -2   1  -1    4.67    0.18
  -2   1  -1    4.77    0.19
   2  -1   1    4.66    0.17
   2  -1   1    4.46    0.13
  -3   1  -1   19.24    0.49
  -3   1  -1   19.97    0.48
   3  -1   1   18.85    0.46
   3  -1   1   19.44    0.38
  -4   1  -1    2.46    0.20
   4  -1   1    2.42    0.17
  -5   1  -1    0.28    0.12
   5  -1   1    0.00    0.06
  -6   1  -1    4.34    0.33
   6  -1   1    4.02    0.28
   6   0  -1    2.49    0.25
  -6   0   1    3.35    0.34
   5   0  -1   -0.03    0.06
  -5   0   1    0.02    0.08
   4   0  -1    0.94    0.13
  -4   0   1    0.76    0.13
   3   0  -1   29.56    0.62
   3   0  -1   30.42    0.54
  -3   0   1   29.21    0.65
  -3   0   1   29.64    0.56
   2   0  -1    0.02    0.02
   2   0  -1    0.01    0.03
  -2   0   1   -0.02    0.02
  -2   0   1   -0.05    0.03
   1   0  -1  254.23    3.67
   1   0  -1  245.50    3.68
  -1   0   1  256.29    3.70
  -1   0   1  256.59    3.74
   0   0  -1   58.44    0.88
  -1   0  -1   12.69    0.25
  -1   0  -1   12.50    0.23
  -1   0  -1   12.66    0.26
  -1   0  -1   13.04    0.24
  -2   0  -1   67.75    1.09
  -2   0  -1   68.49    1.06
  -2   0  -1   67.26    1.10
   2   0   1   67.91    1.03
  -3   0  -1   23.70    0.51
  -3   0  -1   23.51    0.54
   3   0   1   23.72    0.46
  -4   0  -1   29.63    0.71
   4   0   1   30.18    0.69
  -5   0  -1    0.03    0.08
   5   0   1    0.07    0.07
  -6   0  -1    0.16    0.12
   6   0   1    0.21    0.11
  -6   1   1    3.67    0.52
   5  -1  -1    9.43    0.37
  -5   1   1    8.69    0.41
   4  -1  -1    4.73    0.23
  -4   1   1    4.11    0.25
   3  -1  -1   52.18    0.93
   3  -1  -1   52.20    0.83
  -3   1   1   52.03    0.92
  -3   1   1   49.21    0.97
   2  -1  -1   85.36    1.24
   2  -1  -1   85.05    1.32
  -2   1   1   82.69    1.31
  -2   1   1   84.19    1.35
   1  -1  -1  112.96    1.66
   1  -1  -1  117.20    1.65
  -1   1   1  114.69    1.68
  -1   1   1  115.54    1.69
   0  -1  -1  133.92    1.93
   0  -1  -1  132.23    1.94
   0   1   1  131.25    1.96
  -1  -1  -1  101.88    1.53
  -1  -1  -1  101.38    1.48
   1   1   1  101.64    1.46
   1   1   1  102.67    1.47
  -2  -1  -1    6.80    0.18
  -2  -1  -1    7.18    0.22
   2   1   1    7.32    0.19
  -3  -1  -1    9.14    0.30
  -3  -1  -1    9.48    0.25
  -3  -1  -1    9.15    0.27
   3   1   1    9.69    0.26
  -4  -1  -1    5.29    0.27
   4   1   1    5.24    0.21
  -5  -1  -1    1.49    0.20
   5   1   1    1.55    0.19
  -6  -1  -1    0.98    0.19
   6   1   1    0.98    0.17
   5  -2  -1    8.60    0.35
  -5   2   1    8.68    0.42
   4  -2  -1    9.00    0.32
  -4   2   1    8.79    0.36
   3  -2  -1   69.10    1.16
  -3   2   1   66.98    1.22
  -3   2   1   67.33    1.19
   2  -2  -1    1.11    0.10
   2  -2  -1    0.90    0.04
  -2   2   1    0.99    0.10
  -2   2   1    0.95    0.10
   1  -2  -1   35.18    0.56
  -1   2   1   35.01    0.60
  -1   2   1   34.80    0.62
   0  -2  -1  275.80    3.98
   0  -2  -1  271.88    3.96
   0   2   1  274.52    3.95
   0   2   1  278.79    4.09
  -1  -2  -1   10.41    0.21
  -1  -2  -1   10.03    0.21
   1   2   1   10.54    0.22
   1   2   1   10.61    0.19
  -2  -2  -1    0.51    0.06
  -2  -2  -1    0.51    0.07
   2   2   1    0.57    0.04
   2   2   1    0.53    0.06
  -3  -2  -1    2.25    0.13
  -3  -2  -1    2.14    0.15
   3   2   1    2.56    0.13
  -4  -2  -1    1.67    0.16
  -4  -2  -1    1.10    0.15
   4   2   1    1.39    0.11
  -5  -2  -1    0.83    0.15
   5   2   1    0.91    0.15
  -6  -2  -1    1.77    0.24
   6   2   1    1.22    0.19
   5  -3  -1    0.07    0.07
  -5   3   1    0.06    0.09
   4  -3  -1    1.26    0.14
  -4   3   1    1.64    0.20
   3  -3  -1   22.71    0.51
  -3   3   1   23.90    0.59
   2  -3  -1    0.41    0.06
  -2   3   1    0.41    0.08
  -2   3   1    0.33    0.07
   1  -3  -1   12.08    0.24
  -1   3   1   11.94    0.32
  -1   3   1   12.11    0.29
   0  -3  -1    1.68    0.07
   0  -3  -1    1.96    0.06
   0   3   1    1.53    0.10
   0   3   1    1.61    0.06
  -1  -3  -1   -0.01    0.02
  -1  -3  -1    0.03    0.03
   1   3   1   -0.04    0.02
   1   3   1    0.01    0.03
  -2  -3  -1    0.19    0.05
  -2  -3  -1    0.16    0.05
   2   3   1    0.19    0.02
   2   3   1    0.19    0.05
  -3  -3  -1    7.08    0.26
  -3  -3  -1    7.07    0.23
   3   3   1    6.70    0.23
  -4  -3  -1    0.71    0.11
  -4  -3  -1    0.51    0.10
   4   3   1    0.43    0.08
  -5  -3  -1    2.89    0.24
   5   3   1    2.65    0.18
  -6  -3  -1   19.49    0.67
   6   3   1   20.16    0.65
   5  -4  -1    0.40    0.10
  -5   4   1    0.57    0.15
   4  -4  -1    0.12    0.06
  -4   4   1    0.12    0.09
   3  -4  -1    0.26    0.06
  -3   4   1    0.30    0.09
  -3   4   1    0.15    0.08
   2  -4  -1    9.20    0.25
  -2   4   1    9.63    0.34
  -2   4   1    9.81    0.31
   1  -4  -1    0.68    0.06
  -1   4   1    0.48    0.08
  -1   4   1    0.63    0.08
   0  -4  -1    6.74    0.17
   0  -4  -1    6.69    0.15
   0   4   1    6.77    0.22
   0   4   1    6.84    0.16
  -1  -4  -1    5.29    0.14
  -1  -4  -1    5.59    0.16
   1   4   1    5.53    0.17
   1   4   1    5.22    0.16
  -2  -4  -1    2.84    0.12
  -2  -4  -1    2.79    0.14
   2   4   1    2.82    0.14
   2   4   1    2.70    0.09
  -3  -4  -1   19.04    0.43
  -3  -4  -1   19.10    0.47
   3   4   1   18.81    0.45
  -4  -4  -1   10.70    0.34
  -4  -4  -1   10.91    0.39
   4   4   1   10.88    0.34
  -5  -4  -1   25.46    0.72
  -5  -4  -1   26.31    0.65
   5   4   1   26.44    0.63
  -6  -4  -1    7.27    0.41
   6   4   1    6.87    0.38
   5  -5  -1    1.26    0.16
  -5   5   1    1.68    0.25
   4  -5  -1    4.19    0.21
  -4   5   1    4.29    0.30
  -4   5   1    4.40    0.29
   3  -5  -1   16.18    0.40
  -3   5   1   15.88    0.49
  -3   5   1   15.54    0.52
   2  -5  -1    0.03    0.03
  -2   5   1    0.03    0.05
  -2   5   1    0.05    0.06
   1  -5  -1    4.06    0.15
   1  -5  -1    3.88    0.12
  -1   5   1    3.90    0.09
  -1   5   1    3.91    0.21
   0  -5  -1    0.57    0.06
   0  -5  -1    0.64    0.05
   0   5   1    0.58    0.05
   0   5   1    0.60    0.09
  -1  -5  -1    0.71    0.08
  -1  -5  -1    0.68    0.07
   1   5   1    0.62    0.08
   1   5   1    0.57    0.08
  -2  -5  -1  122.77    1.87
  -2  -5  -1  123.34    1.91
   2   5   1  124.66    1.91
   2   5   1  127.43    1.83
  -3  -5  -1   24.49    0.57
  -3  -5  -1   25.41    0.53
   3   5   1   24.49    0.55
  -4  -5  -1    3.25    0.22
  -4  -5  -1    3.36    0.19
   4   5   1    2.87    0.18
  -5  -5  -1    1.51    0.17
  -5  -5  -1    1.30    0.19
   5   5   1    1.43    0.16
  -6  -5  -1    3.22    0.31
   6   5   1    3.19    0.31
   5  -6  -1    5.70    0.28
  -5   6   1    4.70    0.35
   4  -6  -1   28.37    0.65
  -4   6   1   30.07    0.82
  -4   6   1   29.61    0.85
   3  -6  -1    5.66    0.22
  -3   6   1    5.66    0.30
  -3   6   1    5.17    0.32
   2  -6  -1    9.59    0.26
  -2   6   1   10.71    0.41
  -2   6   1   10.76    0.37
   1  -6  -1   47.61    0.84
   1  -6  -1   48.55    0.78
  -1   6   1   49.13    0.99
   0  -6  -1   14.26    0.29
   0  -6  -1   14.88    0.33
   0   6   1   14.13    0.30
   0   6   1   14.24    0.41
  -1  -6  -1    0.32    0.05
  -1  -6  -1    0.35    0.06
   1   6   1    0.26    0.05
   1   6   1    0.33    0.07
  -2  -6  -1    7.86    0.23
  -2  -6  -1    7.57    0.25
   2   6   1    7.82    0.22
   2   6   1    7.86    0.26
  -3  -6  -1    0.25    0.06
  -3  -6  -1    0.55    0.10
   3   6   1    0.20    0.06
  -4  -6  -1    1.94    0.15
  -4  -6  -1    1.96    0.20
   4   6   1    1.59    0.16
  -5  -6  -1    0.67    0.14
  -5  -6  -1    0.47    0.11
   5   6   1    0.49    0.11
  -6  -6  -1    1.16    0.21
   6   6   1    1.52    0.19
   5  -7  -1    0.22    0.09
   4  -7  -1   16.59    0.46
  -4   7   1   18.29    0.63
  -4   7   1   18.10    0.67
   3  -7  -1   -0.02    0.04
  -3   7   1    0.11    0.09
  -3   7   1    0.11    0.10
   2  -7  -1    0.38    0.08
   2  -7  -1    0.36    0.06
  -2   7   1    0.61    0.14
   1  -7  -1    3.30    0.16
   1  -7  -1    3.43    0.13
  -1   7   1    3.65    0.23
   0  -7  -1    1.95    0.12
   0  -7  -1    2.08    0.09
   0   7   1    2.09    0.10
   0   7   1    1.82    0.16
  -1  -7  -1    1.20    0.10
  -1  -7  -1    1.08    0.08
   1   7   1    1.13    0.09
   1   7   1    0.92    0.11
  -2  -7  -1    6.64    0.21
  -2  -7  -1    6.42    0.24
   2   7   1    5.94    0.23
   2   7   1    6.21    0.22
  -3  -7  -1    6.40    0.27
  -3  -7  -1    6.27    0.23
   3   7   1    6.26    0.26
  -4  -7  -1    3.09    0.19
  -4  -7  -1    3.36    0.23
   4   7   1    3.58    0.21
  -5  -7  -1    7.84    0.38
  -5  -7  -1    7.96    0.33
   5   7   1    7.64    0.33
   4  -8  -1    5.98    0.26
  -4   8   1    5.56    0.37
  -4   8   1    5.55    0.39
   3  -8  -1    0.04    0.04
   3  -8  -1    0.04    0.07
  -3   8   1    0.01    0.10
   2  -8  -1    4.81    0.23
   2  -8  -1    4.46    0.18
  -2   8   1    4.56    0.31
   1  -8  -1    0.04    0.03
   1  -8  -1    0.01    0.05
  -1   8   1   -0.08    0.05
   0  -8  -1    0.05    0.03
   0  -8  -1    0.05    0.04
   0   8   1    0.08    0.04
   0   8   1   -0.02    0.05
  -1  -8  -1   19.34    0.40
  -1  -8  -1   18.79    0.45
   1   8   1   20.21    0.53
   1   8   1   19.81    0.45
  -2  -8  -1   26.98    0.60
  -2  -8  -1   27.72    0.55
   2   8   1   26.92    0.59
  -3  -8  -1   11.70    0.35
  -3  -8  -1   13.02    0.41
   3   8   1   12.41    0.39
  -4  -8  -1    1.41    0.15
  -4  -8  -1    1.26    0.17
   4   8   1    1.79    0.19
  -5  -8  -1   16.26    0.57
  -5  -8  -1   17.09    0.51
   5   8   1   16.62    0.53
   4  -9  -1    0.06    0.10
  -4   9   1    0.13    0.13
   3  -9  -1    0.41    0.08
   3  -9  -1    0.53    0.12
  -3   9   1    0.73    0.18
   2  -9  -1    2.24    0.17
   2  -9  -1    2.08    0.13
  -2   9   1    2.30    0.28
   1  -9  -1    4.11    0.21
   1  -9  -1    3.79    0.16
  -1   9   1    3.28    0.26
   0  -9  -1    0.49    0.09
   0  -9  -1    0.36    0.06
   0   9   1    0.24    0.09
  -1  -9  -1   42.07    0.82
  -1  -9  -1   41.43    0.74
   1   9   1   43.14    0.79
   1   9   1   42.50    0.92
  -2  -9  -1   31.62    0.62
  -2  -9  -1   32.44    0.69
   2   9   1   31.47    0.68
  -3  -9  -1   10.03    0.32
  -3  -9  -1    9.92    0.37
   3   9   1    9.99    0.36
  -4  -9  -1    4.23    0.22
  -4  -9  -1    4.31    0.27
   4   9   1    4.03    0.24
  -5  -9  -1    0.03    0.07
   5   9   1    0.00    0.07
   3 -10  -1    1.11    0.17
  -3  10   1    1.06    0.23
   2 -10  -1   15.78    0.48
  -2  10   1   15.72    0.64
   1 -10  -1    0.03    0.06
  -1  10   1    0.11    0.09
   0 -10  -1    2.75    0.18
   0 -10  -1    2.85    0.14
   0  10   1    2.92    0.25
  -1 -10  -1   42.91    0.77
  -1 -10  -1   41.83    0.86
   1  10   1   43.95    0.98
   1  10   1   43.02    0.82
  -2 -10  -1    5.26    0.21
  -2 -10  -1    5.35    0.25
   2  10   1    5.30    0.24
  -3 -10  -1    2.58    0.16
  -3 -10  -1    2.85    0.21
   3  10   1    2.62    0.19
  -4 -10  -1    3.14    0.21
   4  10   1    3.15    0.22
  -5 -10  -1    1.78    0.20
   3 -11  -1    0.84    0.14
  -3  11   1    0.60    0.20
   2 -11  -1    0.45    0.12
  -2  11   1    0.48    0.16
   1 -11  -1    0.00    0.06
  -1  11   1   -0.05    0.09
   0 -11  -1    0.91    0.13
   0  11   1    0.75    0.16
  -1 -11  -1    4.13    0.23
   1  11   1    3.86    0.28
  -2 -11  -1    2.13    0.18
   2  11   1    2.26    0.17
  -3 -11  -1    0.01    0.07
   3  11   1    0.09    0.07
   4  11   1    2.36    0.23
   2 -12  -1    1.19    0.17
  -2  12   1    1.11    0.24
   1 -12  -1    0.05    0.07
  -1  12   1   -0.05    0.10
   0 -12  -1    0.00    0.06
   0  12   1   -0.01    0.09
  -1 -12  -1    1.36    0.17
   1  12   1    1.00    0.18
  -2 -12  -1    0.16    0.09
   2  12   1    0.05    0.06
   3  12   1    1.50    0.18
   4  12   1    1.73    0.31
   1 -13  -1    0.07    0.08
  -1  13   1    0.11    0.13
   0 -13  -1    3.81    0.25
   0  13   1    3.97    0.39
  -1 -13  -1    9.20    0.39
   3  13   1    7.25    0.34
   1 -14  -1    2.76    0.29
   0  14   1   11.26    0.58
  -2 -13   2    2.73    0.27
  -1 -13   2    0.19    0.11
   0  13  -2    0.14    0.13
   0 -13   2    0.06    0.09
   3  12  -2    3.83    0.26
  -3 -12   2    4.17    0.31
   2  12  -2    0.04    0.07
  -2 -12   2   -0.02    0.08
  -1 -12   2    0.22    0.11
   0  12  -2    3.70    0.38
   0 -12   2    3.48    0.25
  -1  12  -2    4.69    0.39
   1 -12   2    4.93    0.30
  -4 -11   2    0.24    0.13
   3  11  -2    0.35    0.10
  -3 -11   2    0.52    0.14
   2  11  -2    0.54    0.11
  -2 -11   2    0.63    0.14
  -1 -11   2    2.36    0.23
   0  11  -2    1.30    0.23
   0 -11   2    1.05    0.16
  -1  11  -2    0.96    0.21
   1 -11   2    0.86    0.15
  -2  11  -2    0.04    0.12
   2 -11   2    0.01    0.08
   4  10  -2    0.03    0.07
  -4 -10   2    0.00    0.09
   3  10  -2    0.88    0.14
  -3 -10   2    0.74    0.14
   2  10  -2    0.04    0.06
  -2 -10   2    0.11    0.09
   1  10  -2    0.07    0.05
   1  10  -2    0.12    0.09
  -1 -10   2    0.17    0.09
   0  10  -2    1.24    0.21
   0 -10   2    1.53    0.18
  -1  10  -2    0.34    0.14
   1 -10   2    0.42    0.11
  -2  10  -2    0.25    0.14
   2 -10   2    0.18    0.10
  -3  10  -2    0.91    0.22
   3 -10   2    1.10    0.18
  -5  -9   2    0.64    0.19
   4   9  -2    0.05    0.06
  -4  -9   2    0.01    0.08
   3   9  -2    4.89    0.25
  -3  -9   2    4.72    0.29
   2   9  -2    1.59    0.16
  -2  -9   2    2.02    0.20
   1   9  -2    4.89    0.29
   1   9  -2    5.22    0.22
  -1  -9   2    5.02    0.26
   0   9  -2   54.54    1.21
   0  -9   2   52.34    1.03
  -1   9  -2    2.18    0.26
   1  -9   2    2.81    0.19
  -2   9  -2    0.81    0.19
   2  -9   2    1.16    0.16
  -3   9  -2    6.66    0.45
   3  -9   2    7.83    0.36
   5   8  -2    0.63    0.13
  -5  -8   2    0.38    0.13
   4   8  -2    3.01    0.21
  -4  -8   2    2.93    0.28
   3   8  -2   19.25    0.52
  -3  -8   2   19.86    0.58
   2   8  -2   10.53    0.34
  -2  -8   2   10.79    0.38
   1   8  -2    4.02    0.19
   1   8  -2    3.85    0.24
  -1  -8   2    3.91    0.21
   0   8  -2   61.88    1.05
   0   8  -2   62.30    1.29
   0  -8   2   63.05    1.13
  -1   8  -2    9.10    0.43
   1  -8   2    9.04    0.32
  -2   8  -2    5.29    0.36
   2  -8   2    4.78    0.25
  -3   8  -2    1.29    0.24
   3  -8   2    1.02    0.15
  -4   8  -2    2.09    0.31
   4  -8   2    1.73    0.21
   5   7  -2    0.17    0.09
  -5  -7   2    0.17    0.10
   4   7  -2   22.00    0.58
  -4  -7   2   22.73    0.66
  -4  -7   2   21.21    0.53
   3   7  -2    1.53    0.16
  -3  -7   2    1.41    0.17
  -3  -7   2    1.37    0.12
   2   7  -2   12.60    0.36
  -2  -7   2   11.84    0.38
   1   7  -2   18.45    0.44
   1   7  -2   18.93    0.52
  -1  -7   2   19.25    0.48
   0   7  -2    7.68    0.23
   0   7  -2    7.25    0.34
   0  -7   2    7.77    0.27
  -1   7  -2   -0.07    0.06
   1  -7   2   -0.01    0.05
  -2   7  -2    7.53    0.40
   2  -7   2    7.15    0.28
  -3   7  -2    0.51    0.15
   3  -7   2    0.63    0.12
  -4   7  -2    0.06    0.11
   4  -7   2    0.00    0.07
   5   6  -2    1.20    0.16
   5   6  -2    1.04    0.16
  -5  -6   2    1.06    0.18
   4   6  -2    4.28    0.23
  -4  -6   2    4.04    0.27
  -4  -6   2    4.42    0.21
   3   6  -2   21.01    0.52
  -3  -6   2   21.33    0.57
  -3  -6   2   21.26    0.47
   2   6  -2    1.84    0.13
  -2  -6   2    2.20    0.15
  -2  -6   2    1.62    0.10
   1   6  -2   12.54    0.32
   1   6  -2   12.34    0.38
  -1  -6   2   12.28    0.35
  -1  -6   2   12.09    0.25
   0   6  -2    1.68    0.10
   0   6  -2    1.93    0.19
   0  -6   2    1.49    0.06
   0  -6   2    1.45    0.11
  -1   6  -2    0.73    0.07
  -1   6  -2    0.70    0.14
   1  -6   2    0.55    0.08
   1  -6   2    0.64    0.05
  -2   6  -2    4.09    0.28
   2  -6   2    3.61    0.19
   2  -6   2    3.39    0.14
  -3   6  -2    0.07    0.09
   3  -6   2    0.02    0.07
  -4   6  -2    1.32    0.22
   5   5  -2    0.31    0.09
   5   5  -2    0.32    0.10
  -5  -5   2    0.30    0.12
   4   5  -2    0.03    0.05
  -4  -5   2    0.04    0.08
  -4  -5   2    0.00    0.05
   3   5  -2    2.32    0.15
  -3  -5   2    2.30    0.13
  -3  -5   2    2.24    0.18
   2   5  -2    0.64    0.08
   2   5  -2    0.89    0.10
  -2  -5   2    0.98    0.09
  -2  -5   2    0.73    0.11
   1   5  -2   23.38    0.53
   1   5  -2   23.05    0.47
  -1  -5   2   22.53    0.49
  -1  -5   2   22.84    0.40
   0   5  -2    8.66    0.22
   0   5  -2    8.20    0.31
   0  -5   2    8.20    0.25
   0  -5   2    8.32    0.16
  -1   5  -2    0.55    0.06
  -1   5  -2    0.47    0.10
   1  -5   2    0.40    0.07
   1  -5   2    0.55    0.05
  -2   5  -2   42.79    0.98
   2  -5   2   43.32    0.72
  -3   5  -2    2.65    0.22
  -3   5  -2    3.22    0.26
   3  -5   2    3.05    0.15
  -4   5  -2    1.01    0.17
  -4   5  -2    0.86    0.18
   4  -5   2    0.95    0.12
  -5   5  -2   10.41    0.50
   5  -5   2   10.32    0.38
   6   4  -2    0.22    0.11
   5   4  -2    9.05    0.38
   5   4  -2    8.61    0.33
  -5  -4   2    8.76    0.42
   4   4  -2   67.00    1.20
  -4  -4   2   66.80    1.31
   3   4  -2    3.92    0.19
  -3  -4   2    4.01    0.22
  -3  -4   2    4.14    0.17
   2   4  -2   10.48    0.26
   2   4  -2   10.91    0.30
  -2  -4   2   10.68    0.26
  -2  -4   2   10.90    0.32
   1   4  -2  162.15    2.38
   1   4  -2  160.04    2.42
  -1  -4   2  158.21    2.41
  -1  -4   2  165.66    2.30
   0   4  -2    4.99    0.22
   0   4  -2    4.89    0.15
   0  -4   2    5.05    0.10
   0  -4   2    4.84    0.17
  -1   4  -2   20.97    0.38
  -1   4  -2   20.40    0.54
   1  -4   2   21.29    0.36
   1  -4   2   21.19    0.44
  -2   4  -2   41.77    0.70
   2  -4   2   41.81    0.71
  -3   4  -2    2.87    0.21
  -3   4  -2    3.02    0.24
   3  -4   2    2.89    0.15
  -4   4  -2    0.07    0.09
  -4   4  -2    0.17    0.11
   4  -4   2    0.17    0.07
  -5   4  -2    1.80    0.24
   5  -4   2    1.95    0.19
   6   3  -2    0.51    0.14
  -6  -3   2    0.51    0.18
   5   3  -2    5.14    0.28
   5   3  -2    6.04    0.26
  -5  -3   2    5.77    0.34
   4   3  -2   39.43    0.85
   4   3  -2   39.86    0.79
  -4  -3   2   40.39    0.91
   3   3  -2    0.45    0.08
  -3  -3   2    0.50    0.08
  -3  -3   2    0.40    0.09
   2   3  -2   24.93    0.50
  -2  -3   2   25.54    0.43
  -2  -3   2   25.19    0.46
  -2  -3   2   24.51    0.54
   1   3  -2   18.65    0.39
   1   3  -2   18.36    0.37
  -1  -3   2   17.86    0.39
  -1  -3   2   18.75    0.32
   0   3  -2    0.42    0.08
   0   3  -2    0.40    0.05
   0  -3   2    0.46    0.06
   0  -3   2    0.43    0.02
  -1   3  -2    3.72    0.20
  -1   3  -2    3.79    0.12
   1  -3   2    4.05    0.11
   1  -3   2    3.77    0.14
  -2   3  -2    1.72    0.14
  -2   3  -2    1.72    0.18
  -2   3  -2    1.74    0.09
   2  -3   2    1.71    0.10
  -3   3  -2    0.75    0.13
  -3   3  -2    0.73    0.12
   3  -3   2    0.58    0.09
  -4   3  -2    4.86    0.29
  -4   3  -2    5.36    0.31
   4  -3   2    5.17    0.24
  -5   3  -2    0.14    0.10
   5  -3   2    0.09    0.07
   6   2  -2    2.65    0.26
  -6  -2   2    2.66    0.31
   5   2  -2   22.66    0.63
  -5  -2   2   23.33    0.70
   4   2  -2    4.76    0.24
   4   2  -2    5.18    0.21
  -4  -2   2    4.77    0.27
   3   2  -2    0.70    0.09
   3   2  -2    0.67    0.08
  -3  -2   2    0.63    0.11
   2   2  -2    0.88    0.08
  -2  -2   2    0.92    0.07
  -2  -2   2    0.80    0.10
  -2  -2   2    0.92    0.05
   1   2  -2   41.22    0.67
   1   2  -2   41.47    0.69
  -1  -2   2   41.46    0.63
  -1  -2   2   40.54    0.70
   0   2  -2    5.34    0.19
   0   2  -2    5.33    0.14
   0  -2   2    5.40    0.15
  -1   2  -2   -0.01    0.04
  -1   2  -2    0.02    0.02
   1  -2   2    0.06    0.02
   1  -2   2    0.03    0.02
  -2   2  -2   17.55    0.35
  -2   2  -2   17.95    0.47
  -2   2  -2   16.82    0.43
   2  -2   2   18.50    0.38
  -3   2  -2    1.07    0.14
  -3   2  -2    1.07    0.14
   3  -2   2    0.88    0.10
   3  -2   2    1.05    0.12
  -4   2  -2   49.18    1.05
   4  -2   2   47.93    0.95
  -5   2  -2    0.83    0.17
   5  -2   2    0.98    0.15
   6   1  -2   -0.01    0.09
  -6  -1   2    0.04    0.10
   5   1  -2    2.10    0.20
  -5  -1   2    2.86    0.24
   4   1  -2    0.68    0.09
   4   1  -2    0.70    0.11
  -4  -1   2    0.76    0.13
   3   1  -2    0.34    0.07
   3   1  -2    0.37    0.06
  -3  -1   2    0.39    0.09
   2   1  -2   33.05    0.58
   2   1  -2   31.69    0.60
  -2  -1   2   33.74    0.64
  -2  -1   2   32.86    0.53
   1   1  -2   20.98    0.36
   1   1  -2   20.20    0.37
  -1  -1   2   20.87    0.37
  -1  -1   2   20.84    0.40
   0   1  -2   19.14    0.32
   0  -1   2   18.60    0.33
  -1   1  -2  378.30    5.49
  -1   1  -2  356.60    5.42
  -1   1  -2  368.68    5.31
  -1   1  -2  372.21    5.64
  -2   1  -2    1.03    0.08
  -2   1  -2    0.84    0.10
  -2   1  -2    0.84    0.09
  -3   1  -2    0.20    0.07
  -3   1  -2    0.16    0.07
   3  -1   2    0.10    0.04
   3  -1   2    0.18    0.06
  -4   1  -2    6.80    0.31
   4  -1   2    6.74    0.28
  -5   1  -2    0.11    0.08
   5  -1   2    0.00    0.06
  -6   1  -2   -0.03    0.11
   6  -1   2    0.13    0.09
  -6   0   2    1.01    0.28
   5   0  -2    1.91    0.20
  -5   0   2    1.85    0.24
   4   0  -2    2.01    0.18
  -4   0   2    1.74    0.19
   3   0  -2   10.16    0.31
   3   0  -2   10.74    0.26
  -3   0   2    9.93    0.34
   2   0  -2    9.96    0.26
   2   0  -2   10.16    0.23
  -2   0   2   10.63    0.24
  -2   0   2   11.00    0.30
   1   0  -2    0.49    0.05
   1   0  -2    0.44    0.04
  -1   0   2    0.50    0.05
  -1   0   2    0.45    0.06
   0   0  -2  257.06    3.76
   0   0   2  257.70    3.93
   0   0   2  260.02    3.75
  -1   0  -2  965.07   16.30
  -1   0  -2 1000.00   17.91
  -1   0  -2  951.78   16.41
  -1   0  -2  970.06   15.74
  -2   0  -2    0.92    0.09
  -2   0  -2    1.03    0.09
  -2   0  -2    0.87    0.07
  -2   0  -2    0.96    0.10
  -3   0  -2    6.63    0.25
  -3   0  -2    6.46    0.22
  -3   0  -2    6.53    0.25
   3   0   2    6.75    0.20
  -4   0  -2    9.17    0.36
   4   0   2    8.58    0.33
  -5   0  -2    5.40    0.32
   5   0   2    6.40    0.31
  -6   0  -2    1.02    0.20
   6   0   2    0.82    0.16
   5  -1  -2    4.46    0.26
  -5   1   2    5.17    0.31
   4  -1  -2   38.62    0.81
  -4   1   2   38.42    0.88
   3  -1  -2    9.83    0.30
   3  -1  -2    9.77    0.23
  -3   1   2    9.89    0.29
  -3   1   2    9.27    0.33
   2  -1  -2   31.82    0.52
   2  -1  -2   32.57    0.59
  -2   1   2   32.18    0.62
  -2   1   2   31.79    0.58
   1  -1  -2    0.00    0.02
   1  -1  -2   -0.02    0.03
  -1   1   2    0.00    0.03
  -1   1   2    0.03    0.03
   0  -1  -2    9.07    0.18
   0  -1  -2    8.89    0.16
   0   1   2    8.81    0.20
  -1  -1  -2   62.48    0.93
  -1  -1  -2   64.00    0.94
   1   1   2   61.71    0.97
  -2  -1  -2   48.23    0.82
  -2  -1  -2   47.81    0.79
  -2  -1  -2   48.38    0.82
   2   1   2   48.55    0.79
  -3  -1  -2   14.36    0.37
  -3  -1  -2   14.38    0.35
  -3  -1  -2   14.46    0.39
   3   1   2   14.22    0.34
  -4  -1  -2    0.36    0.08
  -4  -1  -2    0.38    0.09
   4   1   2    0.37    0.07
  -5  -1  -2    0.88    0.16
   5   1   2    0.90    0.15
  -6  -1  -2    8.33    0.43
   6   1   2    7.37    0.38
   5  -2  -2    6.76    0.32
  -5   2   2    7.14    0.38
   4  -2  -2    6.20    0.27
  -4   2   2    6.45    0.31
   3  -2  -2   17.48    0.42
  -3   2   2   16.83    0.47
  -3   2   2   17.04    0.44
   2  -2  -2    0.38    0.06
   2  -2  -2    0.47    0.04
  -2   2   2    0.57    0.09
  -2   2   2    0.51    0.08
   1  -2  -2    1.71    0.08
   1  -2  -2    1.62    0.05
  -1   2   2    1.70    0.10
  -1   2   2    1.86    0.09
   0  -2  -2   62.61    0.95
   0  -2  -2   64.34    0.94
   0   2   2   64.97    0.92
   0   2   2   65.30    0.99
  -1  -2  -2  111.38    1.59
  -1  -2  -2  107.05    1.59
  -1  -2  -2  107.28    1.64
   1   2   2  113.51    1.61
  -2  -2  -2    1.05    0.08
  -2  -2  -2    0.91    0.08
   2   2   2    0.91    0.08
   2   2   2    0.98    0.07
  -3  -2  -2   10.93    0.30
  -3  -2  -2   11.67    0.34
   3   2   2   11.20    0.30
   3   2   2   11.08    0.27
  -4  -2  -2    2.03    0.17
  -4  -2  -2    1.95    0.14
   4   2   2    1.97    0.14
  -5  -2  -2    1.52    0.19
   5   2   2    1.10    0.16
  -6  -2  -2   13.12    0.54
   6   2   2   12.52    0.49
   5  -3  -2    2.07    0.19
  -5   3   2    2.34    0.27
   4  -3  -2    0.66    0.11
  -4   3   2    0.70    0.14
   3  -3  -2    5.77    0.22
  -3   3   2    5.32    0.25
  -3   3   2    5.27    0.25
   2  -3  -2    0.78    0.08
   2  -3  -2    0.85    0.03
  -2   3   2    0.95    0.11
  -2   3   2    0.70    0.10
   1  -3  -2   47.45    0.74
  -1   3   2   47.55    0.79
  -1   3   2   46.59    0.83
   0  -3  -2  104.10    1.45
   0  -3  -2   96.20    1.49
   0   3   2   99.90    1.52
  -1  -3  -2   24.56    0.42
  -1  -3  -2   24.80    0.41
   1   3   2   25.08    0.44
   1   3   2   24.31    0.44
  -2  -3  -2    0.54    0.07
  -2  -3  -2    0.69    0.07
   2   3   2    0.64    0.06
   2   3   2    0.49    0.07
  -3  -3  -2   22.67    0.48
  -3  -3  -2   22.35    0.51
   3   3   2   21.78    0.48
  -4  -3  -2    0.59    0.11
  -4  -3  -2    0.44    0.09
   4   3   2    0.64    0.10
  -5  -3  -2    0.37    0.10
  -5  -3  -2    0.35    0.11
   5   3   2    0.31    0.08
  -6  -3  -2    5.15    0.34
   6   3   2    4.84    0.32
   5  -4  -2    0.09    0.07
  -5   4   2    0.03    0.08
   4  -4  -2   -0.03    0.05
  -4   4   2   -0.07    0.06
   3  -4  -2    1.18    0.12
  -3   4   2    0.91    0.14
  -3   4   2    0.98    0.13
   2  -4  -2    7.38    0.22
  -2   4   2    7.08    0.28
  -2   4   2    7.80    0.26
   1  -4  -2   18.04    0.34
  -1   4   2   17.97    0.39
  -1   4   2   17.86    0.44
   0  -4  -2  227.38    3.31
   0  -4  -2  226.53    3.40
   0   4   2  223.70    3.31
   0   4   2  230.77    3.29
  -1  -4  -2    5.75    0.15
  -1  -4  -2    5.95    0.16
   1   4   2    6.04    0.18
   1   4   2    5.60    0.17
  -2  -4  -2    0.39    0.06
  -2  -4  -2    0.39    0.06
   2   4   2    0.27    0.06
   2   4   2    0.30    0.05
  -3  -4  -2    1.01    0.12
  -3  -4  -2    0.82    0.10
   3   4   2    0.73    0.09
  -4  -4  -2    0.02    0.05
  -4  -4  -2    0.00    0.05
   4   4   2   -0.05    0.04
  -5  -4  -2    2.77    0.23
  -5  -4  -2    2.99    0.20
   5   4   2    2.80    0.19
  -6  -4  -2    0.43    0.14
   6   4   2    0.10    0.09
   5  -5  -2    3.03    0.21
  -5   5   2    2.84    0.30
   4  -5  -2    0.44    0.09
  -4   5   2    0.49    0.12
   3  -5  -2   21.01    0.49
  -3   5   2   21.94    0.62
  -3   5   2   21.87    0.59
   2  -5  -2    0.06    0.04
  -2   5   2    0.06    0.06
  -2   5   2    0.08    0.05
   1  -5  -2    4.45    0.14
  -1   5   2    4.13    0.09
  -1   5   2    4.01    0.18
  -1   5   2    4.22    0.21
   0  -5  -2   21.58    0.40
   0  -5  -2   22.02    0.39
   0   5   2   22.28    0.49
   0   5   2   21.75    0.39
  -1  -5  -2   26.28    0.47
  -1  -5  -2   26.40    0.47
   1   5   2   27.02    0.52
   1   5   2   26.05    0.50
  -2  -5  -2   10.75    0.28
  -2  -5  -2   10.63    0.27
   2   5   2   10.81    0.29
   2   5   2   10.64    0.25
  -3  -5  -2   20.09    0.46
  -3  -5  -2   20.56    0.49
   3   5   2   20.29    0.48
  -4  -5  -2    2.12    0.15
  -4  -5  -2    2.09    0.17
   4   5   2    2.03    0.16
  -5  -5  -2    6.51    0.29
  -5  -5  -2    6.25    0.33
   5   5   2    6.00    0.28
  -6  -5  -2    5.89    0.32
  -6  -5  -2    5.64    0.36
   5  -6  -2   -0.01    0.07
  -5   6   2   -0.04    0.09
   4  -6  -2    5.31    0.24
  -4   6   2    5.33    0.32
  -4   6   2    5.49    0.35
   3  -6  -2    7.38    0.25
  -3   6   2    7.57    0.34
  -3   6   2    7.63    0.37
   2  -6  -2    2.34    0.12
  -2   6   2    2.41    0.17
  -2   6   2    2.54    0.20
   1  -6  -2    3.94    0.16
   1  -6  -2    4.62    0.15
  -1   6   2    4.20    0.23
   0  -6  -2    3.48    0.13
   0  -6  -2    3.60    0.12
   0   6   2    3.44    0.19
   0   6   2    3.52    0.12
  -1  -6  -2   58.66    0.96
  -1  -6  -2   60.17    0.95
   1   6   2   61.40    0.99
   1   6   2   60.15    1.04
  -2  -6  -2   14.04    0.33
  -2  -6  -2   13.72    0.34
   2   6   2   13.72    0.33
   2   6   2   13.39    0.35
  -3  -6  -2   23.33    0.54
  -3  -6  -2   23.73    0.52
   3   6   2   23.55    0.55
  -4  -6  -2    0.61    0.12
  -4  -6  -2    0.55    0.10
   4   6   2    0.45    0.10
  -5  -6  -2    7.99    0.37
  -5  -6  -2    7.51    0.32
   5   6   2    7.44    0.32
   6   6   2    0.20    0.09
   5  -7  -2    0.55    0.13
   4  -7  -2    2.62    0.18
  -4   7   2    2.74    0.31
  -4   7   2    2.18    0.24
   3  -7  -2   26.63    0.57
  -3   7   2   25.02    0.69
  -3   7   2   26.24    0.77
   2  -7  -2    0.33    0.06
  -2   7   2    0.33    0.09
  -2   7   2    0.35    0.11
   1  -7  -2    4.10    0.18
   1  -7  -2    4.30    0.15
  -1   7   2    4.23    0.25
   0  -7  -2    9.00    0.22
   0  -7  -2    9.04    0.25
   0   7   2    9.05    0.33
   0   7   2    8.84    0.23
  -1  -7  -2    0.43    0.06
  -1  -7  -2    0.44    0.07
   1   7   2    0.61    0.10
   1   7   2    0.52    0.07
  -2  -7  -2    6.46    0.23
  -2  -7  -2    6.64    0.22
   2   7   2    6.23    0.23
   2   7   2    6.75    0.23
  -3  -7  -2    1.00    0.12
  -3  -7  -2    0.90    0.11
   3   7   2    0.91    0.12
  -4  -7  -2    7.56    0.32
  -4  -7  -2    6.94    0.28
   4   7   2    7.23    0.31
  -5  -7  -2    8.47    0.57
  -5  -7  -2    7.73    0.34
   5   7   2    8.45    0.35
   6   7   2    1.79    0.23
   4  -8  -2    0.09    0.07
  -4   8   2    0.10    0.12
  -4   8   2    0.09    0.10
   3  -8  -2    1.91    0.14
  -3   8   2    1.71    0.25
  -3   8   2    1.93    0.22
   2  -8  -2    4.17    0.18
   2  -8  -2    4.66    0.21
  -2   8   2    4.35    0.30
   1  -8  -2   22.81    0.46
   1  -8  -2   23.32    0.51
  -1   8   2   24.17    0.67
   0  -8  -2   15.51    0.37
   0  -8  -2   15.12    0.33
   0   8   2   14.62    0.47
   0   8   2   15.03    0.33
  -1  -8  -2   12.40    0.33
  -1  -8  -2   12.30    0.30
   1   8   2   12.38    0.33
   1   8   2   12.31    0.39
  -2  -8  -2   24.70    0.55
  -2  -8  -2   25.74    0.53
   2   8   2   24.64    0.57
   2   8   2   27.02    0.78
  -3  -8  -2    8.96    0.29
  -3  -8  -2    9.14    0.32
   3   8   2    8.95    0.33
  -4  -8  -2    2.18    0.21
  -4  -8  -2    2.09    0.19
   4   8   2    2.45    0.19
  -5  -8  -2    6.30    0.30
   5   8   2    6.21    0.31
   4  -9  -2    0.08    0.06
  -4   9   2   -0.05    0.10
   3  -9  -2   -0.01    0.07
   3  -9  -2   -0.04    0.05
  -3   9   2    0.04    0.10
   2  -9  -2    0.20    0.08
   2  -9  -2    0.15    0.05
  -2   9   2    0.12    0.10
   1  -9  -2    4.90    0.22
   1  -9  -2    4.95    0.18
  -1   9   2    4.89    0.31
   0  -9  -2    0.01    0.03
   0  -9  -2   -0.02    0.04
   0   9   2    0.06    0.08
  -1  -9  -2    0.14    0.05
  -1  -9  -2    0.19    0.06
   1   9   2    0.19    0.06
   1   9   2    0.22    0.08
  -2  -9  -2    9.29    0.28
  -2  -9  -2    8.97    0.30
   2   9   2    8.81    0.31
  -3  -9  -2    4.72    0.22
  -3  -9  -2    4.93    0.24
   3   9   2    4.78    0.24
  -4  -9  -2    0.87    0.13
   4   9   2    0.97    0.14
  -5  -9  -2    0.07    0.07
   5   9   2    0.07    0.08
   3 -10  -2    0.84    0.14
   3 -10  -2    0.85    0.11
  -3  10   2    0.86    0.21
   2 -10  -2    3.33    0.21
   2 -10  -2    3.07    0.16
  -2  10   2    3.46    0.35
   1 -10  -2    0.62    0.08
   1 -10  -2    0.64    0.11
  -1  10   2    0.60    0.15
   0 -10  -2    5.16    0.19
   0 -10  -2    5.01    0.23
   0  10   2    4.90    0.30
  -1 -10  -2    8.07    0.29
  -1 -10  -2    7.94    0.25
   1  10   2    7.17    0.34
   1  10   2    8.18    0.27
  -2 -10  -2   78.16    1.31
  -2 -10  -2   77.74    1.36
   2  10   2   78.48    1.37
  -3 -10  -2   15.15    0.42
   3  10   2   15.97    0.47
  -4 -10  -2    3.12    0.21
   4  10   2    3.04    0.22
  -5 -10  -2    0.08    0.08
   5  10   2   -0.11    0.08
   3 -11  -2    1.40    0.18
  -3  11   2    1.15    0.25
   2 -11  -2    0.82    0.14
  -2  11   2    0.83    0.21
   1 -11  -2   21.33    0.55
   1 -11  -2   20.09    0.47
  -1  11   2   21.18    0.73
   0 -11  -2    0.47    0.10
   0 -11  -2    0.46    0.08
   0  11   2    0.38    0.12
  -1 -11  -2    0.04    0.06
  -1 -11  -2    0.01    0.04
   1  11   2   -0.05    0.07
  -2 -11  -2   -0.04    0.05
   2  11   2    0.04    0.06
  -3 -11  -2    0.13    0.07
   3  11   2    0.18    0.08
  -4 -11  -2    1.91    0.19
   4  11   2    2.13    0.22
  -5 -11  -2    0.84    0.15
   2 -12  -2    6.38    0.32
  -2  12   2    6.47    0.46
   1 -12  -2    1.68    0.18
  -1  12   2    1.96    0.27
   0 -12  -2    0.93    0.14
   0  12   2    1.26    0.21
   1  12   2    0.07    0.09
   2  12   2    0.26    0.08
   3  12   2    1.02    0.15
   4  12   2    0.97    0.16
   2 -13  -2   -0.02    0.08
   1 -13  -2    0.42    0.12
  -1  13   2    0.46    0.17
   0  13   2    1.96    0.28
   3  13   2    0.43    0.11
   0  14   2   -0.12    0.11
   3  14   2    1.02    0.18
   0  13  -3    1.55    0.39
   2  12  -3    1.43    0.18
  -2 -12   3    1.50    0.21
  -1 -12   3    1.48    0.21
   0  12  -3    1.96    0.29
   0 -12   3    1.92    0.23
  -1  12  -3    3.05    0.39
   3  11  -3    0.12    0.08
  -3 -11   3   -0.06    0.09
   2  11  -3    2.04    0.20
  -2 -11   3    1.72    0.22
  -1 -11   3    0.08    0.09
   0  11  -3    0.07    0.11
   0 -11   3    0.07    0.09
  -1  11  -3    0.06    0.13
   1 -11   3    0.00    0.07
  -2  11  -3    2.21    0.36
   2 -11   3    2.15    0.27
   4  10  -3   -0.06    0.08
  -4 -10   3   -0.02    0.09
   3  10  -3    5.49    0.29
  -3 -10   3    5.63    0.34
   2  10  -3    0.18    0.08
  -2 -10   3    0.25    0.10
   1  10  -3    1.73    0.23
   1  10  -3    1.62    0.16
  -1 -10   3    1.48    0.19
   0  10  -3   16.34    0.63
   0 -10   3   17.46    0.53
  -1  10  -3    4.53    0.36
   1 -10   3    5.07    0.28
  -2  10  -3    1.28    0.25
   2 -10   3    1.24    0.18
   4   9  -3   -0.02    0.06
  -4  -9   3    0.05    0.10
   3   9  -3    1.62    0.18
  -3  -9   3    1.96    0.22
   2   9  -3    1.17    0.14
  -2  -9   3    1.22    0.17
   1   9  -3   15.99    0.55
   1   9  -3   16.23    0.44
  -1  -9   3   16.80    0.50
   0   9  -3   25.47    0.77
   0  -9   3   24.78    0.63
  -1   9  -3    1.44    0.23
   1  -9   3    1.19    0.15
  -2   9  -3    0.04    0.12
   2  -9   3    0.22    0.09
  -3   9  -3    0.12    0.14
   3  -9   3    0.08    0.09
  -5  -8   3    1.39    0.27
   4   8  -3    5.30    0.27
  -4  -8   3    5.01    0.32
   3   8  -3    2.64    0.19
  -3  -8   3    2.52    0.21
   2   8  -3    0.96    0.12
  -2  -8   3    1.17    0.16
   1   8  -3    0.00    0.04
   1   8  -3   -0.02    0.06
  -1  -8   3    0.05    0.06
   0   8  -3   28.12    0.78
   0   8  -3   28.94    0.59
   0  -8   3   28.34    0.66
  -1   8  -3   13.05    0.53
   1  -8   3   12.69    0.40
  -2   8  -3    6.08    0.39
   2  -8   3    6.16    0.29
  -3   8  -3    1.12    0.24
   3  -8   3    1.14    0.16
  -4   8  -3    3.74    0.40
   5   7  -3   -0.08    0.05
  -5  -7   3   -0.06    0.08
   4   7  -3    0.04    0.07
  -4  -7   3   -0.03    0.08
   3   7  -3    0.77    0.12
  -3  -7   3    0.73    0.14
   2   7  -3    4.62    0.22
  -2  -7   3    4.98    0.25
   1   7  -3    2.62    0.15
   1   7  -3    3.10    0.21
  -1  -7   3    2.73    0.18
   0   7  -3   11.77    0.31
   0   7  -3   11.39    0.44
   0  -7   3   11.37    0.35
  -1   7  -3   19.64    0.63
   1  -7   3   19.94    0.50
  -2   7  -3    7.03    0.40
   2  -7   3    6.97    0.29
  -3   7  -3    0.04    0.10
   3  -7   3    0.06    0.07
  -4   7  -3    1.13    0.22
   4  -7   3    1.24    0.18
   5   6  -3    0.05    0.07
  -5  -6   3    0.05    0.10
   4   6  -3    8.85    0.34
  -4  -6   3    8.51    0.39
   3   6  -3   90.83    1.56
  -3  -6   3   92.86    1.65
   2   6  -3    1.71    0.13
  -2  -6   3    1.86    0.18
   1   6  -3    4.02    0.18
   1   6  -3    4.14    0.23
  -1  -6   3    3.99    0.20
   0   6  -3    0.65    0.13
   0   6  -3    0.91    0.09
   0  -6   3    0.50    0.08
  -1   6  -3   16.92    0.55
  -1   6  -3   16.07    0.36
   1  -6   3   17.10    0.43
  -2   6  -3    0.36    0.12
   2  -6   3    0.40    0.08
  -3   6  -3    1.49    0.23
   3  -6   3    1.56    0.17
  -4   6  -3    0.10    0.12
   4  -6   3    0.37    0.11
   5   5  -3    0.04    0.06
   5   5  -3    0.06    0.07
  -5  -5   3   -0.07    0.08
   4   5  -3    0.63    0.11
   4   5  -3    0.86    0.13
  -4  -5   3    1.02    0.16
   3   5  -3    3.18    0.18
  -3  -5   3    2.64    0.20
  -3  -5   3    3.05    0.15
   2   5  -3    9.60    0.30
  -2  -5   3   10.01    0.33
  -2  -5   3    9.59    0.24
   1   5  -3   20.81    0.45
   1   5  -3   21.33    0.53
  -1  -5   3   20.40    0.48
  -1  -5   3   21.12    0.36
   0   5  -3   10.03    0.26
   0   5  -3    9.51    0.36
   0  -5   3   10.24    0.29
  -1   5  -3    1.12    0.08
  -1   5  -3    1.39    0.18
   1  -5   3    1.22    0.10
  -2   5  -3    6.29    0.34
   2  -5   3    5.89    0.24
  -3   5  -3    2.30    0.27
   3  -5   3    2.32    0.16
  -4   5  -3    0.08    0.10
  -5   5  -3    6.60    0.42
   5   4  -3    7.23    0.33
   5   4  -3    7.15    0.30
  -5  -4   3    7.31    0.39
   4   4  -3    2.74    0.19
   4   4  -3    2.43    0.17
  -4  -4   3    2.56    0.22
   3   4  -3    0.69    0.10
  -3  -4   3    0.70    0.12
   2   4  -3    6.10    0.22
  -2  -4   3    5.88    0.18
   1   4  -3    0.44    0.06
   1   4  -3    0.48    0.09
  -1  -4   3    0.32    0.06
  -1  -4   3    0.39    0.04
   0   4  -3    4.61    0.16
   0   4  -3    5.08    0.23
   0  -4   3    4.66    0.09
   0  -4   3    4.48    0.17
  -1   4  -3    0.17    0.08
  -1   4  -3    0.27    0.05
   1  -4   3    0.30    0.03
   1  -4   3    0.39    0.06
  -2   4  -3   30.95    0.57
  -2   4  -3   30.75    0.78
   2  -4   3   31.56    0.55
   2  -4   3   31.69    0.63
  -3   4  -3    2.37    0.19
  -3   4  -3    2.06    0.23
   3  -4   3    2.21    0.13
  -4   4  -3    0.33    0.13
  -4   4  -3    0.20    0.10
   4  -4   3    0.35    0.08
  -5   4  -3   10.98    0.51
   5   3  -3    0.10    0.06
   5   3  -3    0.09    0.07
  -5  -3   3    0.18    0.11
   4   3  -3    2.65    0.17
   4   3  -3    3.05    0.19
  -4  -3   3    2.46    0.24
   3   3  -3   10.70    0.33
   3   3  -3   10.89    0.32
  -3  -3   3   11.28    0.38
   2   3  -3    7.98    0.24
  -2  -3   3    7.47    0.27
  -2  -3   3    7.51    0.21
   1   3  -3   19.30    0.40
   1   3  -3   19.00    0.45
  -1  -3   3   19.95    0.33
   0   3  -3    7.18    0.19
   0   3  -3    7.05    0.27
   0  -3   3    7.32    0.21
  -1   3  -3    0.00    0.05
  -1   3  -3   -0.01    0.02
   1  -3   3   -0.03    0.03
   1  -3   3    0.01    0.02
  -2   3  -3   24.16    0.48
  -2   3  -3   24.66    0.64
   2  -3   3   24.74    0.46
   2  -3   3   24.55    0.51
  -3   3  -3    0.99    0.16
  -3   3  -3    0.82    0.13
   3  -3   3    0.96    0.10
  -4   3  -3    0.32    0.12
  -4   3  -3    0.42    0.12
   4  -3   3    0.49    0.09
  -5   3  -3    0.67    0.16
   5  -3   3    0.36    0.10
   5   2  -3    4.73    0.27
  -5  -2   3    4.40    0.30
   4   2  -3   84.80    1.41
   4   2  -3   83.64    1.47
  -4  -2   3   83.46    1.56
   3   2  -3    0.19    0.06
   3   2  -3    0.35    0.07
  -3  -2   3    0.33    0.08
   2   2  -3   36.12    0.64
   2   2  -3   33.80    0.63
  -2  -2   3   34.67    0.69
  -2  -2   3   36.61    0.60
   1   2  -3    1.55    0.07
   1   2  -3    1.50    0.08
   1   2  -3    1.17    0.10
  -1  -2   3    1.54    0.10
   0   2  -3    0.05    0.05
   0   2  -3    0.00    0.02
   0  -2   3    0.02    0.03
  -1   2  -3    7.93    0.20
  -1   2  -3    8.24    0.29
   1  -2   3    8.42    0.21
   1  -2   3    8.32    0.17
  -2   2  -3   70.33    1.29
  -2   2  -3   70.79    1.14
  -2   2  -3   71.31    1.23
   2  -2   3   72.64    1.13
  -3   2  -3    0.09    0.08
  -3   2  -3    0.13    0.07
  -3   2  -3    0.25    0.07
   3  -2   3    0.15    0.05
  -4   2  -3   -0.04    0.07
  -4   2  -3   -0.01    0.06
   4  -2   3    0.04    0.06
  -5   2  -3    0.48    0.13
   5  -2   3    0.51    0.12
   5   1  -3    0.18    0.08
  -5  -1   3    0.13    0.09
   4   1  -3   38.19    0.73
   4   1  -3   37.15    0.79
  -4  -1   3   37.17    0.87
   3   1  -3   20.61    0.44
   3   1  -3   19.76    0.47
  -3  -1   3   20.84    0.53
   2   1  -3   12.83    0.29
   2   1  -3   12.58    0.30
  -2  -1   3   12.99    0.28
  -2  -1   3   11.75    0.33
   1   1  -3   31.04    0.50
   1   1  -3   30.03    0.52
  -1  -1   3   30.48    0.55
  -1  -1   3   30.68    0.56
   0   1  -3   89.29    1.34
   0   1  -3   91.23    1.44
   0  -1   3   91.18    1.34
  -1   1  -3   27.10    0.48
  -1   1  -3   27.13    0.43
  -1   1  -3   26.75    0.58
   1  -1   3   27.73    0.47
  -2   1  -3    0.17    0.04
  -2   1  -3    0.08    0.06
  -2   1  -3    0.42    0.06
  -2   1  -3    0.12    0.06
  -3   1  -3    0.20    0.08
  -3   1  -3    0.14    0.07
   3  -1   3    0.09    0.05
  -4   1  -3    1.53    0.18
   4  -1   3    1.36    0.15
  -5   1  -3    0.94    0.17
   5  -1   3    1.19    0.16
  -6   1  -3    0.51    0.16
   6  -1   3    0.26    0.12
   5   0  -3    0.87    0.14
  -5   0   3    0.97    0.18
   4   0  -3    0.92    0.13
  -4   0   3    0.55    0.13
   3   0  -3   13.10    0.36
   3   0  -3   13.57    0.32
  -3   0   3   13.76    0.41
   2   0  -3    1.73    0.09
   2   0  -3    1.78    0.10
  -2   0   3    1.79    0.10
  -2   0   3    1.64    0.12
   1   0  -3   22.87    0.39
   1   0  -3   22.60    0.40
  -1   0   3   23.17    0.43
  -1   0   3   22.25    0.43
   0   0  -3   81.77    1.21
   0   0  -3   82.97    1.20
   0   0   3   80.16    1.26
   0   0   3   80.49    1.19
  -1   0  -3  414.78    6.08
  -1   0  -3  419.69    6.19
  -1   0  -3  420.50    6.46
   1   0   3  430.74    6.11
  -2   0  -3   25.77    0.51
  -2   0  -3   25.95    0.52
  -2   0  -3   26.19    0.48
  -2   0  -3   25.20    0.57
  -3   0  -3    5.25    0.22
  -3   0  -3    4.86    0.19
  -3   0  -3    5.19    0.24
   3   0   3    4.63    0.17
  -4   0  -3   25.76    0.65
   4   0   3   26.24    0.63
  -5   0  -3    4.54    0.29
   5   0   3    4.63    0.27
  -6   0  -3    1.63    0.24
   6   0   3    2.17    0.24
   5  -1  -3   -0.09    0.06
  -5   1   3    0.02    0.08
   4  -1  -3    9.31    0.33
  -4   1   3    9.54    0.38
   3  -1  -3    7.29    0.25
   3  -1  -3    7.45    0.20
  -3   1   3    6.50    0.27
  -3   1   3    7.13    0.24
   2  -1  -3   78.55    1.25
   2  -1  -3   82.21    1.20
  -2   1   3   78.90    1.26
  -2   1   3   79.59    1.31
   1  -1  -3   14.54    0.27
   1  -1  -3   15.00    0.28
  -1   1   3   14.71    0.32
  -1   1   3   14.61    0.31
   0  -1  -3  194.04    2.86
   0  -1  -3  190.57    3.78
   0   1   3  194.63    2.80
   0   1   3  190.00    2.84
  -1  -1  -3  822.57   12.18
  -1  -1  -3  853.05   11.94
   1   1   3  843.43   12.21
  -2  -1  -3   20.56    0.44
  -2  -1  -3   19.83    0.47
  -2  -1  -3   20.81    0.40
  -2  -1  -3   20.35    0.42
  -3  -1  -3    3.79    0.17
  -3  -1  -3    3.70    0.19
  -3  -1  -3    3.93    0.19
   3   1   3    3.83    0.16
  -4  -1  -3    0.38    0.10
  -4  -1  -3    0.30    0.08
   4   1   3    0.32    0.07
  -5  -1  -3    0.89    0.16
   5   1   3    1.00    0.16
  -6  -1  -3   -0.08    0.09
   6   1   3   -0.06    0.07
   5  -2  -3   17.43    0.52
  -5   2   3   18.13    0.61
   4  -2  -3   15.22    0.44
  -4   2   3   14.45    0.49
   3  -2  -3    1.13    0.12
  -3   2   3    0.95    0.12
  -3   2   3    0.79    0.12
   2  -2  -3  187.35    2.71
   2  -2  -3  189.70    2.77
  -2   2   3  186.49    2.82
  -2   2   3  194.63    2.84
   1  -2  -3    6.08    0.16
   1  -2  -3    6.35    0.14
  -1   2   3    6.47    0.18
  -1   2   3    6.02    0.20
   0  -2  -3   71.23    1.08
   0  -2  -3   71.33    1.05
   0   2   3   72.59    1.02
   0   2   3   71.16    1.12
  -1  -2  -3   48.25    0.80
  -1  -2  -3   47.70    0.74
  -1  -2  -3   48.34    0.71
   1   2   3   48.32    0.80
  -2  -2  -3    3.93    0.14
  -2  -2  -3    3.92    0.14
   2   2   3    3.58    0.15
  -3  -2  -3    2.43    0.13
  -3  -2  -3    2.51    0.15
   3   2   3    2.50    0.13
   3   2   3    2.69    0.14
  -4  -2  -3    0.76    0.12
   4   2   3    0.91    0.11
  -5  -2  -3    4.20    0.27
  -5  -2  -3    3.95    0.22
  -6  -2  -3    0.02    0.09
   6   2   3    0.09    0.09
   5  -3  -3    1.17    0.16
  -5   3   3    1.18    0.20
   4  -3  -3    2.21    0.16
  -4   3   3    2.56    0.24
   3  -3  -3    1.34    0.13
  -3   3   3    1.05    0.13
  -3   3   3    1.75    0.15
   2  -3  -3   56.79    0.83
   2  -3  -3   53.94    0.93
  -2   3   3   56.52    1.01
  -2   3   3   57.42    0.99
   1  -3  -3    0.59    0.06
   1  -3  -3    0.68    0.05
  -1   3   3    0.76    0.08
  -1   3   3    0.67    0.09
   0  -3  -3   54.56    0.86
   0  -3  -3   54.54    0.83
   0   3   3   56.20    0.81
   0   3   3   55.13    0.91
  -1  -3  -3   10.53    0.19
  -1  -3  -3   10.41    0.22
  -1  -3  -3   10.21    0.27
   1   3   3   11.07    0.26
  -2  -3  -3   12.17    0.28
  -2  -3  -3   11.63    0.28
   2   3   3   11.98    0.29
   2   3   3   11.99    0.28
  -3  -3  -3    2.06    0.13
  -3  -3  -3    2.10    0.13
   3   3   3    2.22    0.13
  -4  -3  -3    0.07    0.06
  -4  -3  -3    0.02    0.06
   4   3   3    0.04    0.05
  -5  -3  -3    0.70    0.13
  -5  -3  -3    0.43    0.11
   5   3   3    0.53    0.10
  -6  -3  -3   20.06    0.66
   6   3   3   18.59    0.63
   5  -4  -3   -0.03    0.06
  -5   4   3    0.21    0.12
   4  -4  -3    0.22    0.08
  -4   4   3    0.18    0.09
   3  -4  -3    0.58    0.09
  -3   4   3    0.69    0.12
  -3   4   3    0.63    0.12
   2  -4  -3    4.78    0.17
  -2   4   3    4.57    0.22
  -2   4   3    4.60    0.20
   1  -4  -3    7.01    0.15
   1  -4  -3    6.61    0.18
  -1   4   3    6.71    0.25
  -1   4   3    6.73    0.21
   0  -4  -3   14.25    0.30
   0  -4  -3   14.38    0.28
   0  -4  -3   14.57    0.25
   0   4   3   13.80    0.35
  -1  -4  -3   15.90    0.28
  -1  -4  -3   15.83    0.31
   1   4   3   15.84    0.33
   1   4   3   15.79    0.35
  -2  -4  -3    6.37    0.20
  -2  -4  -3    6.27    0.19
   2   4   3    6.32    0.21
   2   4   3    6.29    0.19
  -3  -4  -3    8.87    0.28
  -3  -4  -3    9.08    0.28
   3   4   3    9.62    0.29
  -4  -4  -3    0.81    0.12
  -4  -4  -3    0.94    0.13
   4   4   3    0.80    0.11
  -5  -4  -3    3.18    0.21
  -5  -4  -3    3.34    0.24
   5   4   3    2.64    0.19
   5  -5  -3    0.69    0.13
  -5   5   3    0.35    0.13
   4  -5  -3    6.01    0.26
  -4   5   3    6.05    0.32
   3  -5  -3   24.24    0.53
  -3   5   3   24.69    0.62
  -3   5   3   24.11    0.65
   2  -5  -3   23.91    0.48
  -2   5   3   23.03    0.60
  -2   5   3   23.60    0.55
   1  -5  -3    1.49    0.08
  -1   5   3    1.23    0.13
  -1   5   3    1.68    0.11
  -1   5   3    1.64    0.06
   0  -5  -3   98.81    1.45
   0  -5  -3   98.86    1.47
   0   5   3   97.55    1.46
   0   5   3  100.10    1.60
  -1  -5  -3    0.12    0.03
  -1  -5  -3    0.11    0.03
   1   5   3    0.14    0.05
   1   5   3    0.06    0.03
  -2  -5  -3    1.32    0.09
  -2  -5  -3    1.62    0.10
   2   5   3    1.45    0.10
   2   5   3    1.72    0.11
  -3  -5  -3   41.13    0.77
  -3  -5  -3   39.46    0.77
   3   5   3   40.46    0.79
  -4  -5  -3    3.47    0.21
  -4  -5  -3    3.09    0.19
   4   5   3    3.04    0.19
  -5  -5  -3    4.06    0.27
  -5  -5  -3    4.14    0.24
   5   5   3    3.80    0.23
  -6  -5  -3    2.53    0.27
   5  -6  -3    0.02    0.07
  -5   6   3    0.10    0.11
   4  -6  -3    6.23    0.27
  -4   6   3    5.75    0.34
  -4   6   3    6.98    0.38
   3  -6  -3   79.96    1.33
  -3   6   3   79.28    1.54
  -3   6   3   79.71    1.48
   2  -6  -3    0.93    0.09
  -2   6   3    0.95    0.13
  -2   6   3    0.76    0.13
   1  -6  -3    0.93    0.07
  -1   6   3    1.19    0.15
  -1   6   3    0.90    0.10
   0  -6  -3  101.69    1.52
   0  -6  -3  102.96    1.52
   0   6   3  100.82    1.67
   0   6   3  101.35    1.52
  -1  -6  -3    9.61    0.24
  -1  -6  -3    9.94    0.23
   1   6   3    9.60    0.30
   1   6   3    9.55    0.26
  -2  -6  -3    2.99    0.14
  -2  -6  -3    3.09    0.14
   2   6   3    3.22    0.15
   2   6   3    3.24    0.16
  -3  -6  -3    1.57    0.12
  -3  -6  -3    1.95    0.14
   3   6   3    2.07    0.14
  -4  -6  -3    0.86    0.13
  -4  -6  -3    0.63    0.12
   4   6   3    0.60    0.11
  -5  -6  -3    0.33    0.10
   5   6   3    0.42    0.11
   6   6   3    1.08    0.16
   4  -7  -3    0.01    0.05
  -4   7   3   -0.01    0.09
  -4   7   3   -0.01    0.07
   3  -7  -3   26.56    0.57
  -3   7   3   25.12    0.75
  -3   7   3   25.99    0.69
   2  -7  -3    3.46    0.15
  -2   7   3    3.27    0.20
  -2   7   3    3.30    0.24
   1  -7  -3    2.88    0.14
   1  -7  -3    2.76    0.12
  -1   7   3    2.93    0.21
   0  -7  -3    3.87    0.14
   0  -7  -3    3.66    0.14
   0   7   3    3.59    0.14
   0   7   3    3.74    0.21
  -1  -7  -3    0.36    0.06
  -1  -7  -3    0.26    0.05
   1   7   3    0.33    0.08
   1   7   3    0.25    0.06
  -2  -7  -3    3.58    0.16
  -2  -7  -3    3.37    0.16
   2   7   3    3.71    0.18
   2   7   3    3.80    0.18
  -3  -7  -3    5.74    0.24
  -3  -7  -3    5.90    0.23
   3   7   3    5.88    0.25
  -4  -7  -3    0.22    0.08
   4   7   3    0.31    0.09
  -5  -7  -3   12.12    0.43
   5   7   3   11.78    0.43
   6   7   3   18.21    0.66
   4  -8  -3    0.79    0.12
  -4   8   3    0.68    0.16
  -4   8   3    0.96    0.21
   3  -8  -3    0.71    0.10
  -3   8   3    0.56    0.15
  -3   8   3    0.77    0.16
   2  -8  -3    0.25    0.06
  -2   8   3    0.17    0.10
   1  -8  -3   19.91    0.42
   1  -8  -3   18.87    0.44
  -1   8   3   19.15    0.59
   0  -8  -3    2.70    0.13
   0  -8  -3    2.54    0.13
   0   8   3    2.68    0.20
   0   8   3    2.76    0.12
  -1  -8  -3    0.37    0.07
  -1  -8  -3    0.53    0.07
   1   8   3    0.55    0.08
   1   8   3    0.43    0.10
  -2  -8  -3    8.11    0.26
  -2  -8  -3    8.47    0.27
   2   8   3    8.57    0.29
   2   8   3    8.31    0.29
  -3  -8  -3    0.21    0.07
   3   8   3    0.19    0.07
  -4  -8  -3    0.97    0.14
   4   8   3    1.06    0.14
  -5  -8  -3    0.56    0.12
   5   8   3    0.72    0.13
   4  -9  -3    2.92    0.19
  -4   9   3    3.13    0.36
  -4   9   3    2.75    0.29
   3  -9  -3    0.70    0.11
  -3   9   3    0.41    0.14
   2  -9  -3    5.64    0.22
   2  -9  -3    6.33    0.26
  -2   9   3    5.95    0.36
   1  -9  -3   11.45    0.34
   1  -9  -3   11.58    0.31
  -1   9   3   11.68    0.47
   0  -9  -3    2.20    0.12
   0  -9  -3    2.19    0.13
   0   9   3    2.39    0.23
  -1  -9  -3    0.65    0.08
  -1  -9  -3    0.55    0.08
   1   9   3    0.65    0.12
   1   9   3    0.59    0.09
  -2  -9  -3   98.94    1.59
   2   9   3   97.44    1.63
  -3  -9  -3   20.70    0.51
   3   9   3   20.35    0.54
  -4  -9  -3    1.66    0.18
   4   9   3    1.51    0.18
  -5  -9  -3    6.59    0.32
   5   9   3    6.41    0.33
   4 -10  -3    5.61    0.27
  -4  10   3    6.12    0.48
   3 -10  -3    0.01    0.05
   3 -10  -3    0.04    0.08
  -3  10   3    0.05    0.11
   2 -10  -3    1.68    0.17
   2 -10  -3    1.45    0.13
  -2  10   3    1.77    0.25
   1 -10  -3    1.17    0.13
   1 -10  -3    1.28    0.12
  -1  10   3    1.14    0.20
   0 -10  -3    0.21    0.06
   0 -10  -3    0.22    0.07
   0  10   3    0.21    0.11
  -1 -10  -3    0.13    0.05
  -1 -10  -3    0.43    0.08
   1  10   3    0.28    0.10
   1  10   3    0.27    0.07
  -2 -10  -3    9.61    0.31
   2  10   3   10.77    0.35
  -3 -10  -3    0.17    0.07
   3  10   3    0.12    0.08
  -4 -10  -3    1.12    0.15
   4  10   3    1.30    0.18
  -5 -10  -3    0.62    0.13
   5  10   3    0.52    0.13
   3 -11  -3    0.05    0.06
   3 -11  -3    0.05    0.10
  -3  11   3    0.15    0.15
   2 -11  -3    0.99    0.12
   2 -11  -3    1.42    0.17
  -2  11   3    0.68    0.18
   1 -11  -3    0.07    0.06
   1 -11  -3    0.02    0.05
  -1  11   3    0.01    0.09
   0 -11  -3    0.10    0.05
   0 -11  -3   -0.01    0.05
   0  11   3   -0.02    0.08
  -1 -11  -3    1.45    0.13
   1  11   3    1.34    0.18
  -2 -11  -3    1.83    0.14
   2  11   3    1.78    0.18
  -3 -11  -3    0.49    0.10
   3  11   3    0.60    0.12
  -4 -11  -3   -0.04    0.06
   4  11   3    0.06    0.08
   3 -12  -3    1.51    0.20
   2 -12  -3    0.07    0.09
  -2  12   3    0.08    0.13
   1 -12  -3    0.32    0.08
   1 -12  -3    0.25    0.10
  -1  12   3    0.00    0.10
   0 -12  -3    0.58    0.09
   0  12   3    0.40    0.14
  -1 -12  -3    0.08    0.05
   1  12   3    0.09    0.09
  -2 -12  -3    0.03    0.06
   2  12   3    0.25    0.08
  -3 -12  -3    0.06    0.07
   3  12   3   -0.03    0.05
  -4 -12  -3    0.13    0.08
   4  12   3    0.04    0.07
  -1  13   3    0.03    0.12
   0  13   3   -0.05    0.10
   1  13   3    9.25    0.46
   3  13   3    0.49    0.11
   0  14   3    1.12    0.23
   3  14   3    0.84    0.15
   2  12  -4    0.03    0.07
   0  12  -4    0.56    0.19
   2  11  -4    2.79    0.21
  -2 -11   4    3.22    0.27
  -1 -11   4    0.77    0.16
   0  11  -4    0.33    0.15
   0 -11   4    0.33    0.13
  -1  11  -4    3.28    0.38
   1 -11   4    3.27    0.26
   3  10  -4    0.09    0.08
  -3 -10   4    0.10    0.10
   2  10  -4    1.98    0.19
  -2 -10   4    2.47    0.25
   1  10  -4    0.22    0.08
  -1 -10   4    0.18    0.10
   0  10  -4    0.21    0.13
   0 -10   4    0.20    0.10
  -1  10  -4   12.28    0.59
   1 -10   4   11.08    0.43
  -2  10  -4    0.06    0.13
   2 -10   4    0.25    0.12
   4   9  -4    0.12    0.08
  -4  -9   4   -0.16    0.08
   3   9  -4    2.99    0.21
  -3  -9   4    3.18    0.26
   2   9  -4    3.69    0.22
  -2  -9   4    3.54    0.25
   1   9  -4    2.38    0.26
   1   9  -4    2.32    0.17
  -1  -9   4    2.42    0.23
   0   9  -4   11.68    0.52
   0  -9   4   10.86    0.41
  -1   9  -4   14.07    0.61
   1  -9   4   13.70    0.46
  -2   9  -4    0.05    0.11
   2  -9   4   -0.02    0.07
  -3   9  -4    2.30    0.33
   3  -9   4    2.46    0.25
   4   8  -4   -0.03    0.06
  -4  -8   4   -0.14    0.08
   3   8  -4   19.65    0.55
  -3  -8   4   20.45    0.63
   2   8  -4   10.34    0.36
  -2  -8   4   10.99    0.41
   1   8  -4   21.30    0.51
   1   8  -4   19.04    0.62
  -1  -8   4   19.77    0.56
   0   8  -4   14.19    0.55
   0   8  -4   14.46    0.39
   0  -8   4   14.28    0.44
  -1   8  -4   32.86    0.93
   1  -8   4   32.85    0.75
  -2   8  -4    6.72    0.43
   2  -8   4    7.79    0.33
  -3   8  -4    0.99    0.23
   3  -8   4    0.96    0.16
   5   7  -4   14.56    0.51
   4   7  -4    2.02    0.20
  -4  -7   4    1.98    0.24
   3   7  -4    5.33    0.26
  -3  -7   4    5.00    0.30
   2   7  -4    1.97    0.15
  -2  -7   4    1.86    0.19
   1   7  -4    9.71    0.40
   1   7  -4    9.45    0.31
  -1  -7   4    9.64    0.35
   0   7  -4   33.84    0.67
   0   7  -4   34.16    0.87
   0  -7   4   34.25    0.74
  -1   7  -4    0.94    0.18
   1  -7   4    0.66    0.11
  -2   7  -4    1.60    0.24
   2  -7   4    1.47    0.16
  -3   7  -4    2.16    0.30
   3  -7   4    2.19    0.21
  -4   7  -4    0.40    0.18
   4  -7   4    0.66    0.14
   5   6  -4    4.42    0.26
  -5  -6   4    5.09    0.35
   4   6  -4    5.79    0.28
  -4  -6   4    5.79    0.33
   3   6  -4    0.75    0.12
  -3  -6   4    0.52    0.12
   2   6  -4   15.28    0.41
  -2  -6   4   14.73    0.45
   1   6  -4    0.16    0.08
   1   6  -4    0.18    0.06
  -1  -6   4    0.20    0.07
   0   6  -4    0.02    0.04
   0   6  -4    0.11    0.08
   0  -6   4    0.02    0.05
  -1   6  -4   12.89    0.50
  -1   6  -4   12.85    0.33
   1  -6   4   13.50    0.38
  -2   6  -4    0.12    0.10
   2  -6   4    0.07    0.07
  -3   6  -4    0.26    0.13
   3  -6   4    0.30    0.09
  -4   6  -4    1.25    0.24
   4  -6   4    0.88    0.16
   5   5  -4   -0.01    0.05
  -5  -5   4    0.00    0.10
   4   5  -4    8.28    0.32
  -4  -5   4    8.39    0.39
   3   5  -4    2.15    0.16
  -3  -5   4    2.50    0.20
   2   5  -4    1.17    0.12
  -2  -5   4    1.32    0.15
   1   5  -4    3.71    0.22
   1   5  -4    3.54    0.17
  -1  -5   4    3.43    0.18
   0   5  -4   34.36    0.65
   0   5  -4   34.77    0.82
   0  -5   4   34.93    0.69
  -1   5  -4    0.47    0.12
  -1   5  -4    0.39    0.07
   1  -5   4    0.41    0.08
  -2   5  -4    1.87    0.24
   2  -5   4    1.63    0.13
  -3   5  -4    8.28    0.43
   3  -5   4    7.79    0.31
  -4   5  -4    2.67    0.32
   4  -5   4    2.00    0.20
   5   4  -4   -0.03    0.06
   5   4  -4   -0.02    0.06
  -5  -4   4   -0.03    0.08
   4   4  -4    6.35    0.27
   4   4  -4    5.83    0.26
   3   4  -4   30.63    0.64
   3   4  -4   31.04    0.66
  -3  -4   4   30.71    0.74
   2   4  -4    2.28    0.12
   2   4  -4    2.41    0.14
  -2  -4   4    2.56    0.17
   1   4  -4   48.19    0.85
   1   4  -4   48.01    0.95
  -1  -4   4   48.48    0.89
   0   4  -4   59.89    1.00
   0   4  -4   62.69    1.18
   0  -4   4   61.39    1.04
  -1   4  -4    0.47    0.07
  -1   4  -4    0.58    0.12
   1  -4   4    0.52    0.08
  -2   4  -4    4.12    0.17
  -2   4  -4    4.29    0.28
   2  -4   4    4.43    0.19
  -3   4  -4    0.22    0.11
   3  -4   4    0.24    0.07
  -4   4  -4    0.85    0.18
  -5   4  -4   -0.01    0.09
   5   3  -4    4.34    0.26
   5   3  -4    4.33    0.23
  -5  -3   4    4.34    0.30
   4   3  -4   14.29    0.41
   4   3  -4   15.33    0.44
  -4  -3   4   14.74    0.51
   3   3  -4    6.31    0.24
   3   3  -4    6.58    0.24
  -3  -3   4    6.45    0.29
   2   3  -4    0.20    0.06
   2   3  -4    0.34    0.06
  -2  -3   4    0.33    0.06
  -2  -3   4    0.33    0.08
   1   3  -4   43.86    0.77
   1   3  -4   44.55    0.68
   1   3  -4   44.29    0.87
  -1  -3   4   44.59    0.81
   0   3  -4    0.02    0.03
   0   3  -4    0.04    0.05
   0  -3   4    0.11    0.04
  -1   3  -4    1.00    0.15
  -1   3  -4    1.08    0.09
   1  -3   4    0.82    0.08
   1  -3   4    1.00    0.05
  -2   3  -4    6.82    0.22
  -2   3  -4    6.92    0.33
   2  -3   4    6.80    0.23
   2  -3   4    6.77    0.19
  -3   3  -4    4.72    0.30
   3  -3   4    5.05    0.20
  -4   3  -4   -0.10    0.07
  -4   3  -4   -0.15    0.06
   4  -3   4    0.00    0.05
  -5   3  -4    4.64    0.33
   5   2  -4    7.18    0.32
  -5  -2   4    7.44    0.40
   4   2  -4   25.98    0.58
   4   2  -4   25.70    0.61
  -4  -2   4   25.93    0.70
   3   2  -4    1.83    0.12
   3   2  -4    1.58    0.12
  -3  -2   4    1.51    0.16
   2   2  -4    0.75    0.08
   2   2  -4    0.85    0.09
  -2  -2   4    0.85    0.09
  -2  -2   4    0.85    0.11
   1   2  -4    0.25    0.03
   1   2  -4    0.22    0.05
  -1  -2   4    0.34    0.06
  -1  -2   4    0.29    0.06
   0   2  -4   21.64    0.53
   0   2  -4   21.79    0.42
   0  -2   4   21.48    0.43
  -1   2  -4    3.43    0.20
  -1   2  -4    3.32    0.14
   1  -2   4    3.82    0.14
   1  -2   4    3.51    0.10
  -2   2  -4    0.04    0.04
  -2   2  -4    0.01    0.06
   2  -2   4    0.03    0.03
   2  -2   4    0.00    0.03
  -3   2  -4    2.18    0.14
  -3   2  -4    2.33    0.18
  -3   2  -4    2.06    0.22
   3  -2   4    2.04    0.13
  -4   2  -4    0.03    0.08
  -4   2  -4    0.12    0.08
   4  -2   4   -0.02    0.05
  -5   2  -4    3.24    0.26
   5  -2   4    3.78    0.24
   5   1  -4    1.42    0.17
  -5  -1   4    1.72    0.22
   4   1  -4    0.83    0.12
   4   1  -4    0.91    0.11
  -4  -1   4    0.99    0.16
   3   1  -4    0.05    0.04
   3   1  -4   -0.02    0.03
  -3  -1   4    0.00    0.05
   2   1  -4    7.10    0.21
   2   1  -4    7.11    0.21
  -2  -1   4    7.50    0.22
  -2  -1   4    7.45    0.26
   1   1  -4   50.84    0.84
   1   1  -4   51.27    0.78
  -1  -1   4   51.60    0.87
  -1  -1   4   51.18    0.88
   0   1  -4    3.88    0.07
   0   1  -4    3.92    0.14
   0   1  -4    4.34    0.21
   0  -1   4    3.82    0.13
  -1   1  -4   26.54    0.62
  -1   1  -4   27.59    0.44
  -1   1  -4   26.81    0.51
   1  -1   4   28.13    0.49
  -2   1  -4   70.71    1.19
  -2   1  -4   68.18    1.14
  -2   1  -4   70.49    1.28
  -2   1  -4   67.93    1.08
  -3   1  -4    0.05    0.05
  -3   1  -4    0.05    0.06
  -3   1  -4   -0.07    0.05
  -4   1  -4    0.12    0.08
   4  -1   4    0.08    0.07
  -5   1  -4    3.53    0.27
   5  -1   4    3.39    0.23
  -6   1  -4    2.02    0.40
   5   0  -4    0.65    0.13
  -5   0   4    0.60    0.14
   4   0  -4    3.07    0.19
  -4   0   4    3.16    0.23
   3   0  -4    1.81    0.13
   3   0  -4    1.63    0.11
  -3   0   4    1.63    0.17
   2   0  -4    0.04    0.03
   2   0  -4   -0.01    0.03
  -2   0   4   -0.03    0.04
  -2   0   4    0.05    0.04
   1   0  -4    0.59    0.05
   1   0  -4    0.59    0.06
  -1   0   4    0.41    0.06
  -1   0   4    0.48    0.07
   0   0  -4    2.81    0.07
   0   0  -4    2.62    0.11
   0   0   4    2.63    0.10
   0   0   4    2.94    0.15
  -1   0  -4   19.66    0.40
  -1   0  -4   19.41    0.49
  -1   0  -4   19.91    0.34
   1   0   4   19.95    0.36
  -2   0  -4   23.68    0.58
  -2   0  -4   23.24    0.44
  -2   0  -4   23.23    0.49
  -2   0  -4   23.80    0.50
  -3   0  -4    2.54    0.20
  -3   0  -4    2.93    0.17
  -3   0  -4    2.63    0.14
  -3   0  -4    2.57    0.17
  -4   0  -4    2.20    0.21
   4   0   4    2.07    0.24
  -5   0  -4    0.04    0.08
   5   0   4    0.01    0.06
  -6   0  -4    0.90    0.19
   6   0   4    0.84    0.16
   5  -1  -4    6.17    0.29
  -5   1   4    6.29    0.36
   4  -1  -4    5.49    0.25
  -4   1   4    5.13    0.29
   3  -1  -4   18.60    0.39
   3  -1  -4   18.11    0.44
  -3   1   4   18.78    0.51
   2  -1  -4    0.59    0.07
   2  -1  -4    0.55    0.06
  -2   1   4    0.68    0.09
  -2   1   4    0.81    0.10
   1  -1  -4    0.36    0.05
   1  -1  -4    0.48    0.05
  -1   1   4    0.45    0.06
  -1   1   4    0.40    0.06
   0  -1  -4    8.98    0.22
   0  -1  -4    9.18    0.17
   0   1   4    8.98    0.26
   0   1   4    9.20    0.19
  -1  -1  -4    6.35    0.15
  -1  -1  -4    6.12    0.20
   1   1   4    6.77    0.14
   1   1   4    6.54    0.23
  -2  -1  -4   36.85    0.65
  -2  -1  -4   36.02    0.75
  -2  -1  -4   35.10    0.62
  -2  -1  -4   36.20    0.69
  -3  -1  -4   24.28    0.60
  -3  -1  -4   23.67    0.50
  -3  -1  -4   23.65    0.54
  -4  -1  -4    1.05    0.12
  -4  -1  -4    1.08    0.14
   4   1   4    1.25    0.13
  -5  -1  -4    2.14    0.23
   5   1   4    1.29    0.18
  -6  -1  -4    0.32    0.14
   6   1   4    0.11    0.09
   5  -2  -4    0.71    0.13
  -5   2   4    0.44    0.14
   4  -2  -4    1.40    0.15
  -4   2   4    2.64    0.25
   3  -2  -4    0.04    0.04
  -3   2   4    0.01    0.04
  -3   2   4    0.04    0.06
   2  -2  -4   30.40    0.57
   2  -2  -4   30.79    0.52
  -2   2   4   30.56    0.62
  -2   2   4   30.50    0.62
   1  -2  -4   46.05    0.72
   1  -2  -4   45.35    0.72
  -1   2   4   45.04    0.76
  -1   2   4   45.81    0.81
   0  -2  -4   17.11    0.34
   0  -2  -4   17.21    0.30
   0   2   4   17.22    0.39
   0   2   4   17.44    0.29
  -1  -2  -4    5.14    0.14
  -1  -2  -4    5.11    0.18
   1   2   4    5.30    0.11
   1   2   4    5.46    0.19
  -2  -2  -4  101.46    1.57
  -2  -2  -4  103.32    1.65
  -2  -2  -4  103.54    1.56
   2   2   4  105.27    1.63
  -3  -2  -4    1.74    0.12
  -3  -2  -4    1.94    0.13
   3   2   4    2.27    0.15
   3   2   4    2.25    0.13
  -4  -2  -4    1.85    0.14
  -4  -2  -4    2.04    0.17
   4   2   4    2.04    0.14
  -5  -2  -4    1.89    0.21
  -5  -2  -4    1.40    0.16
   6   2   4    0.23    0.11
   5  -3  -4    0.01    0.06
  -5   3   4    0.29    0.12
   4  -3  -4    4.32    0.22
  -4   3   4    4.09    0.26
   3  -3  -4    0.06    0.04
  -3   3   4    0.06    0.06
  -3   3   4    0.12    0.06
   2  -3  -4   21.88    0.45
   2  -3  -4   22.15    0.38
  -2   3   4   21.41    0.52
  -2   3   4   22.00    0.50
   1  -3  -4    3.19    0.11
   1  -3  -4    3.05    0.11
  -1   3   4    3.07    0.16
  -1   3   4    3.24    0.13
   0  -3  -4   37.72    0.64
   0  -3  -4   37.18    0.60
   0   3   4   38.52    0.57
   0   3   4   38.03    0.70
  -1  -3  -4    3.96    0.17
  -1  -3  -4    4.15    0.13
   1   3   4    3.98    0.17
  -2  -3  -4   11.77    0.26
  -2  -3  -4   12.06    0.35
  -2  -3  -4   11.65    0.29
   2   3   4   12.42    0.32
  -3  -3  -4    4.33    0.19
  -3  -3  -4    3.99    0.18
   3   3   4    4.08    0.19
   3   3   4    4.32    0.18
  -4  -3  -4    6.39    0.28
  -4  -3  -4    6.78    0.27
   4   3   4    7.08    0.27
  -5  -3  -4    0.71    0.14
  -5  -3  -4    0.71    0.13
   5   3   4    0.77    0.12
   6   3   4   -0.01    0.08
   5  -4  -4    3.48    0.23
  -5   4   4    2.80    0.29
   4  -4  -4    0.06    0.05
  -4   4   4    0.01    0.07
   3  -4  -4    1.15    0.12
  -3   4   4    1.29    0.16
  -3   4   4    1.10    0.15
   2  -4  -4    7.27    0.22
  -2   4   4    7.69    0.26
  -2   4   4    7.35    0.29
   1  -4  -4   20.82    0.37
   1  -4  -4   20.64    0.39
  -1   4   4   20.79    0.49
  -1   4   4   21.15    0.42
   0  -4  -4   20.67    0.41
   0  -4  -4   20.67    0.38
   0   4   4   21.29    0.47
   0   4   4   21.02    0.36
  -1  -4  -4   41.50    0.76
  -1  -4  -4   41.46    0.69
   1   4   4   41.78    0.75
  -2  -4  -4    1.06    0.07
  -2  -4  -4    1.13    0.09
   2   4   4    1.18    0.09
   2   4   4    1.30    0.10
  -3  -4  -4    0.09    0.05
  -3  -4  -4   -0.03    0.03
   3   4   4    0.10    0.05
  -4  -4  -4    6.13    0.27
  -4  -4  -4    6.23    0.26
   4   4   4    6.16    0.26
  -5  -4  -4    0.09    0.07
   5   4   4    0.02    0.06
  -6  -4  -4    0.30    0.12
   5  -5  -4    3.48    0.23
  -5   5   4    3.61    0.29
   4  -5  -4    1.31    0.14
  -4   5   4    1.72    0.21
   3  -5  -4    0.09    0.05
  -3   5   4    0.05    0.07
  -3   5   4    0.11    0.07
   2  -5  -4    0.93    0.09
  -2   5   4    0.87    0.11
  -2   5   4    0.98    0.14
   1  -5  -4    4.85    0.16
   1  -5  -4    4.81    0.14
  -1   5   4    4.29    0.22
  -1   5   4    4.66    0.18
   0  -5  -4    0.35    0.06
   0  -5  -4    0.26    0.03
   0  -5  -4    0.21    0.04
   0   5   4    0.34    0.08
  -1  -5  -4   11.80    0.22
  -1  -5  -4   11.69    0.27
   1   5   4   11.38    0.29
   1   5   4   11.58    0.32
  -2  -5  -4    0.98    0.10
  -2  -5  -4    1.12    0.08
   2   5   4    1.15    0.11
   2   5   4    1.10    0.10
  -3  -5  -4   12.40    0.34
  -3  -5  -4   12.26    0.33
   3   5   4   12.07    0.36
  -4  -5  -4   22.71    0.56
   4   5   4   23.86    0.58
  -5  -5  -4    2.27    0.21
   5   5   4    1.95    0.19
   6   5   4    4.24    0.46
   5  -6  -4    0.41    0.10
  -5   6   4    0.70    0.18
   4  -6  -4    2.64    0.18
  -4   6   4    2.26    0.24
   3  -6  -4    0.10    0.05
  -3   6   4    0.05    0.07
  -3   6   4    0.13    0.08
   2  -6  -4   10.04    0.27
  -2   6   4    9.15    0.37
  -2   6   4    8.74    0.32
   1  -6  -4    7.56    0.21
  -1   6   4    7.56    0.25
  -1   6   4    7.26    0.30
   0  -6  -4    3.83    0.12
   0  -6  -4    3.84    0.14
   0   6   4    3.75    0.20
   0   6   4    3.69    0.13
  -1  -6  -4   14.85    0.29
  -1  -6  -4   14.41    0.33
   1   6   4   15.84    0.36
   1   6   4   14.82    0.39
  -2  -6  -4    6.08    0.21
  -2  -6  -4    6.31    0.19
   2   6   4    5.96    0.22
   2   6   4    6.48    0.23
  -3  -6  -4   28.93    0.61
   3   6   4   30.48    0.65
  -4  -6  -4    5.83    0.26
   4   6   4    6.04    0.27
  -5  -6  -4    0.74    0.13
   5   6   4    0.86    0.14
   6   6   4    0.58    0.13
   4  -7  -4    0.73    0.12
  -4   7   4    0.59    0.15
  -4   7   4    0.92    0.17
   3  -7  -4   18.29    0.46
  -3   7   4   18.95    0.57
  -3   7   4   17.36    0.60
   2  -7  -4   18.12    0.41
  -2   7   4   17.90    0.57
  -2   7   4   18.38    0.50
   1  -7  -4   10.91    0.27
  -1   7   4   10.47    0.39
   0  -7  -4    0.50    0.06
   0  -7  -4    0.44    0.06
   0   7   4    0.44    0.10
   0   7   4    0.39    0.06
  -1  -7  -4    0.02    0.03
  -1  -7  -4    0.02    0.03
   1   7   4    0.03    0.05
   1   7   4    0.02    0.03
  -2  -7  -4    0.12    0.05
   2   7   4    0.11    0.06
   2   7   4    0.15    0.06
  -3  -7  -4   13.99    0.38
   3   7   4   13.66    0.41
  -4  -7  -4    1.79    0.17
   4   7   4    2.12    0.17
  -5  -7  -4    1.68    0.19
   5   7   4    1.56    0.19
   6   7   4    0.01    0.13
   4  -8  -4    1.24    0.15
  -4   8   4    0.87    0.19
  -4   8   4    0.82    0.17
   3  -8  -4   20.54    0.49
  -3   8   4   19.56    0.68
  -3   8   4   19.98    0.61
   2  -8  -4    1.45    0.11
  -2   8   4    1.98    0.24
  -2   8   4    1.74    0.19
   1  -8  -4    3.72    0.16
   1  -8  -4    3.87    0.17
  -1   8   4    3.08    0.23
   0  -8  -4   17.10    0.38
   0  -8  -4   16.51    0.36
   0   8   4   16.61    0.37
   0   8   4   17.25    0.51
  -1  -8  -4    4.40    0.17
  -1  -8  -4    4.65    0.18
   1   8   4    4.72    0.24
   1   8   4    4.57    0.19
  -2  -8  -4    8.57    0.27
   2   8   4    8.68    0.30
   2   8   4    8.78    0.30
  -3  -8  -4    3.84    0.20
   3   8   4    4.05    0.22
  -4  -8  -4    8.76    0.33
   4   8   4    9.44    0.36
  -5  -8  -4    1.38    0.18
   5   8   4    0.95    0.15
   4  -9  -4    3.15    0.20
  -4   9   4    2.59    0.28
  -4   9   4    3.11    0.35
   3  -9  -4    0.03    0.04
  -3   9   4    0.17    0.12
  -3   9   4    0.13    0.10
   2  -9  -4    1.26    0.14
   2  -9  -4    0.75    0.09
  -2   9   4    1.27    0.21
   1  -9  -4    2.90    0.16
   1  -9  -4    2.94    0.15
  -1   9   4    3.41    0.26
   0  -9  -4   15.75    0.38
   0  -9  -4   16.71    0.38
   0   9   4   16.90    0.54
  -1  -9  -4    1.29    0.11
   1   9   4    1.44    0.17
   1   9   4    1.20    0.12
  -2  -9  -4    4.76    0.20
   2   9   4    4.79    0.22
   2   9   4    4.33    0.23
  -3  -9  -4   44.81    0.88
   3   9   4   45.27    0.93
  -4  -9  -4   23.97    0.61
   4   9   4   24.16    0.65
  -5  -9  -4    2.02    0.21
   5   9   4    1.92    0.21
  -4  10   4    1.40    0.28
   3 -10  -4    0.30    0.10
   3 -10  -4    0.16    0.07
  -3  10   4    0.37    0.15
   2 -10  -4    0.15    0.08
   2 -10  -4    0.07    0.05
  -2  10   4    0.00    0.09
   1 -10  -4    7.31    0.25
   1 -10  -4    7.51    0.27
  -1  10   4    7.95    0.41
   0 -10  -4   13.39    0.35
   0  10   4   13.17    0.50
  -1 -10  -4    2.20    0.14
   1  10   4    1.96    0.14
   1  10   4    1.91    0.21
  -2 -10  -4   12.06    0.36
   2  10   4   12.78    0.39
  -3 -10  -4   31.87    0.71
   3  10   4   33.36    0.76
  -4 -10  -4    5.07    0.27
   4  10   4    5.80    0.30
  -5 -10  -4    1.64    0.19
   5  10   4    1.63    0.20
   3 -11  -4    2.70    0.22
   3 -11  -4    3.23    0.19
  -3  11   4    2.76    0.33
   2 -11  -4    1.28    0.14
   2 -11  -4    1.32    0.15
  -2  11   4    1.16    0.22
   1 -11  -4   12.43    0.35
  -1  11   4   11.84    0.53
   0 -11  -4    9.45    0.30
   0  11   4    9.58    0.44
  -1 -11  -4    2.38    0.15
   1  11   4    2.15    0.23
  -2 -11  -4    7.34    0.28
   2  11   4    7.32    0.30
  -3 -11  -4    0.36    0.09
   3  11   4    0.44    0.11
  -4 -11  -4    1.01    0.14
   4  11   4    1.05    0.16
   3 -12  -4    1.07    0.14
   2 -12  -4    0.78    0.12
  -2  12   4    0.57    0.18
   1 -12  -4    3.42    0.18
  -1  12   4    3.56    0.36
   0 -12  -4    0.22    0.07
   0  12   4    0.25    0.13
  -1 -12  -4    0.08    0.05
   1  12   4    0.13    0.10
  -2 -12  -4    1.44    0.16
   2  12   4    1.38    0.16
  -3 -12  -4    1.22    0.16
   3  12   4    1.30    0.17
  -4 -12  -4    0.50    0.12
   4  12   4    0.68    0.14
   1 -13  -4   -0.06    0.05
  -1  13   4    0.03    0.11
   0 -13  -4    2.54    0.17
   0  13   4    2.92    0.32
  -1 -13  -4    1.39    0.15
   1  13   4    1.09    0.20
  -2 -13  -4    4.85    0.25
  -3 -13  -4    0.25    0.09
   3  13   4    0.12    0.08
  -4 -13  -4    1.02    0.16
   0  14   4   -0.12    0.09
   3  14   4    1.64    0.20
   2  11  -5    0.12    0.09
  -1 -11   5    1.32    0.20
   0  11  -5   -0.04    0.11
   0 -11   5    0.03    0.08
   3  10  -5    0.51    0.13
  -3 -10   5    0.32    0.13
   2  10  -5    5.48    0.28
  -2 -10   5    4.97    0.33
   1  10  -5    0.49    0.10
  -1 -10   5    0.37    0.12
   0  10  -5    0.65    0.19
   0 -10   5    0.46    0.12
  -1  10  -5    3.15    0.37
   1 -10   5    3.76    0.27
   3   9  -5    1.29    0.17
  -3  -9   5    1.60    0.23
   2   9  -5    1.19    0.16
  -2  -9   5    0.78    0.15
   1   9  -5    0.12    0.07
  -1  -9   5    0.08    0.08
   0   9  -5    2.14    0.28
   0  -9   5    1.81    0.20
  -1   9  -5    1.31    0.25
   1  -9   5    0.92    0.15
  -2   9  -5   -0.02    0.12
   2  -9   5   -0.05    0.08
   4   8  -5   -0.04    0.07
  -4  -8   5   -0.09    0.08
   3   8  -5    3.90    0.24
  -3  -8   5    4.03    0.28
   2   8  -5    0.72    0.12
  -2  -8   5    0.78    0.15
   1   8  -5    2.57    0.18
   1   8  -5    2.85    0.28
  -1  -8   5    2.19    0.21
   0   8  -5    1.38    0.21
   0   8  -5    2.01    0.15
   0  -8   5    1.99    0.19
  -1   8  -5   87.35    1.82
   1  -8   5   83.76    1.54
  -2   8  -5    6.13    0.43
   2  -8   5    6.71    0.32
  -3   8  -5    1.12    0.25
   3  -8   5    1.07    0.16
   4   7  -5    1.68    0.19
  -4  -7   5    2.08    0.25
   3   7  -5    0.66    0.12
  -3  -7   5    0.98    0.17
   2   7  -5    4.16    0.22
  -2  -7   5    4.29    0.26
   1   7  -5    2.89    0.18
   1   7  -5    3.06    0.24
  -1  -7   5    3.16    0.21
   0   7  -5    0.29    0.12
   0   7  -5    0.31    0.08
   0  -7   5    0.40    0.10
  -1   7  -5    1.57    0.24
   1  -7   5    1.49    0.16
  -2   7  -5    6.30    0.41
   2  -7   5    6.69    0.30
  -3   7  -5    2.42    0.32
   3  -7   5    2.73    0.22
  -4   7  -5    0.35    0.17
   5   6  -5    6.60    0.32
   4   6  -5    0.32    0.10
  -4  -6   5    0.38    0.13
   3   6  -5   60.99    1.16
  -3  -6   5   61.24    1.26
   2   6  -5   97.04    1.64
  -2  -6   5   98.48    1.72
   1   6  -5    0.27    0.07
   1   6  -5    0.32    0.11
  -1  -6   5    0.22    0.09
   0   6  -5    0.67    0.09
   0   6  -5    0.62    0.15
   0  -6   5    0.66    0.10
  -1   6  -5    4.32    0.19
  -1   6  -5    3.89    0.30
   1  -6   5    3.91    0.21
  -2   6  -5    7.26    0.43
   2  -6   5    8.22    0.32
  -3   6  -5    0.25    0.14
   3  -6   5    0.53    0.12
  -4   6  -5    0.71    0.20
   4  -6   5    0.89    0.15
   5   5  -5    0.96    0.14
  -5  -5   5    0.89    0.18
   4   5  -5    0.03    0.06
  -4  -5   5    0.17    0.10
   3   5  -5    3.97    0.21
  -3  -5   5    3.50    0.24
   2   5  -5    7.38    0.27
  -2  -5   5    7.67    0.32
   1   5  -5    1.88    0.21
   1   5  -5    1.49    0.12
  -1  -5   5    1.23    0.13
   0   5  -5    1.78    0.12
   0   5  -5    1.74    0.20
   0  -5   5    1.58    0.15
  -1   5  -5    1.42    0.21
  -1   5  -5    1.32    0.11
   1  -5   5    1.26    0.13
  -2   5  -5   -0.10    0.07
   2  -5   5   -0.01    0.05
  -3   5  -5    8.43    0.46
   3  -5   5    8.71    0.33
  -4   5  -5    0.51    0.17
   4  -5   5    0.77    0.14
   5   4  -5    1.27    0.16
  -5  -4   5    1.63    0.23
   4   4  -5    8.16    0.32
  -4  -4   5    8.38    0.39
   3   4  -5    4.78    0.22
  -3  -4   5    4.84    0.27
   2   4  -5    0.16    0.06
  -2  -4   5    0.16    0.08
   1   4  -5    5.89    0.22
   1   4  -5    6.03    0.29
   0   4  -5   40.27    0.74
   0   4  -5   40.02    0.91
   0  -4   5   39.72    0.76
  -1   4  -5    0.53    0.08
  -1   4  -5    0.30    0.11
   1  -4   5    0.52    0.08
  -2   4  -5   -0.06    0.07
  -2   4  -5   -0.01    0.04
   2  -4   5   -0.03    0.04
  -3   4  -5   18.18    0.65
   3  -4   5   17.58    0.49
  -4   4  -5    0.49    0.16
   4  -4   5    0.58    0.12
   5  -4   5    0.44    0.13
   5   3  -5    1.18    0.16
  -5  -3   5    1.19    0.20
   4   3  -5    0.33    0.09
   4   3  -5    0.21    0.07
  -4  -3   5    0.30    0.11
   3   3  -5   60.27    1.05
   3   3  -5   60.95    1.09
  -3  -3   5   61.22    1.19
   2   3  -5    7.91    0.26
   2   3  -5    7.14    0.21
  -2  -3   5    7.46    0.26
  -2  -3   5    7.50    0.29
   1   3  -5    2.96    0.20
   1   3  -5    2.77    0.14
  -1  -3   5    3.08    0.16
   0   3  -5   29.02    0.71
   0   3  -5   28.84    0.57
   0  -3   5   29.18    0.58
  -1   3  -5    5.16    0.28
  -1   3  -5    4.78    0.19
   1  -3   5    4.62    0.18
  -2   3  -5   -0.02    0.03
  -2   3  -5   -0.05    0.07
   2  -3   5    0.05    0.04
  -3   3  -5    8.35    0.41
   3  -3   5    8.77    0.30
  -4   3  -5   -0.04    0.09
   5   2  -5    0.21    0.09
  -5  -2   5    0.41    0.13
   4   2  -5   16.68    0.44
   4   2  -5   15.85    0.45
  -4  -2   5   16.17    0.55
   3   2  -5  138.73    2.16
   3   2  -5  140.02    2.18
  -3  -2   5  142.58    2.31
   2   2  -5    0.17    0.05
   2   2  -5    0.23    0.05
  -2  -2   5    0.29    0.07
  -2  -2   5    0.15    0.07
   1   2  -5    2.03    0.07
   1   2  -5    2.06    0.12
  -1  -2   5    1.77    0.12
  -1  -2   5    1.81    0.14
   0   2  -5    0.41    0.06
   0   2  -5    0.31    0.09
   0  -2   5    0.45    0.07
  -1   2  -5    8.58    0.25
  -1   2  -5    8.44    0.35
   1  -2   5    8.17    0.17
   1  -2   5    8.48    0.24
  -2   2  -5   14.81    0.50
  -2   2  -5   14.67    0.38
   2  -2   5   15.58    0.37
   2  -2   5   15.43    0.33
  -3   2  -5    9.85    0.33
  -3   2  -5   10.38    0.44
   3  -2   5   10.61    0.31
   3  -2   5   10.06    0.32
  -4   2  -5    0.07    0.09
  -4   2  -5   -0.05    0.07
   4  -2   5    0.05    0.07
  -5   2  -5    3.78    0.30
   5   1  -5    0.12    0.08
  -5  -1   5    0.24    0.12
   4   1  -5    6.29    0.25
   4   1  -5    6.14    0.27
  -4  -1   5    6.80    0.34
   3   1  -5    1.69    0.12
   3   1  -5    1.52    0.12
  -3  -1   5    1.88    0.19
   2   1  -5   41.55    0.74
   2   1  -5   40.38    0.70
  -2  -1   5   40.40    0.76
  -2  -1   5   42.04    0.81
   1   1  -5   28.23    0.45
   1   1  -5   27.79    0.53
  -1  -1   5   27.71    0.59
  -1  -1   5   28.63    0.56
   0   1  -5   21.51    0.32
   0   1  -5   19.86    0.42
   0  -1   5   21.01    0.42
  -1   1  -5    6.55    0.30
  -1   1  -5    6.37    0.21
  -1   1  -5    6.57    0.14
   1  -1   5    6.50    0.19
  -2   1  -5   -0.02    0.03
  -2   1  -5   -0.07    0.06
  -2   1  -5    0.01    0.03
   2  -1   5    0.06    0.04
  -3   1  -5   -0.02    0.05
  -3   1  -5    0.04    0.05
  -3   1  -5    0.11    0.08
  -4   1  -5    2.14    0.25
  -4   1  -5    2.01    0.21
   4  -1   5    2.38    0.17
  -5   1  -5    9.36    0.43
   5  -1   5    9.42    0.38
   5   0  -5    0.23    0.09
  -5   0   5    0.34    0.12
   4   0  -5    0.63    0.10
  -4   0   5    0.68    0.14
   3   0  -5    1.36    0.10
   3   0  -5    1.47    0.11
  -3   0   5    1.31    0.15
   2   0  -5   63.98    1.03
   2   0  -5   61.54    1.01
  -2   0   5   62.10    1.07
  -2   0   5   62.92    1.11
   1   0  -5    0.86    0.05
   1   0  -5    0.72    0.08
  -1   0   5    0.68    0.08
  -1   0   5    0.74    0.10
   0   0  -5    0.18    0.04
   0   0  -5    0.14    0.02
   0   0   5    0.18    0.06
   0   0   5    0.15    0.04
  -1   0  -5    1.11    0.14
  -1   0  -5    1.36    0.06
  -1   0  -5    1.21    0.10
   1   0   5    1.19    0.07
  -2   0  -5  329.71    4.94
  -2   0  -5  323.90    4.77
  -2   0  -5  332.56    4.85
   2   0   5  332.48    4.68
  -3   0  -5    1.73    0.12
  -3   0  -5    2.36    0.20
  -3   0  -5    2.04    0.15
  -3   0  -5    1.71    0.14
  -4   0  -5    6.55    0.31
  -4   0  -5    6.91    0.26
   4   0   5    6.79    0.28
  -5   0  -5    8.46    0.40
   5   0   5    8.87    0.37
   6   0   5    0.80    0.25
   5  -1  -5    3.93    0.24
  -5   1   5    3.75    0.29
   4  -1  -5    3.37    0.20
  -4   1   5    3.79    0.25
   3  -1  -5    8.07    0.26
   3  -1  -5    7.53    0.23
  -3   1   5    7.47    0.31
   2  -1  -5    0.23    0.05
   2  -1  -5    0.18    0.04
  -2   1   5    0.22    0.06
  -2   1   5    0.31    0.07
   1  -1  -5   75.86    1.17
   1  -1  -5   74.80    1.12
  -1   1   5   74.31    1.25
  -1   1   5   73.63    1.19
   0  -1  -5   25.08    0.48
   0  -1  -5   25.17    0.40
   0   1   5   24.20    0.53
   0   1   5   24.52    0.43
  -1  -1  -5   16.08    0.30
  -1  -1  -5   16.22    0.37
   1   1   5   16.59    0.43
   1   1   5   16.01    0.30
  -2  -1  -5  252.75    3.68
  -2  -1  -5  249.52    3.64
  -2  -1  -5  253.94    3.74
   2   1   5  259.64    3.80
  -3  -1  -5    3.89    0.25
  -3  -1  -5    4.07    0.21
  -3  -1  -5    3.76    0.19
  -3  -1  -5    3.87    0.17
  -4  -1  -5    0.38    0.08
  -4  -1  -5    0.58    0.11
   4   1   5    0.30    0.07
  -5  -1  -5    0.17    0.10
   6   1   5    1.02    0.19
   5  -2  -5    0.07    0.07
  -5   2   5    0.21    0.12
   4  -2  -5   49.69    0.97
  -4   2   5   51.39    1.10
   3  -2  -5    1.94    0.13
  -3   2   5    1.50    0.15
  -3   2   5    2.05    0.19
   2  -2  -5    0.32    0.05
   2  -2  -5    0.41    0.06
  -2   2   5    0.42    0.08
  -2   2   5    0.44    0.08
   1  -2  -5  120.77    1.78
   1  -2  -5  117.53    1.75
  -1   2   5  119.74    1.88
  -1   2   5  120.06    1.80
   0  -2  -5   22.64    0.44
   0  -2  -5   21.70    0.38
   0   2   5   23.13    0.38
   0   2   5   21.77    0.49
  -1  -2  -5   30.40    0.52
  -1  -2  -5   31.33    0.60
   1   2   5   31.96    0.48
   1   2   5   30.82    0.63
  -2  -2  -5   20.08    0.40
  -2  -2  -5   19.15    0.47
  -2  -2  -5   19.69    0.40
   2   2   5   19.70    0.48
  -3  -2  -5    0.12    0.05
  -3  -2  -5    0.06    0.05
  -3  -2  -5    0.13    0.07
   3   2   5    0.10    0.06
  -4  -2  -5    0.95    0.13
  -4  -2  -5    1.09    0.13
   4   2   5    1.03    0.12
  -5  -2  -5    0.54    0.11
   6   2   5    7.86    0.45
   5  -3  -5    0.88    0.14
  -5   3   5    0.94    0.17
   4  -3  -5   -0.02    0.05
  -4   3   5   -0.02    0.07
   3  -3  -5    0.59    0.09
  -3   3   5    0.64    0.11
  -3   3   5    0.51    0.10
   2  -3  -5   12.78    0.31
   2  -3  -5   13.15    0.28
  -2   3   5   12.73    0.38
  -2   3   5   12.83    0.36
   1  -3  -5    1.65    0.09
   1  -3  -5    1.47    0.08
  -1   3   5    1.42    0.12
  -1   3   5    1.41    0.09
   0  -3  -5    0.06    0.03
   0  -3  -5    0.09    0.04
   0   3   5    0.11    0.03
   0   3   5    0.16    0.06
  -1  -3  -5   82.70    1.33
  -1  -3  -5   81.04    1.24
   1   3   5   81.68    1.35
  -2  -3  -5    8.64    0.30
  -2  -3  -5    8.77    0.22
  -2  -3  -5    9.22    0.25
   2   3   5    9.08    0.29
  -3  -3  -5    6.97    0.24
  -3  -3  -5    6.75    0.23
   3   3   5    6.49    0.25
   3   3   5    7.02    0.26
  -4  -3  -5    0.89    0.14
  -4  -3  -5    0.97    0.12
   4   3   5    0.92    0.12
  -5  -3  -5    0.86    0.14
   5   3   5    1.01    0.14
   5  -4  -5    2.30    0.22
  -5   4   5    2.30    0.27
   4  -4  -5    3.75    0.21
  -4   4   5    4.07    0.27
   3  -4  -5    1.26    0.12
  -3   4   5    1.40    0.17
  -3   4   5    1.27    0.16
   2  -4  -5    6.92    0.22
  -2   4   5    7.15    0.26
  -2   4   5    6.74    0.29
   1  -4  -5   30.95    0.54
   1  -4  -5   31.38    0.55
  -1   4   5   30.51    0.56
  -1   4   5   30.70    0.67
   0  -4  -5    0.59    0.07
   0  -4  -5    0.92    0.06
   0   4   5    0.79    0.05
   0   4   5    0.64    0.10
  -1  -4  -5   24.34    0.45
   1   4   5   24.00    0.53
  -2  -4  -5   -0.03    0.05
  -2  -4  -5   -0.01    0.02
  -2  -4  -5    0.01    0.03
   2   4   5   -0.04    0.03
  -3  -4  -5    8.83    0.29
  -3  -4  -5    9.02    0.28
   3   4   5    8.38    0.28
   3   4   5    9.16    0.30
  -4  -4  -5    3.08    0.18
   4   4   5    2.58    0.17
  -5  -4  -5    0.44    0.10
   5   4   5    0.15    0.07
   5  -5  -5    0.61    0.12
  -5   5   5    0.43    0.15
   4  -5  -5    0.03    0.06
  -4   5   5   -0.02    0.06
   3  -5  -5    8.70    0.28
  -3   5   5    8.33    0.34
  -3   5   5    8.84    0.37
   2  -5  -5   62.24    1.04
  -2   5   5   61.35    1.11
  -2   5   5   62.86    1.20
   1  -5  -5   16.23    0.35
   1  -5  -5   16.80    0.34
  -1   5   5   16.29    0.37
  -1   5   5   16.21    0.46
   0  -5  -5    0.02    0.02
   0  -5  -5    0.06    0.04
   0   5   5    0.02    0.05
  -1  -5  -5   90.63    1.39
  -1  -5  -5   89.60    1.48
   1   5   5   89.96    1.48
  -2  -5  -5    0.13    0.04
   2   5   5    0.09    0.05
   2   5   5    0.05    0.05
  -3  -5  -5   -0.09    0.03
   3   5   5    0.02    0.05
  -4  -5  -5    7.99    0.30
   4   5   5    7.16    0.29
  -5  -5  -5    3.28    0.22
   5   5   5    2.69    0.20
   6   5   5    1.07    0.25
  -5   6   5    0.20    0.11
   4  -6  -5    0.07    0.06
  -4   6   5    0.13    0.09
   3  -6  -5    1.48    0.14
  -3   6   5    1.73    0.19
  -3   6   5    1.56    0.20
   2  -6  -5   73.28    1.20
  -2   6   5   74.00    1.40
  -2   6   5   74.49    1.30
   1  -6  -5    0.49    0.09
   1  -6  -5    0.53    0.07
  -1   6   5    0.71    0.09
  -1   6   5    0.76    0.12
   0  -6  -5    4.20    0.15
   0  -6  -5    4.25    0.18
   0  -6  -5    4.16    0.12
   0   6   5    4.40    0.22
  -1  -6  -5   50.73    0.86
   1   6   5   51.66    0.96
   1   6   5   51.15    0.89
  -2  -6  -5    0.70    0.09
   2   6   5    0.75    0.10
   2   6   5    1.01    0.12
  -3  -6  -5    3.30    0.17
   3   6   5    3.63    0.20
  -4  -6  -5    2.90    0.19
   4   6   5    2.37    0.18
  -5  -6  -5    0.36    0.10
   5   6   5    0.52    0.12
   6   6   5    0.12    0.09
   4  -7  -5    0.48    0.10
  -4   7   5    0.35    0.13
   3  -7  -5    0.39    0.08
  -3   7   5    0.35    0.11
  -3   7   5    0.39    0.12
   2  -7  -5    1.92    0.12
  -2   7   5    1.83    0.21
  -2   7   5    2.45    0.18
   1  -7  -5    3.23    0.14
  -1   7   5    3.11    0.17
  -1   7   5    3.31    0.22
   0  -7  -5   13.78    0.33
   0  -7  -5   14.29    0.29
   0   7   5   14.15    0.44
   0   7   5   14.47    0.33
  -1  -7  -5   22.79    0.47
   1   7   5   22.49    0.49
   1   7   5   23.22    0.56
  -2  -7  -5   12.37    0.33
   2   7   5   11.92    0.36
   2   7   5   12.00    0.35
  -3  -7  -5    6.32    0.25
   3   7   5    6.27    0.27
  -4  -7  -5    1.00    0.13
   4   7   5    0.92    0.14
  -5  -7  -5    0.11    0.08
   5   7   5    0.35    0.10
   4  -8  -5    0.44    0.10
  -4   8   5    0.47    0.13
  -4   8   5    0.43    0.15
   3  -8  -5    0.44    0.09
  -3   8   5    0.38    0.13
  -3   8   5    0.45    0.12
   2  -8  -5   23.83    0.52
  -2   8   5   24.01    0.61
  -2   8   5   24.52    0.72
   1  -8  -5    1.19    0.10
   1  -8  -5    1.17    0.11
  -1   8   5    1.29    0.18
   0  -8  -5   10.73    0.29
   0   8   5   11.20    0.41
   0   8   5   10.99    0.28
  -1  -8  -5    4.83    0.19
   1   8   5    4.92    0.20
   1   8   5    4.57    0.24
  -2  -8  -5   20.71    0.47
   2   8   5   20.09    0.52
   2   8   5   19.73    0.49
  -3  -8  -5    0.13    0.06
   3   8   5    0.15    0.07
  -4  -8  -5    2.52    0.18
   4   8   5    2.69    0.20
  -5  -8  -5    2.13    0.21
   5   8   5    2.59    0.25
   4  -9  -5    0.65    0.12
  -4   9   5    0.48    0.17
  -4   9   5    0.56    0.16
   3  -9  -5    8.63    0.31
  -3   9   5    9.42    0.41
  -3   9   5    9.18    0.47
   2  -9  -5    0.09    0.06
  -2   9   5    0.47    0.15
   1  -9  -5   33.41    0.65
  -1   9   5   32.22    0.85
   0  -9  -5    2.12    0.12
   0   9   5    2.14    0.22
  -1  -9  -5   26.83    0.55
   1   9   5   25.24    0.66
   1   9   5   25.43    0.56
  -2  -9  -5    2.36    0.15
   2   9   5    2.32    0.16
   2   9   5    2.58    0.19
  -3  -9  -5   85.43    1.47
   3   9   5   85.76    1.52
  -4  -9  -5    7.69    0.32
   4   9   5    7.42    0.34
  -5  -9  -5    2.52    0.24
   5   9   5    2.57    0.26
  -4  10   5   -0.07    0.12
  -4  10   5   -0.05    0.10
   3 -10  -5    0.08    0.06
  -3  10   5    0.00    0.11
   2 -10  -5    3.37    0.18
  -2  10   5    4.35    0.33
   1 -10  -5   37.00    0.73
  -1  10   5   38.35    0.98
   0 -10  -5    0.13    0.06
   0  10   5    0.18    0.10
  -1 -10  -5    2.28    0.15
   1  10   5    2.23    0.15
   1  10   5    2.32    0.23
  -2 -10  -5    3.20    0.18
   2  10   5    3.08    0.19
  -3 -10  -5   17.74    0.48
   3  10   5   17.58    0.52
  -4 -10  -5    0.26    0.10
   4  10   5    0.19    0.10
  -5 -10  -5    0.69    0.14
   5  10   5    1.08    0.19
   3 -11  -5    4.20    0.22
  -3  11   5    3.40    0.37
   2 -11  -5    0.84    0.11
  -2  11   5    0.97    0.20
   1 -11  -5    0.09    0.05
  -1  11   5    0.17    0.11
   0 -11  -5    1.40    0.13
   0  11   5    1.88    0.24
  -1 -11  -5    0.43    0.08
   1  11   5    0.54    0.14
  -2 -11  -5    0.24    0.08
   2  11   5    0.05    0.06
  -3 -11  -5   17.14    0.49
   3  11   5   16.30    0.51
  -4 -11  -5    1.29    0.16
   4  11   5    1.14    0.16
   2 -12  -5    1.51    0.15
  -2  12   5    1.58    0.27
   1 -12  -5    0.06    0.06
  -1  12   5    0.06    0.11
   0 -12  -5    7.15    0.27
   0  12   5    7.53    0.42
  -1 -12  -5    2.33    0.16
   1  12   5    2.37    0.26
  -2 -12  -5    0.06    0.06
   2  12   5    0.05    0.06
  -3 -12  -5    0.04    0.07
   3  12   5    0.00    0.06
  -4 -12  -5   -0.01    0.06
   4  12   5    0.01    0.08
   2 -13  -5    0.93    0.13
   1 -13  -5    0.26    0.08
  -1  13   5    0.07    0.12
   0 -13  -5    0.08    0.07
   0  13   5    0.10    0.11
  -1 -13  -5    0.18    0.08
   1  13   5    0.23    0.13
  -2 -13  -5    5.48    0.27
  -3 -13  -5    2.57    0.20
   3  13   5    1.98    0.22
   1 -14  -5    0.00    0.07
   0 -14  -5    1.96    0.18
   0  14   5    2.21    0.30
  -1 -14  -5    0.86    0.13
   1  14   5    0.64    0.17
  -2 -14  -5    0.55    0.11
  -3 -14  -5    3.51    0.24
   3  14   5    3.71    0.25
   0  11  -6    0.11    0.14
   2  10  -6    2.10    0.22
  -2 -10   6    2.02    0.25
   1  10  -6    2.38    0.22
  -1 -10   6    2.65    0.26
   0  10  -6    0.73    0.21
   0 -10   6    0.89    0.17
  -1  10  -6    2.13    0.33
   1 -10   6    1.78    0.24
   3   9  -6    0.19    0.09
  -3  -9   6    0.39    0.14
   2   9  -6    0.84    0.14
  -2  -9   6    0.67    0.15
   1   9  -6    1.91    0.19
  -1  -9   6    1.28    0.18
   0   9  -6    6.55    0.43
   0  -9   6    6.47    0.33
  -1   9  -6    6.34    0.45
   1  -9   6    7.90    0.36
  -2   9  -6    5.40    0.44
   2  -9   6    6.10    0.33
   3   8  -6    0.17    0.08
  -3  -8   6    0.26    0.11
   2   8  -6    4.60    0.25
  -2  -8   6    4.81    0.30
   1   8  -6    0.28    0.13
   1   8  -6    0.22    0.08
  -1  -8   6    0.11    0.09
   0   8  -6    7.18    0.42
   0   8  -6    6.76    0.28
   0  -8   6    6.25    0.31
  -1   8  -6   10.07    0.54
   1  -8   6   10.44    0.40
  -2   8  -6    2.83    0.34
   2  -8   6    2.95    0.23
   3  -8   6   -0.07    0.12
   4   7  -6    5.98    0.31
  -4  -7   6    4.95    0.35
   3   7  -6   11.04    0.41
  -3  -7   6   11.22    0.47
   2   7  -6    0.39    0.10
  -2  -7   6    0.35    0.12
   1   7  -6    0.00    0.09
   1   7  -6    0.06    0.06
  -1  -7   6    0.02    0.07
   0   7  -6    5.23    0.24
   0   7  -6    4.61    0.33
   0  -7   6    5.10    0.26
  -1   7  -6    0.50    0.17
   1  -7   6    0.44    0.11
  -2   7  -6    1.89    0.29
   2  -7   6    2.38    0.20
  -3   7  -6    0.19    0.15
   3  -7   6    0.11    0.09
   4   6  -6    7.95    0.35
  -4  -6   6    8.48    0.43
   3   6  -6    4.15    0.23
  -3  -6   6    4.28    0.28
   2   6  -6    3.21    0.20
  -2  -6   6    2.88    0.23
   1   6  -6    2.06    0.24
   1   6  -6    2.01    0.15
  -1  -6   6    2.42    0.19
   0   6  -6    0.08    0.10
   0   6  -6    0.00    0.05
   0  -6   6    0.05    0.06
  -1   6  -6    8.31    0.29
  -1   6  -6    8.80    0.45
   1  -6   6    8.73    0.33
  -2   6  -6    3.59    0.36
   2  -6   6    3.87    0.22
  -3   6  -6    0.26    0.15
   3  -6   6    0.16    0.08
  -4   6  -6   -0.11    0.12
   4  -6   6   -0.02    0.08
   5   5  -6    0.08    0.07
   4   5  -6    0.44    0.11
  -4  -5   6    0.28    0.11
   3   5  -6    9.72    0.35
  -3  -5   6    9.81    0.41
   2   5  -6    2.18    0.16
  -2  -5   6    2.11    0.21
   1   5  -6    0.06    0.05
   1   5  -6    0.03    0.08
  -1  -5   6    0.10    0.07
   0   5  -6    4.93    0.22
   0   5  -6    5.44    0.33
   0  -5   6    5.37    0.24
  -1   5  -6   13.99    0.38
  -1   5  -6   13.13    0.54
   1  -5   6   13.83    0.40
  -2   5  -6    0.13    0.11
   2  -5   6   -0.04    0.04
  -3   5  -6    0.20    0.13
   3  -5   6    0.19    0.08
  -4   5  -6    0.18    0.14
   4  -5   6    0.20    0.10
   5   4  -6    2.88    0.21
  -5  -4   6    3.00    0.35
   4   4  -6    0.56    0.11
  -4  -4   6    0.48    0.13
   3   4  -6    0.28    0.08
  -3  -4   6    0.20    0.09
   2   4  -6    5.10    0.23
  -2  -4   6    4.60    0.25
   1   4  -6    6.61    0.25
   1   4  -6    6.75    0.33
  -1  -4   6    6.87    0.28
   0   4  -6   24.98    0.55
   0   4  -6   25.85    0.72
   0  -4   6   25.82    0.57
  -1   4  -6    5.21    0.22
  -1   4  -6    5.18    0.32
   1  -4   6    5.26    0.22
  -2   4  -6    0.85    0.12
  -2   4  -6    0.93    0.19
   2  -4   6    0.74    0.11
  -3   4  -6    0.23    0.13
   3  -4   6    0.33    0.09
  -4   4  -6    0.73    0.20
   4  -4   6    0.49    0.12
  -5  -3   6    0.03    0.11
   4   3  -6   12.65    0.40
  -4  -3   6   12.63    0.49
   3   3  -6    6.68    0.27
  -3  -3   6    6.61    0.32
   2   3  -6    2.97    0.17
  -2  -3   6    3.13    0.31
  -2  -3   6    2.91    0.19
   1   3  -6    0.12    0.05
  -1  -3   6    0.05    0.05
  -1  -3   6    0.10    0.07
   0   3  -6    4.19    0.26
   0   3  -6    4.18    0.18
   0  -3   6    4.32    0.19
  -1   3  -6    2.76    0.16
  -1   3  -6    2.69    0.23
   1  -3   6    2.79    0.15
  -2   3  -6    2.94    0.17
  -2   3  -6    2.80    0.29
   2  -3   6    2.60    0.15
  -3   3  -6   10.53    0.49
   3  -3   6   10.61    0.34
  -4   3  -6    1.61    0.25
   4  -3   6    1.13    0.14
   5  -3   6    0.44    0.11
   5   2  -6    0.04    0.06
  -5  -2   6   -0.02    0.09
   4   2  -6    6.48    0.26
   4   2  -6    5.90    0.26
  -4  -2   6    5.94    0.33
   3   2  -6   -0.01    0.04
   3   2  -6   -0.02    0.03
  -3  -2   6    0.00    0.07
   2   2  -6    3.43    0.17
  -2  -2   6    3.52    0.20
  -2  -2   6    3.35    0.18
   1   2  -6    0.62    0.09
  -1  -2   6    0.60    0.10
  -1  -2   6    0.45    0.08
   0   2  -6    5.54    0.29
   0   2  -6    5.42    0.20
   0  -2   6    5.48    0.20
  -1   2  -6    6.56    0.33
  -1   2  -6    6.37    0.23
   1  -2   6    5.96    0.21
  -2   2  -6    0.98    0.12
  -2   2  -6    0.99    0.18
   2  -2   6    0.73    0.09
  -3   2  -6    3.06    0.19
  -3   2  -6    3.07    0.31
   3  -2   6    3.07    0.18
  -4   2  -6    0.14    0.11
   4  -2   6    0.14    0.07
   5   1  -6    4.55    0.25
  -5  -1   6    4.89    0.34
   4   1  -6    1.77    0.16
   4   1  -6    1.73    0.14
  -4  -1   6    1.89    0.22
   3   1  -6   43.87    0.82
   3   1  -6   43.26    0.80
  -3  -1   6   43.49    0.94
   2   1  -6    2.44    0.14
   2   1  -6    2.59    0.12
  -2  -1   6    2.52    0.17
  -2  -1   6    2.99    0.17
   1   1  -6   10.80    0.21
   1   1  -6   10.84    0.29
  -1  -1   6   10.76    0.34
  -1  -1   6   10.74    0.31
   0   1  -6    5.37    0.20
   0   1  -6    5.61    0.12
   0  -1   6    5.10    0.25
   0  -1   6    5.72    0.19
  -1   1  -6   -0.01    0.03
  -1   1  -6    0.00    0.07
   1  -1   6   -0.01    0.03
  -2   1  -6   19.25    0.41
  -2   1  -6   18.99    0.60
  -2   1  -6   19.63    0.48
   2  -1   6   19.24    0.42
  -3   1  -6    0.04    0.09
  -3   1  -6    0.03    0.06
   3  -1   6    0.08    0.05
  -4   1  -6    1.29    0.21
  -4   1  -6    0.76    0.15
  -5   1  -6   -0.03    0.08
   5   0  -6    2.27    0.21
  -5   0   6    3.15    0.32
   4   0  -6    2.34    0.16
  -4   0   6    2.04    0.23
   3   0  -6   23.68    0.52
   3   0  -6   24.17    0.52
  -3   0   6   23.48    0.62
   2   0  -6    3.56    0.14
   2   0  -6    3.57    0.16
  -2   0   6    3.26    0.18
  -2   0   6    3.32    0.19
   1   0  -6    0.60    0.05
   1   0  -6    0.43    0.07
  -1   0   6    0.61    0.10
  -1   0   6    0.66    0.09
   0   0  -6   13.34    0.24
   0   0  -6   12.85    0.32
   0   0   6   13.06    0.39
   0   0   6   13.53    0.31
  -1   0  -6   14.17    0.27
  -1   0  -6   14.28    0.37
   1   0   6   14.60    0.43
   1   0   6   14.25    0.31
  -2   0  -6    3.22    0.24
  -2   0  -6    3.22    0.18
  -2   0  -6    3.16    0.13
   2   0   6    2.99    0.13
  -4   0  -6    3.60    0.19
  -4   0  -6    3.77    0.24
   5   0   6    0.19    0.09
   5  -1  -6    1.99    0.19
  -5   1   6    1.75    0.24
   4  -1  -6    1.07    0.13
  -4   1   6    1.31    0.18
   3  -1  -6    9.39    0.27
   3  -1  -6    9.17    0.29
  -3   1   6    9.41    0.36
   2  -1  -6   10.11    0.26
   2  -1  -6    9.96    0.27
  -2   1   6    9.73    0.32
  -2   1   6    9.92    0.32
   1  -1  -6    5.04    0.14
   1  -1  -6    5.15    0.18
  -1   1   6    5.15    0.19
  -1   1   6    5.00    0.22
   0  -1  -6   16.77    0.30
   0  -1  -6   17.29    0.39
   0   1   6   16.56    0.34
   0   1   6   16.63    0.44
  -1  -1  -6    3.51    0.17
  -1  -1  -6    3.31    0.11
   1   1   6    3.30    0.11
   1   1   6    3.65    0.20
  -2  -1  -6   59.98    0.98
  -2  -1  -6   62.16    1.10
   2   1   6   58.54    1.14
   2   1   6   62.66    0.97
  -3  -1  -6   33.88    0.72
  -3  -1  -6   34.76    0.67
  -3  -1  -6   35.25    0.76
   3   1   6   34.37    0.79
  -4  -1  -6    0.08    0.06
  -4  -1  -6    0.08    0.07
   4   1   6    0.16    0.06
   5  -2  -6    0.85    0.14
  -5   2   6    0.42    0.14
   4  -2  -6    2.31    0.17
  -4   2   6    2.36    0.24
   3  -2  -6    0.16    0.06
  -3   2   6    0.07    0.06
   2  -2  -6    1.66    0.10
   2  -2  -6    1.84    0.10
  -2   2   6    1.82    0.14
  -2   2   6    1.85    0.14
   1  -2  -6   87.78    1.37
   1  -2  -6   89.25    1.33
  -1   2   6   86.30    1.38
  -1   2   6   89.27    1.48
   0  -2  -6    0.12    0.03
   0  -2  -6    0.18    0.05
   0   2   6    0.08    0.05
   0   2   6    0.10    0.03
  -1  -2  -6    1.47    0.13
  -1  -2  -6    1.11    0.07
   1   2   6    1.26    0.06
   1   2   6    1.23    0.13
  -2  -2  -6   51.66    0.87
  -2  -2  -6   51.56    0.97
   2   2   6   53.21    1.00
   2   2   6   50.97    0.81
  -3  -2  -6   15.17    0.46
  -3  -2  -6   14.94    0.39
  -3  -2  -6   15.74    0.38
   3   2   6   14.39    0.45
  -4  -2  -6    1.63    0.16
   4   2   6    1.57    0.16
  -5  -2  -6   -0.04    0.05
   5  -3  -6    0.02    0.07
  -5   3   6    0.06    0.09
   4  -3  -6    0.06    0.05
  -4   3   6    0.04    0.08
   3  -3  -6    5.47    0.22
  -3   3   6    5.34    0.27
  -3   3   6    5.33    0.27
   2  -3  -6    0.73    0.08
   2  -3  -6    0.52    0.07
  -2   3   6    0.85    0.11
  -2   3   6    0.56    0.11
   1  -3  -6   66.12    1.03
   1  -3  -6   66.02    1.06
  -1   3   6   64.09    1.17
  -1   3   6   66.13    1.06
   0  -3  -6    0.02    0.02
   0  -3  -6   -0.04    0.03
   0   3   6    0.01    0.02
   0   3   6    0.03    0.05
  -1  -3  -6   14.07    0.30
   1   3   6   13.85    0.39
   1   3   6   14.17    0.23
  -2  -3  -6    3.64    0.20
  -2  -3  -6    4.05    0.16
   2   3   6    3.96    0.20
  -3  -3  -6    7.65    0.32
  -3  -3  -6    7.96    0.26
   3   3   6    7.40    0.30
  -4  -3  -6    2.10    0.16
   4   3   6    1.96    0.16
  -5  -3  -6    1.56    0.18
   5   3   6    1.05    0.14
   5  -4  -6    2.11    0.21
  -5   4   6    1.85    0.24
   4  -4  -6    0.08    0.06
  -4   4   6    0.12    0.09
   3  -4  -6    0.32    0.07
  -3   4   6    0.43    0.11
  -3   4   6    0.43    0.10
   2  -4  -6    4.04    0.17
  -2   4   6    4.06    0.23
  -2   4   6    4.14    0.20
   1  -4  -6   21.47    0.42
   1  -4  -6   21.52    0.44
  -1   4   6   21.55    0.44
  -1   4   6   21.62    0.54
   0  -4  -6    4.18    0.14
   0  -4  -6    4.70    0.18
   0   4   6    4.33    0.11
   0   4   6    4.38    0.21
  -1  -4  -6    5.68    0.23
  -1  -4  -6    5.72    0.18
   1   4   6    5.93    0.24
  -2  -4  -6    0.25    0.08
  -2  -4  -6    0.23    0.05
   2   4   6    0.15    0.06
  -3  -4  -6    0.68    0.10
   3   4   6    0.67    0.10
   3   4   6    0.79    0.11
  -4  -4  -6    2.01    0.18
   4   4   6    1.88    0.18
  -5  -4  -6    4.75    0.26
   5   4   6    4.47    0.26
  -5   5   6    1.36    0.22
   4  -5  -6    2.51    0.18
  -4   5   6    2.35    0.24
   3  -5  -6    3.30    0.17
  -3   5   6    3.21    0.21
  -3   5   6    3.61    0.24
   2  -5  -6    6.63    0.22
  -2   5   6    6.53    0.26
  -2   5   6    6.81    0.31
   1  -5  -6    0.42    0.06
   1  -5  -6    0.50    0.07
  -1   5   6    0.42    0.07
  -1   5   6    0.44    0.10
   0  -5  -6   18.65    0.38
   0  -5  -6   18.77    0.43
   0   5   6   19.70    0.50
  -1  -5  -6   20.17    0.48
  -1  -5  -6   19.33    0.40
   1   5   6   19.34    0.49
  -2  -5  -6   20.94    0.46
  -2  -5  -6   20.91    0.55
   2   5   6   20.65    0.50
  -3  -5  -6    0.23    0.07
   3   5   6    0.19    0.07
   3   5   6    0.31    0.08
  -4  -5  -6   15.30    0.44
   4   5   6   14.88    0.45
  -5  -5  -6    5.61    0.29
   5   5   6    5.75    0.29
   4  -6  -6    3.04    0.19
  -4   6   6    3.59    0.27
   3  -6  -6    5.35    0.23
  -3   6   6    5.42    0.28
  -3   6   6    5.66    0.32
   2  -6  -6    8.63    0.26
  -2   6   6    8.88    0.37
  -2   6   6    8.30    0.30
   1  -6  -6   20.88    0.43
   1  -6  -6   20.99    0.47
  -1   6   6   20.67    0.57
  -1   6   6   20.46    0.45
   0  -6  -6    8.92    0.24
   0  -6  -6    8.72    0.27
   0   6   6    9.03    0.34
  -1  -6  -6   30.00    0.66
  -1  -6  -6   29.29    0.57
   1   6   6   30.17    0.66
  -2  -6  -6    2.61    0.14
   2   6   6    2.67    0.17
   2   6   6    2.78    0.16
  -3  -6  -6    2.52    0.16
   3   6   6    2.50    0.17
  -4  -6  -6    4.67    0.24
   4   6   6    4.75    0.25
  -5  -6  -6    0.20    0.09
   5   6   6   -0.01    0.06
   6   6   6    0.05    0.14
   4  -7  -6    2.54    0.19
  -4   7   6    2.73    0.27
   3  -7  -6    0.38    0.08
  -3   7   6    0.46    0.13
  -3   7   6    0.26    0.09
   2  -7  -6   71.37    1.22
  -2   7   6   73.26    1.44
  -2   7   6   74.73    1.31
   1  -7  -6    0.58    0.08
  -1   7   6    0.67    0.12
  -1   7   6    0.63    0.13
   0  -7  -6    0.27    0.05
   0   7   6    0.29    0.09
  -1  -7  -6    0.03    0.04
   1   7   6   -0.04    0.05
   1   7   6    0.03    0.04
  -2  -7  -6   -0.01    0.04
   2   7   6    0.05    0.04
   2   7   6   -0.07    0.05
  -3  -7  -6    0.96    0.12
   3   7   6    1.23    0.15
  -4  -7  -6    1.17    0.15
   4   7   6    1.18    0.16
  -5  -7  -6    0.04    0.08
   5   7   6    0.04    0.07
   4  -8  -6    0.50    0.11
  -4   8   6    0.52    0.14
   3  -8  -6    1.93    0.17
  -3   8   6    1.84    0.24
  -3   8   6    2.06    0.21
   2  -8  -6   36.42    0.72
  -2   8   6   36.92    0.80
  -2   8   6   36.73    0.93
   1  -8  -6   -0.02    0.04
  -1   8   6    0.04    0.07
   0  -8  -6    0.31    0.06
   0   8   6    0.48    0.07
   0   8   6    0.52    0.12
  -1  -8  -6    1.42    0.11
   1   8   6    1.50    0.14
   1   8   6    1.39    0.16
  -2  -8  -6    1.98    0.13
   2   8   6    1.98    0.17
   2   8   6    2.22    0.15
  -3  -8  -6    3.57    0.20
   3   8   6    3.41    0.21
  -4  -8  -6   10.47    0.37
   4   8   6   10.06    0.39
  -5  -8  -6    0.60    0.13
   5   8   6    0.85    0.15
  -4   9   6    5.85    0.42
  -4   9   6    5.76    0.36
   3  -9  -6    1.37    0.15
  -3   9   6    0.89    0.17
  -3   9   6    1.10    0.21
   2  -9  -6    1.01    0.11
  -2   9   6    1.14    0.20
   1  -9  -6    0.72    0.09
  -1   9   6    1.04    0.18
   0  -9  -6   12.66    0.34
   0   9   6   12.04    0.45
  -1  -9  -6    9.61    0.29
   1   9   6    8.90    0.29
   1   9   6    9.52    0.38
  -2  -9  -6    3.96    0.20
   2   9   6    3.91    0.24
   2   9   6    3.67    0.20
  -3  -9  -6   23.01    0.57
   3   9   6   24.11    0.61
  -4  -9  -6   13.01    0.43
   4   9   6   12.44    0.45
  -5  -9  -6   14.02    0.49
   5   9   6   15.37    0.53
   3 -10  -6   -0.01    0.06
  -3  10   6   -0.08    0.10
   2 -10  -6    0.13    0.06
  -2  10   6   -0.03    0.09
   1 -10  -6    0.31    0.08
  -1  10   6    0.22    0.12
   0 -10  -6   21.85    0.50
   0  10   6   21.83    0.66
  -1 -10  -6   12.14    0.35
   1  10   6   12.01    0.36
   1  10   6   12.26    0.46
  -2 -10  -6    0.28    0.08
   2  10   6    0.31    0.10
   2  10   6    0.26    0.08
  -3 -10  -6   10.21    0.36
   3  10   6    9.67    0.37
  -4 -10  -6    6.55    0.31
   4  10   6    6.75    0.33
   3 -11  -6   11.50    0.38
  -3  11   6   11.04    0.58
   2 -11  -6    6.25    0.26
  -2  11   6    7.00    0.43
   1 -11  -6    0.07    0.06
  -1  11   6    0.03    0.10
   0 -11  -6    6.16    0.25
   0  11   6    6.31    0.36
  -1 -11  -6    0.03    0.06
   1  11   6   -0.13    0.06
  -2 -11  -6    1.88    0.18
   2  11   6    1.66    0.17
  -3 -11  -6    6.74    0.29
   3  11   6    7.27    0.33
  -4 -11  -6    2.53    0.24
   4  11   6    2.55    0.26
   2 -12  -6    0.36    0.10
  -2  12   6    0.12    0.14
   1 -12  -6    0.18    0.07
  -1  12   6    0.09    0.11
   0 -12  -6    0.26    0.08
   0  12   6    0.26    0.12
  -1 -12  -6    0.37    0.08
   1  12   6    0.34    0.12
  -2 -12  -6    0.37    0.09
  -3 -12  -6    0.17    0.08
   3  12   6    0.10    0.08
  -4 -12  -6    0.54    0.13
   4  12   6    0.84    0.16
   2 -13  -6    0.69    0.12
   1 -13  -6    0.06    0.06
  -1  13   6    0.14    0.13
   0 -13  -6    0.33    0.09
   0  13   6    0.46    0.15
  -1 -13  -6    1.40    0.15
   1  13   6    1.37    0.22
  -2 -13  -6    0.99    0.14
  -3 -13  -6    4.96    0.27
   3  13   6    4.47    0.27
   1 -14  -6    1.05    0.14
   0 -14  -6    3.99    0.23
   0  14   6    3.50    0.37
  -1 -14  -6    0.34    0.09
   1  14   6    0.42    0.15
  -2 -14  -6    2.81    0.21
  -3 -14  -6    1.60    0.21
   3  14   6    1.39    0.19
  -1 -15  -6    4.37    0.25
   1  10  -7    2.47    0.23
   0  10  -7    0.08    0.14
   2   9  -7    0.00    0.07
  -2  -9   7    0.18    0.11
   1   9  -7    0.01    0.07
  -1  -9   7   -0.08    0.07
   0   9  -7    0.21    0.14
   0  -9   7    0.06    0.09
  -1   9  -7    2.12    0.34
   1  -9   7    1.35    0.20
   3   8  -7    0.79    0.14
  -3  -8   7    0.77    0.18
   2   8  -7    0.08    0.07
  -2  -8   7    0.04    0.09
   1   8  -7    5.70    0.28
  -1  -8   7    5.02    0.31
   0   8  -7    3.82    0.39
   0   8  -7    3.85    0.23
   0  -8   7    3.50    0.25
  -1   8  -7    7.55    0.48
   1  -8   7    7.25    0.35
  -2   8  -7   24.74    0.93
   2  -8   7   26.55    0.72
   3   7  -7    3.74    0.25
  -3  -7   7    3.36    0.31
   2   7  -7    4.44    0.25
  -2  -7   7    4.09    0.28
   1   7  -7    9.30    0.35
   1   7  -7    9.80    0.48
  -1  -7   7    8.86    0.38
   0   7  -7   -0.03    0.05
   0   7  -7    0.02    0.11
   0  -7   7    0.09    0.08
  -1   7  -7    0.16    0.14
   1  -7   7    0.30    0.10
  -2   7  -7    2.13    0.33
   2  -7   7    2.20    0.22
  -3   7  -7    0.04    0.15
   3  -7   7    0.14    0.10
   4   6  -7    6.49    0.32
  -4  -6   7    6.06    0.38
   3   6  -7    0.87    0.15
  -3  -6   7    0.84    0.17
   2   6  -7   31.08    0.72
  -2  -6   7   29.57    0.78
   1   6  -7   13.35    0.41
   1   6  -7   12.86    0.53
  -1  -6   7   12.81    0.45
   0   6  -7    0.10    0.11
   0   6  -7    0.08    0.06
   0  -6   7    0.06    0.07
  -1   6  -7    8.12    0.47
  -1   6  -7    9.41    0.33
   1  -6   7    9.03    0.35
  -2   6  -7    0.46    0.18
   2  -6   7    0.43    0.11
  -3   6  -7    0.22    0.17
   3  -6   7    0.56    0.13
   4   5  -7    1.39    0.17
  -4  -5   7    1.17    0.21
   3   5  -7    0.28    0.09
  -3  -5   7    0.45    0.13
   2   5  -7    2.32    0.17
  -2  -5   7    2.60    0.24
   1   5  -7    0.43    0.13
   1   5  -7    0.27    0.08
  -1  -5   7    0.50    0.12
   0   5  -7    0.28    0.08
   0   5  -7    0.17    0.10
   0  -5   7    0.19    0.07
  -1   5  -7    5.95    0.39
  -1   5  -7    5.16    0.24
   1  -5   7    5.53    0.25
  -2   5  -7    1.74    0.26
   2  -5   7    2.16    0.17
  -3   5  -7    1.09    0.23
   3  -5   7    0.82    0.13
  -4   5  -7    6.28    0.47
   4  -5   7    7.12    0.34
   5   4  -7    0.00    0.07
   4   4  -7    0.59    0.11
  -4  -4   7    0.46    0.14
   3   4  -7    8.22    0.32
  -3  -4   7    8.05    0.37
   2   4  -7   15.42    0.44
  -2  -4   7   15.67    0.49
   1   4  -7    1.88    0.14
  -1  -4   7    2.06    0.21
  -1  -4   7    1.60    0.16
   0   4  -7   12.05    0.36
   0   4  -7   11.32    0.49
   0  -4   7   12.07    0.37
  -1   4  -7   33.94    0.93
  -1   4  -7   33.86    0.72
   1  -4   7   33.27    0.70
  -2   4  -7    0.18    0.11
  -2   4  -7    0.14    0.08
   2  -4   7    0.18    0.07
  -3   4  -7    0.14    0.13
   3  -4   7    0.06    0.07
  -4   4  -7    0.90    0.23
   4  -4   7    1.55    0.18
   4   3  -7    2.22    0.18
  -4  -3   7    2.30    0.26
   3   3  -7    1.16    0.14
  -3  -3   7    1.31    0.18
   2   3  -7   68.25    1.22
  -2  -3   7   68.83    1.29
   1   3  -7    7.06    0.26
  -1  -3   7    7.80    0.29
  -1  -3   7    7.16    0.32
   0   3  -7    0.35    0.12
   0   3  -7    0.41    0.08
   0  -3   7    0.44    0.09
  -1   3  -7    5.93    0.24
  -1   3  -7    6.07    0.36
   1  -3   7    6.24    0.24
  -2   3  -7    2.29    0.27
  -2   3  -7    1.92    0.15
   2  -3   7    1.94    0.14
  -3   3  -7    0.15    0.12
   3  -3   7    0.12    0.07
  -4   3  -7    0.46    0.16
   4  -3   7    0.48    0.11
   5  -3   7    0.54    0.13
  -5  -2   7    1.01    0.20
   4   2  -7    0.03    0.06
  -4  -2   7    0.03    0.09
   3   2  -7   37.75    0.79
  -3  -2   7   38.34    0.89
   2   2  -7   41.56    0.81
  -2  -2   7   41.97    0.88
  -2  -2   7   41.38    0.85
   1   2  -7    0.88    0.10
  -1  -2   7    1.02    0.12
  -1  -2   7    0.84    0.13
   0   2  -7    3.66    0.18
   0  -2   7    3.57    0.17
   0  -2   7    3.60    0.23
  -1   2  -7    0.37    0.12
  -1   2  -7    0.30    0.07
   1  -2   7    0.25    0.06
  -2   2  -7    2.54    0.17
  -2   2  -7    2.10    0.26
   2  -2   7    2.60    0.15
  -3   2  -7    0.74    0.18
  -3   2  -7    1.03    0.15
   3  -2   7    1.12    0.13
  -4   2  -7    0.09    0.12
   4  -2   7    0.35    0.09
  -5  -1   7    0.64    0.16
   4   1  -7    2.77    0.20
   4   1  -7    2.59    0.17
  -4  -1   7    2.96    0.25
   3   1  -7   11.15    0.34
  -3  -1   7   10.72    0.41
   2   1  -7   15.26    0.39
  -2  -1   7   14.68    0.43
  -2  -1   7   15.02    0.44
   1   1  -7    5.67    0.22
  -1  -1   7    5.64    0.26
  -1  -1   7    5.67    0.23
   0   1  -7   10.93    0.32
   0  -1   7   10.55    0.39
   0  -1   7   10.96    0.30
  -1   1  -7    4.96    0.22
   1  -1   7    5.54    0.19
  -2   1  -7    0.25    0.12
  -2   1  -7    0.26    0.08
   2  -1   7    0.32    0.06
  -3   1  -7    8.38    0.34
  -3   1  -7    9.12    0.46
   3  -1   7    8.75    0.29
  -4   1  -7    1.28    0.23
   4  -1   7    1.68    0.16
   5   0  -7    0.01    0.06
  -5   0   7    0.11    0.10
   4   0  -7    1.37    0.15
  -4   0   7    1.62    0.21
   3   0  -7    0.21    0.07
   3   0  -7    0.16    0.05
  -3   0   7    0.14    0.08
   2   0  -7    1.42    0.11
   2   0  -7    1.24    0.09
  -2   0   7    1.27    0.14
  -2   0   7    1.16    0.14
   1   0  -7   13.11    0.34
   1   0  -7   12.29    0.25
  -1   0   7   13.01    0.40
  -1   0   7   12.91    0.35
   0   0  -7   14.82    0.28
   0   0  -7   14.27    0.38
   0   0   7   15.02    0.35
   0   0   7   14.92    0.45
  -1   0  -7    0.01    0.05
   1   0   7    0.03    0.03
   1   0   7    0.01    0.06
  -2   0  -7    1.76    0.17
   2   0   7    1.44    0.10
  -3   0  -7   63.62    1.40
  -3   0  -7   66.56    1.24
   3   0   7   65.87    1.12
  -4   0  -7    1.85    0.25
   5  -1  -7    2.10    0.20
  -5   1   7    2.50    0.29
   4  -1  -7    0.51    0.10
  -4   1   7    0.38    0.12
   3  -1  -7    5.16    0.21
   3  -1  -7    4.84    0.20
  -3   1   7    4.54    0.26
   2  -1  -7    5.75    0.18
   2  -1  -7    5.41    0.21
  -2   1   7    5.53    0.25
  -2   1   7    5.67    0.25
   1  -1  -7    0.05    0.04
   1  -1  -7    0.09    0.03
  -1   1   7    0.03    0.05
  -1   1   7    0.06    0.05
   0  -1  -7   85.63    1.39
   0  -1  -7   84.93    1.26
   0   1   7   86.74    1.33
   0   1   7   85.07    1.49
  -1  -1  -7   17.13    0.44
  -1  -1  -7   17.72    0.34
   1   1   7   17.21    0.50
   1   1   7   17.48    0.35
  -2  -1  -7    0.00    0.03
  -2  -1  -7   -0.03    0.05
   2   1   7    0.02    0.03
   2   1   7   -0.02    0.05
  -3  -1  -7   11.69    0.41
  -3  -1  -7   11.30    0.32
   3   1   7   12.11    0.44
  -4  -1  -7    9.23    0.39
  -4  -1  -7    9.19    0.31
   5  -2  -7    0.05    0.07
  -5   2   7    0.27    0.13
   4  -2  -7    8.29    0.31
  -4   2   7    8.46    0.39
   3  -2  -7   49.27    0.89
  -3   2   7   48.19    1.01
   2  -2  -7    1.22    0.09
   2  -2  -7    1.12    0.10
  -2   2   7    1.51    0.15
  -2   2   7    1.46    0.16
   1  -2  -7    2.34    0.10
   1  -2  -7    2.11    0.13
  -1   2   7    2.32    0.13
  -1   2   7    2.63    0.18
   0  -2  -7    0.87    0.06
   0  -2  -7    0.71    0.09
   0   2   7    0.85    0.12
   0   2   7    1.01    0.07
  -1  -2  -7   10.28    0.24
  -1  -2  -7   10.44    0.32
   1   2   7   10.04    0.35
   1   2   7   10.03    0.22
  -2  -2  -7    3.19    0.14
  -2  -2  -7    3.19    0.19
   2   2   7    3.02    0.21
  -3  -2  -7   28.57    0.60
  -3  -2  -7   29.87    0.71
   3   2   7   29.66    0.72
  -4  -2  -7    0.15    0.07
   4   2   7    0.19    0.08
  -5  -2  -7    0.55    0.11
   5  -3  -7    0.21    0.09
  -5   3   7    0.04    0.10
   4  -3  -7    0.00    0.05
  -4   3   7   -0.03    0.08
   3  -3  -7   12.06    0.34
  -3   3   7   11.05    0.41
  -3   3   7   12.05    0.41
   2  -3  -7    0.00    0.03
   2  -3  -7    0.06    0.04
  -2   3   7    0.05    0.05
  -2   3   7    0.04    0.06
   1  -3  -7    0.00    0.03
   1  -3  -7    0.04    0.04
  -1   3   7    0.00    0.05
  -1   3   7    0.02    0.04
   0  -3  -7   13.75    0.36
   0  -3  -7   13.17    0.28
   0   3   7   13.04    0.27
   0   3   7   13.69    0.42
  -1  -3  -7   12.58    0.36
  -1  -3  -7   12.92    0.29
   1   3   7   12.93    0.40
  -2  -3  -7   15.90    0.46
  -2  -3  -7   15.97    0.37
   2   3   7   15.50    0.46
  -3  -3  -7    0.64    0.13
  -3  -3  -7    0.69    0.10
   3   3   7    0.64    0.12
  -4  -3  -7    0.31    0.08
   4   3   7    0.27    0.08
  -5  -3  -7    0.71    0.13
   5   3   7    0.56    0.11
   5  -4  -7    0.52    0.17
  -5   4   7    0.65    0.16
   4  -4  -7    4.49    0.23
  -4   4   7    4.42    0.29
   3  -4  -7    4.41    0.20
  -3   4   7    4.57    0.25
  -3   4   7    4.36    0.27
   2  -4  -7    4.00    0.16
  -2   4   7    3.94    0.20
  -2   4   7    3.50    0.22
   1  -4  -7   19.62    0.40
   1  -4  -7   19.38    0.43
  -1   4   7   18.85    0.52
  -1   4   7   19.71    0.42
   0  -4  -7   10.87    0.31
   0  -4  -7   10.41    0.25
   0   4   7   10.05    0.36
  -1  -4  -7    4.99    0.17
  -1  -4  -7    5.14    0.23
   1   4   7    5.07    0.25
  -2  -4  -7    5.25    0.19
  -2  -4  -7    5.30    0.25
   2   4   7    5.01    0.25
  -3  -4  -7    0.05    0.05
  -3  -4  -7    0.01    0.07
   3   4   7    0.11    0.07
  -4  -4  -7    0.27    0.08
   4   4   7    0.15    0.08
  -5  -4  -7    0.31    0.10
   5   4   7    0.30    0.10
  -5   5   7    3.33    0.36
   4  -5  -7   -0.03    0.05
  -4   5   7    0.06    0.07
   3  -5  -7    1.34    0.13
  -3   5   7    1.73    0.18
  -3   5   7    1.45    0.19
   2  -5  -7    3.58    0.16
  -2   5   7    3.89    0.24
  -2   5   7    3.71    0.19
   1  -5  -7   38.76    0.73
   1  -5  -7   39.83    0.70
  -1   5   7   40.13    0.88
  -1   5   7   41.19    0.77
   0  -5  -7    5.57    0.22
   0  -5  -7    5.43    0.18
   0   5   7    5.61    0.27
  -1  -5  -7    0.09    0.06
  -1  -5  -7    0.04    0.03
   1   5   7    0.01    0.05
  -2  -5  -7   17.88    0.50
  -2  -5  -7   17.57    0.41
   2   5   7   17.45    0.49
  -3  -5  -7    0.03    0.05
   3   5   7    0.03    0.05
   3   5   7   -0.04    0.04
  -4  -5  -7    0.12    0.07
   4   5   7    0.11    0.07
  -5  -5  -7    0.19    0.09
   5   5   7    0.09    0.07
   4  -6  -7    0.03    0.05
  -4   6   7   -0.02    0.08
   3  -6  -7    0.66    0.09
  -3   6   7    0.94    0.16
  -3   6   7    0.87    0.14
   2  -6  -7    0.16    0.05
  -2   6   7    0.27    0.10
  -2   6   7    0.19    0.07
   1  -6  -7    8.83    0.27
   1  -6  -7    8.61    0.25
  -1   6   7    8.90    0.36
   0  -6  -7    0.68    0.10
   0  -6  -7    0.65    0.07
   0   6   7    0.72    0.12
  -1  -6  -7    9.48    0.33
  -1  -6  -7    9.98    0.27
   1   6   7    9.38    0.35
  -2  -6  -7   -0.01    0.05
  -2  -6  -7   -0.01    0.03
   2   6   7    0.05    0.05
  -3  -6  -7    0.43    0.09
   3   6   7    0.35    0.14
   3   6   7    0.41    0.09
  -4  -6  -7    3.81    0.22
   4   6   7    3.37    0.22
  -5  -6  -7   12.51    0.44
   5   6   7   12.21    0.45
   4  -7  -7   -0.01    0.06
  -4   7   7    0.05    0.08
   3  -7  -7    5.69    0.24
  -3   7   7    5.38    0.28
  -3   7   7    6.10    0.36
   2  -7  -7    1.11    0.11
  -2   7   7    1.48    0.20
   1  -7  -7   14.94    0.37
  -1   7   7   15.65    0.51
   0  -7  -7    1.50    0.14
   0  -7  -7    1.45    0.10
   0   7   7    1.32    0.16
  -1  -7  -7    0.06    0.04
  -1  -7  -7    0.10    0.07
   1   7   7    0.11    0.07
  -2  -7  -7   18.05    0.44
   2   7   7   17.68    0.49
   2   7   7   17.60    0.47
  -3  -7  -7    7.54    0.29
   3   7   7    8.12    0.32
  -4  -7  -7    0.68    0.12
   4   7   7    0.84    0.14
  -5  -7  -7    1.42    0.19
   5   7   7    1.43    0.19
   4  -8  -7    0.11    0.07
   3  -8  -7    0.01    0.05
  -3   8   7    0.07    0.10
   2  -8  -7    1.94    0.14
  -2   8   7    2.12    0.25
   1  -8  -7   46.56    0.86
  -1   8   7   48.29    1.08
   0  -8  -7    9.34    0.28
   0   8   7    9.20    0.38
   0   8   7    9.22    0.28
  -1  -8  -7    5.30    0.21
   1   8   7    5.82    0.29
   1   8   7    5.90    0.23
  -2  -8  -7    0.13    0.06
   2   8   7    0.16    0.08
   2   8   7    0.12    0.06
  -3  -8  -7   19.75    0.51
   3   8   7   19.16    0.54
  -4  -8  -7    1.42    0.17
   4   8   7    1.56    0.18
  -5  -8  -7   -0.04    0.07
   5   8   7    0.10    0.08
   3  -9  -7    0.00    0.05
  -3   9   7    0.03    0.10
   2  -9  -7    0.68    0.10
  -2   9   7    0.63    0.15
   1  -9  -7    9.14    0.29
  -1   9   7    9.04    0.42
   0  -9  -7    8.67    0.28
   0   9   7    8.72    0.40
  -1  -9  -7    0.07    0.05
   1   9   7    0.12    0.06
   1   9   7    0.10    0.08
  -2  -9  -7   13.26    0.38
   2   9   7   13.01    0.40
   2   9   7   13.50    0.45
  -3  -9  -7    2.07    0.19
   3   9   7    1.74    0.19
  -4  -9  -7    4.96    0.27
   4   9   7    5.48    0.29
  -5  -9  -7    0.34    0.11
   5   9   7    0.55    0.14
   3 -10  -7    3.30    0.20
  -3  10   7    4.40    0.36
   2 -10  -7    0.65    0.11
  -2  10   7    0.80    0.18
   1 -10  -7    5.72    0.24
  -1  10   7    5.90    0.36
   0 -10  -7   32.85    0.67
   0  10   7   32.40    0.86
  -1 -10  -7    1.43    0.14
   1  10   7    1.35    0.19
   1  10   7    1.32    0.14
  -2 -10  -7    5.47    0.25
   2  10   7    5.75    0.26
   2  10   7    5.83    0.31
  -3 -10  -7    2.04    0.19
   3  10   7    1.89    0.19
  -4 -10  -7   43.82    0.95
   4  10   7   43.20    0.99
  -3  11   7    0.92    0.22
   2 -11  -7    0.18    0.08
  -2  11   7    0.16    0.14
   1 -11  -7    1.87    0.15
  -1  11   7    1.82    0.26
   0 -11  -7    0.08    0.06
   0  11   7    0.11    0.09
  -1 -11  -7   14.45    0.42
   1  11   7   15.67    0.55
  -2 -11  -7    1.72    0.17
   2  11   7    1.47    0.16
   2  11   7    1.90    0.25
  -3 -11  -7    1.64    0.18
   3  11   7    1.72    0.20
  -4 -11  -7   13.25    0.46
   4  11   7   12.68    0.48
   2 -12  -7    9.96    0.35
  -2  12   7    9.37    0.53
   1 -12  -7    0.18    0.07
  -1  12   7    0.43    0.16
   0 -12  -7    0.98    0.13
   0  12   7    0.96    0.19
  -1 -12  -7    4.79    0.24
   1  12   7    4.16    0.31
  -2 -12  -7    3.30    0.21
   2  12   7    3.31    0.22
  -3 -12  -7    0.55    0.13
   3  12   7    0.28    0.09
  -4 -12  -7    0.93    0.17
   4  12   7    0.85    0.16
   1 -13  -7    0.25    0.08
  -1  13   7   -0.02    0.11
   0 -13  -7    1.60    0.17
   0  13   7    1.75    0.25
  -1 -13  -7    0.25    0.09
   1  13   7    0.06    0.11
  -2 -13  -7    0.14    0.08
  -3 -13  -7    0.49    0.12
   3  13   7    0.48    0.12
   0 -14  -7    0.41    0.10
   0  14   7    0.41    0.16
  -1 -14  -7    0.23    0.08
   1  14   7    0.01    0.11
  -2 -14  -7    0.83    0.14
   3  14   7    5.67    0.31
   1  15   7    1.48    0.28
   1   9  -8   -0.02    0.07
   0   9  -8    0.84    0.22
   2   8  -8    2.54    0.24
  -2  -8   8    2.38    0.27
   1   8  -8    1.35    0.17
  -1  -8   8    1.13    0.18
   0   8  -8    2.38    0.33
   0   8  -8    2.30    0.21
   0  -8   8    2.29    0.24
  -1   8  -8    0.11    0.15
   1  -8   8    0.09    0.11
   3   7  -8    0.27    0.10
  -3  -7   8    0.27    0.13
   2   7  -8    5.37    0.29
  -2  -7   8    5.85    0.34
   1   7  -8    0.45    0.11
  -1  -7   8    0.42    0.13
   0   7  -8    0.41    0.10
   0   7  -8    0.29    0.15
   0  -7   8    0.47    0.12
  -1   7  -8    0.44    0.18
   1  -7   8    0.59    0.13
  -2   7  -8   11.27    0.64
   2  -7   8   11.49    0.44
   3   6  -8    2.77    0.22
  -3  -6   8    2.74    0.28
   2   6  -8    1.73    0.18
  -2  -6   8    2.21    0.24
   1   6  -8   25.90    0.66
  -1  -6   8   27.28    0.71
   0   6  -8   -0.10    0.10
   0   6  -8   -0.02    0.05
   0  -6   8    0.02    0.07
  -1   6  -8    0.27    0.14
  -1   6  -8    0.27    0.09
   1  -6   8    0.20    0.09
  -2   6  -8    4.62    0.46
   2  -6   8    4.73    0.27
  -3   6  -8    0.02    0.15
   3  -6   8   -0.03    0.08
   4   5  -8    4.24    0.26
  -4  -5   8    4.33    0.34
   3   5  -8    1.39    0.17
  -3  -5   8    1.44    0.21
   2   5  -8   -0.02    0.06
  -2  -5   8    0.02    0.07
   1   5  -8   10.82    0.38
  -1  -5   8   10.67    0.40
  -1  -5   8   10.40    0.44
   0   5  -8    0.66    0.18
   0   5  -8    0.94    0.13
   0  -5   8    0.81    0.13
  -1   5  -8    1.27    0.23
  -1   5  -8    1.64    0.17
   1  -5   8    1.36    0.16
  -2   5  -8    0.00    0.10
   2  -5   8    0.05    0.07
  -3   5  -8    0.33    0.17
   3  -5   8    0.46    0.12
   4  -5   8    0.38    0.18
   4   4  -8    0.09    0.07
  -4  -4   8   -0.04    0.08
   3   4  -8    3.25    0.21
  -3  -4   8    3.63    0.27
   2   4  -8    0.01    0.05
  -2  -4   8    0.00    0.07
   1   4  -8    5.21    0.25
  -1  -4   8    5.36    0.26
  -1  -4   8    5.86    0.32
   0   4  -8    3.95    0.21
   0   4  -8    4.34    0.33
   0  -4   8    4.40    0.23
  -1   4  -8    0.42    0.16
  -1   4  -8    0.65    0.11
   1  -4   8    0.48    0.10
  -2   4  -8    1.55    0.17
  -2   4  -8    2.01    0.29
   2  -4   8    1.70    0.17
  -3   4  -8    3.05    0.36
   3  -4   8    2.37    0.19
  -4   4  -8    0.59    0.20
   4  -4   8    1.00    0.15
   4   3  -8    1.28    0.16
  -4  -3   8    1.01    0.18
   3   3  -8   15.12    0.46
  -3  -3   8   14.39    0.52
   2   3  -8    3.57    0.20
  -2  -3   8    3.98    0.24
   1   3  -8   10.86    0.36
  -1  -3   8   10.73    0.37
  -1  -3   8   11.23    0.43
   0   3  -8    0.60    0.10
   0  -3   8    0.41    0.09
  -1   3  -8    6.01    0.26
  -1   3  -8    6.55    0.40
   1  -3   8    5.85    0.24
  -2   3  -8    2.58    0.19
  -2   3  -8    2.78    0.33
   2  -3   8    2.80    0.18
  -3   3  -8    1.63    0.26
   3  -3   8    1.53    0.16
  -4   3  -8    8.98    0.54
   4  -3   8    8.35    0.40
   4   2  -8   -0.01    0.05
  -4  -2   8    0.02    0.09
   3   2  -8    1.61    0.16
  -3  -2   8    1.67    0.21
   2   2  -8   33.58    0.73
  -2  -2   8   34.70    0.79
   1   2  -8    0.19    0.07
  -1  -2   8    0.34    0.09
  -1  -2   8    0.20    0.08
   0   2  -8    1.79    0.14
   0  -2   8    1.17    0.12
   0  -2   8    1.33    0.17
  -1   2  -8   11.19    0.36
  -1   2  -8   11.50    0.51
   1  -2   8   11.29    0.33
  -2   2  -8    1.69    0.26
  -2   2  -8    1.90    0.19
   2  -2   8    1.58    0.13
  -3   2  -8   -0.02    0.11
  -3   2  -8    0.04    0.07
   3  -2   8   -0.01    0.05
  -4   2  -8    3.50    0.38
   4   1  -8    0.77    0.12
  -4  -1   8    0.45    0.13
   3   1  -8    0.13    0.06
  -3  -1   8    0.17    0.09
   2   1  -8   81.11    1.39
  -2  -1   8   81.31    1.46
  -2  -1   8   81.09    1.45
   1   1  -8    9.12    0.30
  -1  -1   8    9.48    0.37
  -1  -1   8    9.04    0.31
   0   1  -8    0.03    0.04
   0  -1   8    0.05    0.07
   0  -1   8    0.01    0.04
  -1   1  -8    2.21    0.16
   1  -1   8    1.97    0.13
   1  -1   8    2.10    0.22
  -2   1  -8    0.07    0.06
   2  -1   8    0.09    0.05
  -3   1  -8    0.79    0.18
  -3   1  -8    1.03    0.16
  -4   1  -8    0.37    0.15
  -4   0   8    1.01    0.18
   3   0  -8    0.09    0.06
  -3   0   8   -0.03    0.07
   2   0  -8   10.57    0.33
  -2   0   8   10.80    0.38
  -2   0   8   10.78    0.37
   1   0  -8    0.76    0.10
  -1   0   8    0.65    0.12
  -1   0   8    0.67    0.10
   0   0  -8    1.11    0.13
   0   0   8    1.05    0.15
   0   0   8    0.85    0.10
  -1   0  -8   10.02    0.34
   1   0   8   10.18    0.41
   1   0   8   10.40    0.28
  -2   0  -8    3.56    0.21
   2   0   8    2.78    0.16
   2   0   8    3.27    0.24
  -3   0  -8    7.21    0.33
   3   0   8    6.52    0.35
  -4   0  -8    1.00    0.21
   4   0   8    1.20    0.19
   5  -1  -8    0.46    0.11
  -5   1   8    0.43    0.17
   4  -1  -8    7.00    0.28
  -4   1   8    7.21    0.37
   3  -1  -8    4.49    0.19
   3  -1  -8    4.35    0.21
  -3   1   8    4.08    0.25
   2  -1  -8   14.71    0.40
   2  -1  -8   14.93    0.34
  -2   1   8   15.84    0.45
  -2   1   8   15.31    0.47
   1  -1  -8   20.69    0.38
   1  -1  -8   20.88    0.48
  -1   1   8   20.42    0.48
  -1   1   8   20.29    0.56
   0  -1  -8   23.76    0.55
   0   1   8   25.80    0.50
   0   1   8   24.86    0.64
  -1  -1  -8    0.79    0.11
   1   1   8    1.08    0.16
  -2  -1  -8    0.15    0.07
   2   1   8    0.17    0.09
  -3  -1  -8  119.63    2.05
   3   1   8  120.00    2.13
  -4  -1  -8   35.01    0.87
   4   1   8   34.44    0.99
   5  -2  -8    1.45    0.17
  -5   2   8    1.37    0.21
   4  -2  -8    1.01    0.13
  -4   2   8    1.29    0.20
   3  -2  -8    8.99    0.29
  -3   2   8    9.81    0.38
   2  -2  -8    1.24    0.13
   2  -2  -8    0.99    0.09
  -2   2   8    1.22    0.14
  -2   2   8    1.00    0.14
   1  -2  -8    7.54    0.26
   1  -2  -8    7.38    0.20
  -1   2   8    7.55    0.25
  -1   2   8    7.39    0.31
   0  -2  -8   13.77    0.38
   0  -2  -8   14.11    0.29
   0   2   8   14.21    0.45
   0   2   8   14.91    0.45
  -1  -2  -8    4.13    0.15
  -1  -2  -8    4.08    0.21
   1   2   8    4.57    0.26
  -2  -2  -8    0.62    0.11
  -2  -2  -8    0.65    0.08
   2   2   8    0.61    0.12
  -3  -2  -8   10.30    0.31
  -3  -2  -8   10.30    0.40
   3   2   8    9.85    0.41
  -4  -2  -8    2.08    0.16
  -4  -2  -8    2.30    0.25
  -5   3   8    0.74    0.19
   4  -3  -8    8.92    0.32
  -4   3   8    8.75    0.41
   3  -3  -8    4.41    0.20
  -3   3   8    4.37    0.25
   2  -3  -8    7.05    0.22
   2  -3  -8    6.49    0.24
  -2   3   8    6.61    0.27
  -2   3   8    6.45    0.30
   1  -3  -8    1.23    0.08
   1  -3  -8    1.36    0.13
  -1   3   8    0.98    0.10
  -1   3   8    1.83    0.19
   0  -3  -8   97.72    1.59
   0  -3  -8   95.90    1.46
   0   3   8   95.69    1.68
  -1  -3  -8    1.48    0.09
   1   3   8    1.58    0.17
  -2  -3  -8    9.54    0.27
  -2  -3  -8   10.21    0.37
   2   3   8   10.29    0.39
  -3  -3  -8    0.61    0.10
  -3  -3  -8    0.56    0.12
   3   3   8    0.66    0.13
  -4  -3  -8    0.48    0.10
  -5  -3  -8    0.30    0.10
   5   3   8    0.24    0.09
   4  -4  -8    4.60    0.23
  -4   4   8    4.74    0.30
   3  -4  -8    1.73    0.13
  -3   4   8    1.85    0.19
  -3   4   8    1.71    0.20
   2  -4  -8    4.13    0.17
  -2   4   8    4.26    0.21
  -2   4   8    4.45    0.26
   1  -4  -8    2.03    0.11
   1  -4  -8    2.12    0.14
  -1   4   8    2.20    0.18
   0  -4  -8    0.48    0.06
   0  -4  -8    0.45    0.09
   0   4   8    0.40    0.10
  -1  -4  -8    0.30    0.08
  -1  -4  -8    0.23    0.05
   1   4   8    0.20    0.08
  -2  -4  -8    0.53    0.08
  -2  -4  -8    0.46    0.10
   2   4   8    0.66    0.13
  -3  -4  -8    0.05    0.08
  -3  -4  -8    0.10    0.05
   3   4   8    0.13    0.08
  -4  -4  -8    0.38    0.09
   4   4   8    0.33    0.10
  -5  -4  -8    2.50    0.23
   5   4   8    1.96    0.22
   4  -5  -8    0.47    0.10
  -4   5   8    0.31    0.12
   3  -5  -8    0.14    0.05
  -3   5   8    0.14    0.08
  -3   5   8    0.20    0.10
   2  -5  -8    7.42    0.25
  -2   5   8    7.54    0.35
   1  -5  -8    8.10    0.27
   1  -5  -8    8.00    0.24
  -1   5   8    7.96    0.34
   0  -5  -8    0.02    0.04
   0  -5  -8    0.01    0.03
   0   5   8    0.09    0.07
  -1  -5  -8    4.42    0.23
  -1  -5  -8    4.40    0.17
   1   5   8    4.27    0.24
  -2  -5  -8   23.11    0.61
  -2  -5  -8   22.76    0.51
   2   5   8   23.67    0.62
  -3  -5  -8    3.43    0.25
  -3  -5  -8    3.24    0.18
   3   5   8    3.33    0.22
  -4  -5  -8    0.10    0.07
   4   5   8    0.06    0.07
  -5  -5  -8    7.66    0.34
   5   5   8    8.13    0.37
   4  -6  -8    0.73    0.11
  -4   6   8    0.99    0.17
   3  -6  -8    4.91    0.22
  -3   6   8    5.10    0.32
   2  -6  -8    2.05    0.13
  -2   6   8    2.43    0.25
   1  -6  -8   27.64    0.61
   1  -6  -8   30.80    0.59
  -1   6   8   30.71    0.77
   0  -6  -8    3.68    0.16
   0  -6  -8    3.78    0.20
   0   6   8    4.15    0.24
  -1  -6  -8    1.85    0.12
  -1  -6  -8    1.85    0.18
   1   6   8    1.93    0.20
  -2  -6  -8   29.19    0.73
  -2  -6  -8   29.54    0.61
   2   6   8   29.66    0.72
  -3  -6  -8    0.03    0.06
   3   6   8   -0.04    0.05
   3   6   8   -0.03    0.05
  -4  -6  -8    3.74    0.22
   4   6   8    3.77    0.24
  -5  -6  -8    0.28    0.10
   5   6   8    0.22    0.10
   4  -7  -8    1.33    0.16
   3  -7  -8    0.32    0.08
  -3   7   8    0.33    0.12
   2  -7  -8    0.02    0.05
  -2   7   8   -0.06    0.07
   1  -7  -8   84.90    1.39
  -1   7   8   87.20    1.62
   0  -7  -8    0.33    0.07
   0  -7  -8    0.39    0.09
   0   7   8    0.56    0.13
  -1  -7  -8    2.39    0.18
  -1  -7  -8    2.19    0.13
   1   7   8    2.53    0.20
  -2  -7  -8    0.15    0.06
   2   7   8    0.08    0.07
  -3  -7  -8    0.98    0.13
   3   7   8    0.83    0.13
  -4  -7  -8    0.14    0.08
   4   7   8    0.05    0.07
  -5  -7  -8    0.63    0.13
   5   7   8    0.45    0.12
   3  -8  -8    4.95    0.24
  -3   8   8    4.15    0.32
   2  -8  -8    0.01    0.05
  -2   8   8    0.04    0.08
   1  -8  -8    2.09    0.14
  -1   8   8    2.05    0.23
   0  -8  -8    2.35    0.17
   0  -8  -8    2.38    0.14
   0   8   8    2.56    0.22
  -1  -8  -8   12.81    0.35
   1   8   8   12.71    0.46
  -2  -8  -8    4.47    0.21
   2   8   8    4.16    0.25
   2   8   8    4.48    0.23
  -3  -8  -8    4.67    0.24
   3   8   8    4.43    0.25
  -4  -8  -8    1.98    0.20
   4   8   8    1.79    0.20
  -5  -8  -8   -0.03    0.08
   5   8   8    0.04    0.08
   3  -9  -8   -0.02    0.05
  -3   9   8    0.18    0.12
   2  -9  -8    4.96    0.22
  -2   9   8    4.68    0.33
   1  -9  -8    6.48    0.25
  -1   9   8    6.54    0.37
   0  -9  -8    4.65    0.20
   0   9   8    4.80    0.30
  -1  -9  -8    0.89    0.11
   1   9   8    1.12    0.17
   1   9   8    0.70    0.11
  -2  -9  -8    3.80    0.20
   2   9   8    3.07    0.23
   2   9   8    3.53    0.21
  -3  -9  -8    2.79    0.19
   3   9   8    2.58    0.20
  -4  -9  -8   24.29    0.64
   4   9   8   23.81    0.67
   3 -10  -8    0.87    0.13
  -3  10   8    1.36    0.25
   2 -10  -8    2.12    0.16
  -2  10   8    2.55    0.30
   1 -10  -8    4.89    0.22
  -1  10   8    5.11    0.34
   0 -10  -8    0.37    0.08
   0  10   8    0.39    0.13
  -1 -10  -8   12.75    0.38
   1  10   8   12.13    0.38
   1  10   8   12.76    0.49
  -2 -10  -8    0.37    0.09
   2  10   8    0.17    0.09
   2  10   8    0.38    0.10
  -3 -10  -8    1.77    0.18
   3  10   8    1.76    0.19
  -4 -10  -8    5.97    0.30
   4  10   8    4.99    0.30
   2 -11  -8    8.22    0.32
  -2  11   8    8.12    0.48
   1 -11  -8    7.64    0.29
  -1  11   8    7.22    0.42
   0 -11  -8    1.62    0.15
   0  11   8    1.66    0.23
  -1 -11  -8   -0.01    0.06
   1  11   8    0.08    0.09
  -2 -11  -8    0.26    0.08
   2  11   8    0.25    0.10
   2  11   8    0.07    0.07
  -3 -11  -8    0.03    0.07
   3  11   8    0.17    0.09
  -4 -11  -8    2.08    0.21
   4  11   8    2.21    0.24
   2 -12  -8    0.82    0.13
  -2  12   8    0.94    0.24
   1 -12  -8    1.85    0.18
  -1  12   8    1.80    0.27
   0 -12  -8    0.44    0.10
   0  12   8    0.51    0.15
  -1 -12  -8    1.35    0.16
   1  12   8    0.95    0.18
  -2 -12  -8   -0.01    0.06
   2  12   8   -0.02    0.06
  -3 -12  -8   -0.03    0.07
   3  12   8    0.12    0.08
   1 -13  -8    1.29    0.15
  -1  13   8    1.21    0.24
   0 -13  -8    0.43    0.11
   0  13   8    0.10    0.12
  -1 -13  -8    2.54    0.19
   1  13   8    3.15    0.33
  -2 -13  -8   -0.02    0.06
  -3 -13  -8    1.40    0.18
   3  13   8    1.33    0.19
   0 -14  -8    0.47    0.12
   0  14   8    0.23    0.14
  -1 -14  -8    0.47    0.11
   1  14   8    0.85    0.20
  -2 -14  -8    0.92    0.22
   3  14   8    1.69    0.27
   1   8  -9    0.09    0.09
   0   8  -9    3.12    0.40
   0   8  -9    2.76    0.25
   0  -8   9    2.05    0.23
   2   7  -9    0.31    0.11
  -2  -7   9    0.31    0.13
   1   7  -9    9.89    0.40
  -1  -7   9    9.67    0.42
   0   7  -9    2.04    0.21
   0   7  -9    1.65    0.29
   0  -7   9    1.75    0.21
  -1   7  -9    1.01    0.25
   1  -7   9    1.40    0.19
   2  -7   9    0.80    0.17
  -3  -6   9    2.53    0.28
   2   6  -9    0.52    0.12
  -2  -6   9    0.45    0.14
   1   6  -9    0.38    0.11
  -1  -6   9    0.13    0.15
  -1  -6   9    0.29    0.11
   0   6  -9    0.16    0.09
   0   6  -9    0.27    0.15
   0  -6   9    0.27    0.11
  -1   6  -9    0.41    0.11
  -1   6  -9    0.27    0.15
   1  -6   9    0.17    0.10
  -2   6  -9    1.92    0.32
   2  -6   9    1.98    0.22
   3   5  -9    6.16    0.31
  -3  -5   9    6.31    0.36
   2   5  -9    0.09    0.07
  -2  -5   9    0.10    0.10
   1   5  -9    0.11    0.08
  -1  -5   9    0.14    0.09
  -1  -5   9    0.16    0.11
   0   5  -9    0.05    0.06
   0  -5   9    0.11    0.09
  -1   5  -9   -0.03    0.06
  -1   5  -9    0.03    0.12
   1  -5   9    0.08    0.07
  -2   5  -9    0.90    0.23
   2  -5   9    0.80    0.14
  -3   5  -9    0.80    0.24
   3  -5   9    0.58    0.13
   4   4  -9    0.48    0.13
   3   4  -9    0.23    0.09
  -3  -4   9    0.18    0.11
   2   4  -9    4.57    0.25
  -2  -4   9    3.92    0.26
   1   4  -9    1.58    0.17
  -1  -4   9    1.94    0.20
  -1  -4   9    1.34    0.20
   0   4  -9    2.44    0.19
   0  -4   9    2.16    0.24
   0  -4   9    2.73    0.20
  -1   4  -9   11.06    0.56
  -1   4  -9   12.08    0.41
   1  -4   9   11.27    0.39
  -2   4  -9   11.25    0.60
  -2   4  -9   11.91    0.43
   2  -4   9   11.63    0.40
  -3   4  -9    0.07    0.14
   3  -4   9    0.13    0.08
   4   3  -9   13.51    0.46
  -4  -3   9   13.28    0.56
   3   3  -9    3.93    0.23
  -3  -3   9    3.87    0.28
   2   3  -9    1.70    0.17
  -2  -3   9    1.86    0.21
   1   3  -9   18.24    0.51
  -1  -3   9   18.64    0.53
  -1  -3   9   18.66    0.60
   0   3  -9   12.31    0.40
   0  -3   9   11.79    0.49
   0  -3   9   12.65    0.40
  -1   3  -9    0.29    0.09
   1  -3   9    0.41    0.10
  -2   3  -9    0.91    0.14
  -2   3  -9    0.83    0.21
   2  -3   9    0.89    0.12
  -3   3  -9    0.94    0.23
  -4   3  -9    0.45    0.19
   4   2  -9    0.72    0.12
  -4  -2   9    0.75    0.17
   3   2  -9    1.55    0.17
  -3  -2   9    1.65    0.21
   2   2  -9   31.09    0.71
  -2  -2   9   29.56    0.74
   1   2  -9    0.08    0.06
  -1  -2   9    0.06    0.08
  -1  -2   9    0.00    0.06
   0   2  -9    0.13    0.07
   0  -2   9    0.21    0.11
   0  -2   9    0.17    0.07
  -1   2  -9    2.12    0.17
   1  -2   9    1.63    0.14
   1  -2   9    1.63    0.21
  -2   2  -9    0.15    0.08
   2  -2   9    0.09    0.06
  -3   2  -9    0.11    0.13
  -3   2  -9    0.08    0.08
  -4  -1   9    0.44    0.14
   3   1  -9    4.79    0.24
  -3  -1   9    4.16    0.28
   2   1  -9    0.71    0.11
  -2  -1   9    0.68    0.13
  -2  -1   9    0.69    0.13
   1   1  -9   15.17    0.44
  -1  -1   9   14.51    0.50
  -1  -1   9   15.52    0.44
   0   1  -9    0.56    0.10
   0  -1   9    0.31    0.08
   0  -1   9    0.22    0.10
  -1   1  -9    2.27    0.18
   1  -1   9    2.19    0.14
   1  -1   9    2.05    0.25
  -2   1  -9    2.93    0.21
   2  -1   9    2.73    0.29
  -3   1  -9    0.25    0.10
   3  -1   9    0.24    0.12
   4  -1   9    5.53    0.37
  -4   0   9    0.90    0.18
   3   0  -9    2.09    0.17
  -3   0   9    2.10    0.22
   2   0  -9   18.00    0.48
  -2   0   9   17.03    0.50
  -2   0   9   17.66    0.54
   1   0  -9    1.30    0.15
  -1   0   9    1.36    0.18
  -1   0   9    1.29    0.14
   0   0  -9    1.71    0.17
   0   0   9    1.96    0.22
   0   0   9    1.76    0.13
  -1   0  -9    3.20    0.20
   1   0   9    3.41    0.25
  -2   0  -9    1.72    0.18
   2   0   9    1.96    0.24
  -3   0  -9    3.24    0.24
   3   0   9    3.07    0.27
   4   0   9    0.38    0.14
  -4   1   9    4.95    0.32
   3  -1  -9    0.95    0.13
  -3   1   9    0.90    0.16
   2  -1  -9    2.28    0.16
  -2   1   9    2.03    0.21
  -2   1   9    2.08    0.17
   1  -1  -9    0.92    0.12
  -1   1   9    0.70    0.10
  -1   1   9    0.86    0.14
   0  -1  -9   10.14    0.34
   0   1   9    9.56    0.39
  -1  -1  -9   22.36    0.57
   1   1   9   22.72    0.66
  -2  -1  -9    6.73    0.31
   2   1   9    6.94    0.36
  -3  -1  -9    1.93    0.21
   3   1   9    2.81    0.29
  -4  -1  -9    0.36    0.13
   4   1   9    0.58    0.16
   4  -2  -9    2.81    0.18
  -4   2   9    2.27    0.25
   3  -2  -9   13.87    0.37
  -3   2   9   14.10    0.48
   2  -2  -9   17.24    0.39
   2  -2  -9   17.03    0.45
  -2   2   9   17.46    0.54
  -2   2   9   16.57    0.47
   1  -2  -9    1.72    0.10
   1  -2  -9    1.91    0.15
  -1   2   9    2.03    0.21
   0  -2  -9   18.45    0.49
   0   2   9   19.35    0.57
  -1  -2  -9   29.56    0.68
   1   2   9   29.88    0.76
  -2  -2  -9    2.38    0.19
   2   2   9    2.55    0.25
  -3  -2  -9    0.42    0.12
   3   2   9    0.42    0.14
  -4  -2  -9   12.11    0.49
   4  -3  -9    3.72    0.21
  -4   3   9    3.59    0.27
   3  -3  -9    8.46    0.28
  -3   3   9    8.52    0.36
   2  -3  -9   26.25    0.59
   2  -3  -9   26.63    0.53
  -2   3   9   25.44    0.68
   1  -3  -9    0.22    0.05
   1  -3  -9    0.18    0.06
  -1   3   9    0.43    0.11
   0  -3  -9   19.59    0.40
   0  -3  -9   19.27    0.50
   0   3   9   19.63    0.58
  -1  -3  -9    1.52    0.16
  -1  -3  -9    1.31    0.09
   1   3   9    1.24    0.17
  -2  -3  -9   14.11    0.35
  -2  -3  -9   13.49    0.45
   2   3   9   14.10    0.49
  -3  -3  -9    2.88    0.23
  -3  -3  -9    3.52    0.18
   3   3   9    3.67    0.26
  -4  -3  -9    5.12    0.33
   5   3   9    0.24    0.10
   4  -4  -9    0.04    0.06
  -4   4   9    0.01    0.08
   3  -4  -9    7.55    0.27
   2  -4  -9    0.47    0.07
  -2   4   9    0.35    0.11
   1  -4  -9    0.40    0.06
   1  -4  -9    0.43    0.09
  -1   4   9    0.26    0.10
   0  -4  -9    7.89    0.29
   0  -4  -9    7.35    0.22
   0   4   9    7.05    0.33
  -1  -4  -9    0.84    0.09
  -1  -4  -9    0.76    0.12
   1   4   9    0.47    0.11
  -2  -4  -9    0.36    0.10
  -2  -4  -9    0.31    0.07
   2   4   9    0.20    0.09
  -3  -4  -9    0.25    0.07
  -3  -4  -9    0.28    0.10
   3   4   9    0.27    0.10
  -4  -4  -9    2.38    0.21
  -5  -4  -9    0.59    0.13
   5   4   9    0.38    0.11
   4  -5  -9    0.09    0.07
   3  -5  -9    0.62    0.10
  -3   5   9    0.70    0.16
   2  -5  -9    1.24    0.12
  -2   5   9    1.31    0.19
   1  -5  -9   -0.01    0.03
   1  -5  -9    0.03    0.05
  -1   5   9    0.12    0.08
   0  -5  -9    2.48    0.17
   0  -5  -9    2.41    0.13
   0   5   9    2.41    0.20
  -1  -5  -9    4.68    0.25
  -1  -5  -9    4.66    0.18
   1   5   9    5.15    0.28
  -2  -5  -9    0.91    0.15
  -2  -5  -9    0.88    0.11
   2   5   9    0.82    0.15
  -3  -5  -9    0.07    0.06
  -3  -5  -9    0.05    0.08
   3   5   9   -0.13    0.05
  -4  -5  -9    0.08    0.07
   4   5   9    0.08    0.08
  -5  -5  -9    0.33    0.10
   5   5   9    0.17    0.09
   4  -6  -9    2.70    0.19
   3  -6  -9    0.02    0.05
  -3   6   9    0.15    0.10
   2  -6  -9    3.65    0.18
  -2   6   9    3.84    0.27
   1  -6  -9    1.34    0.12
   1  -6  -9    1.29    0.15
  -1   6   9    1.24    0.17
   0  -6  -9    2.20    0.13
   0  -6  -9    2.21    0.17
   0   6   9    1.68    0.19
  -1  -6  -9    0.27    0.06
  -1  -6  -9    0.32    0.09
   1   6   9    0.17    0.08
  -2  -6  -9    0.07    0.05
  -2  -6  -9    0.01    0.07
   2   6   9    0.11    0.08
  -3  -6  -9    5.42    0.32
  -3  -6  -9    5.21    0.24
   3   6   9    4.87    0.28
  -4  -6  -9    0.30    0.09
   4   6   9    0.45    0.12
  -5  -6  -9    4.06    0.26
   5   6   9    4.64    0.29
   3  -7  -9    0.30    0.08
  -3   7   9    0.44    0.14
   2  -7  -9   10.08    0.32
  -2   7   9   10.58    0.47
   1  -7  -9    9.12    0.29
  -1   7   9    8.75    0.40
   0  -7  -9   28.35    0.59
   0  -7  -9   29.32    0.67
   0   7   9   29.40    0.77
  -1  -7  -9    7.19    0.31
  -1  -7  -9    6.76    0.24
   1   7   9    7.16    0.34
  -2  -7  -9    3.63    0.26
  -2  -7  -9    3.94    0.20
   2   7   9    3.42    0.24
  -3  -7  -9    3.76    0.21
   3   7   9    3.46    0.26
   3   7   9    3.46    0.23
  -4  -7  -9    1.02    0.14
   4   7   9    0.81    0.14
  -5  -7  -9    0.13    0.09
   5   7   9    0.07    0.09
   3  -8  -9    3.24    0.20
  -3   8   9    3.74    0.31
   2  -8  -9    0.80    0.11
  -2   8   9    0.83    0.18
   1  -8  -9   27.73    0.59
  -1   8   9   26.33    0.77
   0  -8  -9    7.10    0.25
   0  -8  -9    6.96    0.29
   0   8   9    6.57    0.35
  -1  -8  -9    4.00    0.19
  -1  -8  -9    3.70    0.24
   1   8   9    3.45    0.25
  -2  -8  -9    3.56    0.20
   2   8   9    3.68    0.22
   2   8   9    3.10    0.23
  -3  -8  -9    0.28    0.08
   3   8   9    0.26    0.09
  -4  -8  -9    1.66    0.19
   4   8   9    1.20    0.18
   3  -9  -9    0.18    0.07
  -3   9   9    0.21    0.12
   2  -9  -9    3.17    0.19
  -2   9   9    2.73    0.30
   1  -9  -9    1.00    0.12
  -1   9   9    0.96    0.19
   0  -9  -9    7.27    0.27
   0   9   9    7.51    0.38
  -1  -9  -9   -0.07    0.04
   1   9   9   -0.08    0.07
   1   9   9   -0.03    0.05
  -2  -9  -9    3.38    0.20
   2   9   9    3.08    0.20
   2   9   9    3.01    0.24
  -3  -9  -9    1.00    0.14
   3   9   9    0.71    0.13
  -4  -9  -9    0.05    0.07
   4   9   9    0.29    0.11
  -3  10   9    0.38    0.16
   2 -10  -9    0.23    0.08
  -2  10   9    0.46    0.14
   1 -10  -9    0.14    0.06
  -1  10   9    0.06    0.10
   0 -10  -9    0.31    0.08
   0  10   9    0.21    0.12
  -1 -10  -9    4.62    0.23
   1  10   9    4.33    0.30
   1  10   9    4.80    0.23
  -2 -10  -9    0.37    0.09
   2  10   9    0.45    0.13
   2  10   9    0.30    0.09
  -3 -10  -9    0.60    0.12
   3  10   9    0.50    0.12
  -4 -10  -9    1.65    0.19
   4  10   9    1.52    0.20
   2 -11  -9    0.03    0.06
  -2  11   9    0.04    0.11
   1 -11  -9    6.81    0.28
  -1  11   9    6.21    0.40
   0 -11  -9    0.40    0.09
   0  11   9    0.46    0.15
  -1 -11  -9    6.16    0.27
   1  11   9    6.05    0.37
  -2 -11  -9   19.02    0.52
   2  11   9   18.07    0.62
   2  11   9   18.30    0.54
  -3 -11  -9    2.04    0.21
   3  11   9    1.88    0.21
   4  11   9    5.37    0.41
   1 -12  -9    1.63    0.17
  -1  12   9    2.02    0.28
   0 -12  -9    2.55    0.19
   0  12   9    2.84    0.31
  -1 -12  -9    0.13    0.08
   1  12   9    0.07    0.10
  -2 -12  -9    0.25    0.08
   2  12   9    0.44    0.11
  -3 -12  -9    0.71    0.14
   3  12   9    0.72    0.14
   0 -13  -9    0.39    0.10
   0  13   9    0.38    0.16
  -1 -13  -9    1.34    0.17
   1  13   9    1.35    0.22
  -2 -13  -9    0.31    0.10
   3  13   9    1.04    0.17
   1  14   9    0.02    0.10
  -1  -7  10    0.05    0.12
   0   7 -10    1.33    0.18
   0  -7  10    1.16    0.19
  -2  -6  10    0.28    0.13
   1   6 -10    5.57    0.30
  -1  -6  10    4.99    0.31
   0   6 -10   20.45    0.60
   0  -6  10   19.65    0.61
   0  -6  10   19.27    0.72
  -1   6 -10    1.75    0.31
  -1   6 -10    1.64    0.20
   1  -6  10    1.11    0.18
   2  -6  10    1.17    0.18
   2   5 -10    1.69    0.20
  -2  -5  10    1.86    0.22
   1   5 -10    1.06    0.16
  -1  -5  10    1.11    0.19
  -1  -5  10    0.85    0.16
   0   5 -10    2.59    0.21
   0  -5  10    2.38    0.23
   0  -5  10    2.55    0.29
  -1   5 -10    0.03    0.12
  -1   5 -10    0.06    0.08
   1  -5  10    0.11    0.09
  -2   5 -10   -0.08    0.12
   2  -5  10   -0.04    0.07
   3   4 -10    0.11    0.08
  -3  -4  10    0.03    0.11
   2   4 -10    4.66    0.27
  -2  -4  10    4.26    0.28
   1   4 -10    0.03    0.06
  -1  -4  10   -0.02    0.08
  -1  -4  10    0.08    0.08
   0   4 -10    5.85    0.30
   0  -4  10    5.59    0.29
   0  -4  10    5.09    0.36
  -1   4 -10    0.68    0.13
   1  -4  10    0.91    0.14
  -2   4 -10    2.90    0.38
  -2   4 -10    2.97    0.23
   3   3 -10    1.51    0.19
  -3  -3  10    1.46    0.20
   2   3 -10    7.37    0.33
  -2  -3  10    7.52    0.36
   1   3 -10   33.36    0.79
  -1  -3  10   33.80    0.81
  -1  -3  10   34.85    0.91
   0   3 -10    8.13    0.34
   0  -3  10    7.56    0.32
   0  -3  10    6.92    0.40
  -1   3 -10    0.17    0.09
   1  -3  10    0.27    0.09
   1  -3  10    0.27    0.12
  -2   3 -10   11.92    0.44
   4   2 -10    0.04    0.07
  -4  -2  10    0.01    0.10
   3   2 -10    0.02    0.06
  -3  -2  10    0.02    0.10
   2   2 -10    0.47    0.11
  -2  -2  10    0.38    0.12
   1   2 -10   37.79    0.84
  -1  -2  10   38.60    0.95
  -1  -2  10   37.74    0.85
   0   2 -10    0.87    0.13
   0  -2  10    0.88    0.17
   0  -2  10    0.64    0.11
  -1   2 -10    0.69    0.13
   1  -2  10    0.51    0.16
  -2   2 -10    5.35    0.29
   2  -2  10    5.95    0.38
  -3   2 -10    0.20    0.10
   3  -2  10    0.09    0.11
   4  -2  10    0.02    0.12
  -4  -1  10   14.29    0.58
   3   1 -10    1.62    0.18
  -3  -1  10    1.79    0.22
   2   1 -10    2.15    0.18
  -2  -1  10    2.50    0.23
   1   1 -10   28.26    0.68
  -1  -1  10   29.12    0.78
  -1  -1  10   28.08    0.68
   0   1 -10    5.42    0.27
   0  -1  10    5.18    0.32
  -1   1 -10    0.44    0.11
   1  -1  10    0.66    0.16
  -2   1 -10    6.60    0.32
   2  -1  10    6.02    0.38
  -3   1 -10    0.84    0.16
   3  -1  10    0.49    0.16
   4  -1  10    1.15    0.23
  -4   0  10    6.55    0.38
   3   0 -10    0.62    0.12
  -3   0  10    0.50    0.13
   2   0 -10    6.85    0.30
  -2   0  10    7.27    0.35
  -2   0  10    7.69    0.33
   1   0 -10    1.66    0.17
  -1   0  10    1.64    0.20
   0   0 -10    0.83    0.13
   0   0  10    1.14    0.18
  -1   0 -10    1.04    0.15
   1   0  10    1.31    0.21
  -2   0 -10    0.50    0.12
   2   0  10    0.77    0.16
  -3   0 -10   -0.07    0.07
   3   0  10    0.05    0.11
   4   0  10    6.89    0.43
  -4   1  10    0.86    0.18
   3  -1 -10    7.31    0.30
  -3   1  10    6.62    0.35
   2  -1 -10    4.01    0.22
  -2   1  10    3.96    0.27
   1  -1 -10   10.10    0.36
  -1   1  10   10.30    0.42
   0  -1 -10   23.20    0.59
   0   1  10   22.58    0.68
  -1  -1 -10    8.75    0.35
   1   1  10    8.87    0.42
  -2  -1 -10    0.05    0.08
   2   1  10   -0.03    0.08
  -3  -1 -10    1.93    0.23
   3   1  10    1.42    0.22
  -4  -1 -10   66.06    1.40
   4   1  10   64.84    1.46
  -4   2  10    7.50    0.39
   2  -2 -10   12.09    0.39
  -2   2  10   12.70    0.47
   1  -2 -10    5.55    0.25
  -1   2  10    5.41    0.31
   0  -2 -10   35.47    0.78
   0   2  10   35.58    0.88
  -1  -2 -10    1.89    0.19
   1   2  10    1.99    0.23
  -2  -2 -10    0.20    0.08
   2   2  10   -0.03    0.08
  -3  -2 -10    1.34    0.19
   3   2  10    1.59    0.22
  -4  -2 -10    3.25    0.31
   4   2  10    3.79    0.50
   4  -3 -10    8.14    0.34
   3  -3 -10    5.61    0.23
   2  -3 -10   10.60    0.31
   2  -3 -10   10.55    0.35
  -2   3  10   10.29    0.43
   1  -3 -10    6.60    0.28
  -1   3  10    6.18    0.33
   0  -3 -10   14.52    0.45
   0   3  10   15.24    0.52
  -1  -3 -10   27.86    0.69
   1   3  10   28.34    0.76
  -2  -3 -10    0.47    0.12
   2   3  10    0.44    0.13
  -3  -3 -10    4.67    0.30
   3   3  10    5.10    0.32
  -4  -3 -10    0.33    0.13
   5   3  10    0.01    0.07
   4  -4 -10   15.48    0.45
   3  -4 -10   22.97    0.54
   2  -4 -10    3.02    0.16
  -2   4  10    3.11    0.25
   1  -4 -10    7.38    0.23
   1  -4 -10    6.92    0.29
  -1   4  10    6.76    0.34
   0  -4 -10    1.11    0.14
   0  -4 -10    1.20    0.09
   0   4  10    1.38    0.19
  -1  -4 -10   18.80    0.41
  -1  -4 -10   17.44    0.52
   1   4  10   17.93    0.58
  -2  -4 -10    0.65    0.12
  -2  -4 -10    0.88    0.11
   2   4  10    0.78    0.15
  -3  -4 -10    1.62    0.17
  -3  -4 -10    1.55    0.20
   3   4  10    1.40    0.20
  -4  -4 -10    0.27    0.12
   5   4  10    0.02    0.08
   4  -5 -10    0.55    0.11
   3  -5 -10   -0.07    0.05
   2  -5 -10    0.81    0.10
  -2   5  10    0.61    0.14
   1  -5 -10    4.36    0.18
   1  -5 -10    4.51    0.23
  -1   5  10    4.28    0.28
   0  -5 -10    3.28    0.15
   0  -5 -10    3.36    0.21
   0   5  10    3.11    0.24
  -1  -5 -10    0.37    0.10
  -1  -5 -10    0.32    0.07
   1   5  10    0.19    0.09
  -2  -5 -10    0.00    0.07
  -2  -5 -10   -0.03    0.04
   2   5  10    0.07    0.08
  -3  -5 -10   10.18    0.45
  -3  -5 -10   11.29    0.36
   3   5  10   10.67    0.45
  -4  -5 -10    0.08    0.07
   4   5  10    0.22    0.09
  -5  -5 -10    0.64    0.13
   5   5  10    0.59    0.20
   3  -6 -10    0.10    0.06
  -3   6  10    0.03    0.09
   2  -6 -10    2.43    0.15
  -2   6  10    2.25    0.25
   1  -6 -10    0.03    0.04
  -1   6  10   -0.05    0.07
   0  -6 -10   25.41    0.53
   0  -6 -10   25.74    0.64
   0   6  10   25.43    0.72
  -1  -6 -10    0.07    0.08
  -1  -6 -10    0.26    0.07
   1   6  10    0.08    0.08
  -2  -6 -10   -0.01    0.06
  -2  -6 -10   -0.01    0.05
   2   6  10    0.03    0.07
  -3  -6 -10    6.32    0.36
  -3  -6 -10    5.87    0.26
   3   6  10    6.16    0.34
  -4  -6 -10    0.50    0.11
   4   6  10    0.50    0.12
  -5  -6 -10    4.29    0.27
   3  -7 -10    0.41    0.09
  -3   7  10    0.41    0.14
   2  -7 -10   -0.04    0.04
  -2   7  10    0.07    0.09
   1  -7 -10    0.56    0.09
  -1   7  10    0.75    0.16
   0  -7 -10   26.12    0.65
   0  -7 -10   26.34    0.56
   0   7  10   25.45    0.73
  -1  -7 -10    0.64    0.10
  -1  -7 -10    0.57    0.12
   1   7  10    0.50    0.13
  -2  -7 -10    0.15    0.09
  -2  -7 -10    0.07    0.05
   2   7  10    0.12    0.09
  -3  -7 -10    0.82    0.13
   3   7  10    0.70    0.15
  -4  -7 -10    1.58    0.18
   4   7  10    1.74    0.22
   3  -8 -10   -0.06    0.05
  -3   8  10    0.08    0.10
   2  -8 -10    0.48    0.09
  -2   8  10    0.36    0.14
   1  -8 -10    0.67    0.10
  -1   8  10    0.84    0.16
   0  -8 -10   20.83    0.57
   0  -8 -10   21.25    0.50
   0   8  10   20.85    0.67
  -1  -8 -10    1.89    0.21
  -1  -8 -10    1.88    0.14
   1   8  10    1.62    0.21
  -2  -8 -10    6.44    0.27
  -2  -8 -10    6.94    0.36
   2   8  10    6.47    0.34
  -3  -8 -10   11.49    0.39
   3   8  10   11.76    0.44
  -4  -8 -10    3.18    0.22
   4   8  10    3.33    0.25
  -3   9  10    0.61    0.17
   2  -9 -10    1.38    0.15
  -2   9  10    1.53    0.25
   1  -9 -10    9.67    0.32
  -1   9  10    9.79    0.47
   0  -9 -10    9.55    0.32
   0   9  10   10.36    0.46
  -1  -9 -10   20.33    0.62
  -1  -9 -10   21.34    0.52
   1   9  10   20.15    0.66
  -2  -9 -10    0.07    0.07
   2   9  10    0.12    0.07
   2   9  10   -0.01    0.09
  -3  -9 -10    9.23    0.36
   3   9  10    9.24    0.39
  -4  -9 -10    0.54    0.13
   4   9  10    0.35    0.12
   2 -10 -10    1.34    0.15
  -2  10  10    1.59    0.25
   1 -10 -10    0.17    0.07
  -1  10  10    0.20    0.12
   0 -10 -10    2.30    0.16
   0  10  10    2.28    0.26
  -1 -10 -10    1.04    0.13
   1  10  10    1.43    0.16
   1  10  10    1.38    0.21
  -2 -10 -10    4.52    0.24
   2  10  10    4.44    0.25
   2  10  10    3.93    0.29
  -3 -10 -10    0.27    0.09
   3  10  10    0.04    0.08
  -4 -10 -10    0.23    0.11
   4  10  10    0.44    0.20
  -2  11  10    0.09    0.14
   1 -11 -10    4.17    0.22
  -1  11  10    3.38    0.35
   0 -11 -10    4.76    0.24
   0  11  10    4.72    0.35
  -1 -11 -10    6.61    0.29
   1  11  10    7.04    0.41
  -2 -11 -10    0.18    0.08
   2  11  10    0.13    0.11
   2  11  10    0.12    0.08
  -3 -11 -10    2.43    0.22
   3  11  10    2.70    0.25
   1 -12 -10   -0.03    0.06
  -1  12  10    0.10    0.12
   0 -12 -10    0.08    0.07
   0  12  10    0.01    0.10
  -1 -12 -10    2.51    0.22
   1  12  10    2.63    0.30
  -2 -12 -10    6.41    0.30
   2  12  10    5.76    0.30
   2  12  10    4.96    0.35
  -3 -12 -10    0.04    0.11
   3  12  10    0.00    0.07
   0  13  10    0.94    0.21
  -1 -13 -10    2.49    0.23
   1  13  10    2.34    0.29
  -1  -6  11    2.07    0.27
   0  -6  11    0.39    0.16
   0  -6  11    0.26    0.12
  -1   6 -11    0.31    0.15
   1  -6  11    0.25    0.13
  -2  -5  11    5.10    0.34
   1   5 -11    0.02    0.08
  -1  -5  11    0.09    0.10
   0   5 -11    6.65    0.34
   0  -5  11    5.75    0.33
   0  -5  11    5.92    0.41
  -1   5 -11    1.21    0.18
   1  -5  11    1.26    0.24
   2   4 -11    0.29    0.11
  -2  -4  11    0.26    0.12
   1   4 -11    1.17    0.18
  -1  -4  11    0.79    0.18
  -1  -4  11    1.05    0.18
   0   4 -11    0.21    0.09
   0  -4  11    0.07    0.09
   0  -4  11    0.20    0.13
  -1   4 -11    0.92    0.16
   1  -4  11    0.88    0.21
  -2   4 -11    1.86    0.22
   2  -4  11    1.26    0.28
  -3  -3  11    1.92    0.24
   2   3 -11    3.11    0.23
  -2  -3  11    3.58    0.27
   1   3 -11    0.37    0.12
  -1  -3  11    0.26    0.11
  -1  -3  11    0.42    0.15
   0   3 -11    2.39    0.23
   0  -3  11    2.29    0.29
  -1   3 -11    6.56    0.34
   1  -3  11    5.96    0.41
  -2   3 -11    0.39    0.12
   2  -3  11    0.20    0.13
   3   2 -11    3.84    0.26
  -3  -2  11    3.71    0.29
   2   2 -11    2.61    0.21
  -2  -2  11    2.42    0.25
  -1  -2  11    1.64    0.22
   0   2 -11    3.77    0.25
   0  -2  11    3.83    0.31
  -1   2 -11    0.38    0.11
   1  -2  11    0.31    0.14
  -2   2 -11    0.03    0.08
   2  -2  11   -0.01    0.10
  -3   2 -11    0.28    0.13
   3  -2  11    0.25    0.14
   3   1 -11    0.31    0.10
  -3  -1  11    0.32    0.13
   2   1 -11    3.84    0.24
   1   1 -11   34.08    0.80
  -1  -1  11   32.16    0.89
   0   1 -11    2.46    0.20
   0  -1  11    3.10    0.31
  -1   1 -11    1.46    0.19
   1  -1  11    1.11    0.20
  -2   1 -11   -0.02    0.07
   2  -1  11   -0.09    0.08
  -3   1 -11    1.74    0.23
   3  -1  11    2.13    0.30
  -4   0  11    9.78    0.49
   3   0 -11    0.27    0.10
   2   0 -11    2.23    0.21
   1   0 -11   29.23    0.73
  -1   0  11   29.75    0.82
   0   0 -11    0.02    0.07
   0   0  11   -0.11    0.06
  -1   0 -11    0.13    0.09
   1   0  11    0.37    0.14
  -2   0 -11    0.07    0.09
   2   0  11   -0.06    0.09
  -3   0 -11    0.49    0.14
   3   0  11    0.50    0.15
   4   0  11    0.23    0.14
   3  -1 -11    6.17    0.30
   2  -1 -11    1.90    0.19
  -2   1  11    2.07    0.24
   1  -1 -11    1.22    0.15
  -1   1  11    1.79    0.23
   0  -1 -11   -0.04    0.05
   0   1  11    0.06    0.09
  -1  -1 -11    2.57    0.21
   1   1  11    2.47    0.28
  -2  -1 -11    0.03    0.08
   2   1  11   -0.14    0.07
  -3  -1 -11    0.60    0.14
   3   1  11    1.01    0.20
  -4  -1 -11   10.81    0.49
   4   1  11   11.18    0.54
   2  -2 -11    0.12    0.07
  -2   2  11    0.00    0.08
   1  -2 -11    6.11    0.29
  -1   2  11    6.26    0.35
   0  -2 -11    0.35    0.11
   0   2  11    0.27    0.12
  -1  -2 -11   24.16    0.66
   1   2  11   24.37    0.74
  -2  -2 -11    5.28    0.31
   2   2  11    5.44    0.35
  -3  -2 -11    0.81    0.16
   3   2  11    0.60    0.16
  -4  -2 -11    4.90    0.34
   4   2  11    4.81    0.36
   2  -3 -11   11.99    0.40
  -2   3  11   11.98    0.49
   1  -3 -11   17.22    0.50
  -1   3  11   17.44    0.59
   0  -3 -11    0.91    0.14
   0   3  11    0.81    0.17
  -1  -3 -11   15.94    0.51
   1   3  11   16.07    0.58
  -2  -3 -11    0.17    0.09
   2   3  11    0.08    0.09
  -3  -3 -11    2.79    0.27
   3   3  11    3.41    0.29
  -4  -3 -11    4.57    0.34
  -2   4  11    1.46    0.20
   1  -4 -11    0.23    0.09
  -1   4  11    0.46    0.14
   0  -4 -11    1.13    0.16
   0   4  11    0.73    0.15
  -1  -4 -11    3.51    0.24
   1   4  11    3.88    0.29
  -2  -4 -11    0.07    0.08
   2   4  11    0.04    0.08
  -3  -4 -11    0.01    0.08
   3   4  11   -0.07    0.07
  -4  -4 -11   -0.08    0.09
   3  -5 -11    0.02    0.05
   2  -5 -11    3.24    0.17
  -2   5  11    3.15    0.31
   1  -5 -11    0.96    0.14
   1  -5 -11    1.18    0.11
  -1   5  11    1.36    0.20
   0  -5 -11    0.68    0.09
   0  -5 -11    0.46    0.11
   0   5  11    0.70    0.15
  -1  -5 -11    0.31    0.07
  -1  -5 -11    0.34    0.10
   1   5  11    0.50    0.14
  -2  -5 -11    4.65    0.24
  -2  -5 -11    4.46    0.29
   2   5  11    3.88    0.29
  -3  -5 -11   -0.02    0.09
   3   5  11    0.02    0.10
   3  -6 -11    1.07    0.13
  -3   6  11    0.86    0.28
   2  -6 -11    0.75    0.10
  -2   6  11    0.82    0.17
   1  -6 -11    6.22    0.23
  -1   6  11    5.87    0.35
   0  -6 -11    3.41    0.23
   0  -6 -11    3.80    0.18
   0   6  11    3.11    0.26
  -1  -6 -11    6.04    0.23
  -1  -6 -11    6.25    0.32
   1   6  11    6.65    0.36
  -2  -6 -11    0.23    0.11
  -2  -6 -11    0.22    0.07
   2   6  11    0.36    0.13
  -3  -6 -11    5.13    0.25
  -3  -6 -11    5.13    0.34
   3   6  11    4.99    0.33
  -4  -6 -11    1.12    0.15
   4   6  11    1.20    0.18
   3  -7 -11    0.19    0.08
  -3   7  11    0.21    0.13
   2  -7 -11    1.36    0.14
  -2   7  11    1.21    0.20
   1  -7 -11    3.29    0.17
  -1   7  11    2.60    0.28
   0  -7 -11   27.40    0.70
   0  -7 -11   26.99    0.58
   0   7  11   27.26    0.78
  -1  -7 -11    6.09    0.32
  -1  -7 -11    6.68    0.25
   1   7  11    6.47    0.36
  -2  -7 -11    1.63    0.16
  -2  -7 -11    1.78    0.22
   2   7  11    1.38    0.21
  -3  -7 -11    3.87    0.31
  -3  -7 -11    3.26    0.21
   3   7  11    3.38    0.28
  -4  -7 -11    0.73    0.14
   4   7  11    0.69    0.14
   3  -8 -11    5.01    0.29
  -3   8  11    5.62    0.39
   2  -8 -11    1.02    0.13
  -2   8  11    1.26    0.22
   1  -8 -11    1.87    0.14
  -1   8  11    1.77    0.24
   0  -8 -11   28.36    0.73
   0  -8 -11   28.61    0.62
   0   8  11   27.87    0.82
  -1  -8 -11    1.77    0.21
  -1  -8 -11    1.80    0.14
   1   8  11    1.62    0.21
  -2  -8 -11   -0.04    0.05
  -2  -8 -11    0.09    0.10
   2   8  11    0.00    0.08
  -3  -8 -11    1.43    0.17
   3   8  11    1.25    0.18
  -4  -8 -11    0.41    0.11
   4   8  11    0.50    0.13
   2  -9 -11    5.40    0.26
  -2   9  11    6.20    0.41
   1  -9 -11    1.41    0.15
  -1   9  11    1.22    0.21
   0  -9 -11    0.05    0.06
   0   9  11    0.08    0.10
  -1  -9 -11    0.71    0.11
  -1  -9 -11    0.97    0.17
   1   9  11    0.57    0.15
  -2  -9 -11    0.32    0.09
   2   9  11    0.39    0.13
  -3  -9 -11    2.40    0.22
   3   9  11    2.12    0.23
  -4  -9 -11    0.54    0.13
   2 -10 -11    0.10    0.08
  -2  10  11    0.02    0.11
   1 -10 -11    0.11    0.07
  -1  10  11    0.13    0.12
   0 -10 -11    2.21    0.17
   0  10  11    2.13    0.26
  -1 -10 -11   -0.01    0.05
   1  10  11    0.05    0.10
   1  10  11   -0.03    0.05
  -2 -10 -11    3.14    0.21
   2  10  11    3.17    0.28
   2  10  11    3.18    0.22
  -3 -10 -11    0.88    0.15
   3  10  11    0.84    0.15
   1 -11 -11    4.31    0.24
  -1  11  11    4.87    0.38
   0 -11 -11    4.08    0.23
   0  11  11    4.78    0.36
  -1 -11 -11    0.40    0.10
   1  11  11    0.31    0.13
  -2 -11 -11    5.97    0.29
   2  11  11    5.90    0.31
   2  11  11    5.37    0.35
  -3 -11 -11    2.96    0.23
   3  11  11    2.98    0.24
   0 -12 -11   -0.02    0.06
   0  12  11    0.05    0.11
  -1 -12 -11    1.02    0.15
   1  12  11    1.11    0.21
  -2 -12 -11    0.54    0.12
   2  12  11    0.53    0.16
   2  12  11    0.61    0.13
   1  13  11    0.62    0.18
  -2  -4  12    0.21    0.15
   0   4 -12    0.67    0.17
   0  -4  12    0.97    0.21
  -1   4 -12    1.35    0.23
   1   3 -12    2.30    0.24
  -1  -3  12    1.67    0.24
   0   3 -12   21.01    0.64
   0  -3  12   21.20    0.77
  -1   3 -12    0.87    0.17
   1  -3  12    0.97    0.22
  -2   3 -12    0.33    0.12
   2   2 -12    0.81    0.16
   1   2 -12    1.70    0.20
  -1  -2  12    1.25    0.22
   0   2 -12    9.31    0.40
   0  -2  12    9.09    0.49
  -1   2 -12   -0.04    0.07
   1  -2  12    0.01    0.10
  -2   2 -12    1.42    0.21
   2  -2  12    1.73    0.28
   3   1 -12    4.76    0.32
   2   1 -12    5.47    0.31
   1   1 -12    5.51    0.31
  -1  -1  12    6.21    0.37
   0   1 -12    0.14    0.10
   0  -1  12    0.08    0.10
  -1   1 -12    0.26    0.11
   1  -1  12    0.09    0.11
  -2   1 -12    0.06    0.09
   2  -1  12    0.17    0.13
  -3   1 -12    3.97    0.31
   3   0 -12    0.13    0.09
   2   0 -12    2.03    0.21
   1   0 -12    1.69    0.20
  -1   0  12    1.35    0.22
   0   0 -12   10.44    0.42
   0   0  12   10.54    0.50
  -1   0 -12    0.54    0.13
   1   0  12    0.58    0.17
  -2   0 -12    2.39    0.26
   2   0  12    1.94    0.28
  -3   0 -12    0.05    0.10
   3   0  12   -0.05    0.11
   2  -1 -12    0.18    0.09
   1  -1 -12    0.40    0.11
  -1   1  12    0.63    0.16
   0  -1 -12    2.90    0.27
   0   1  12    2.37    0.28
  -1  -1 -12    4.46    0.28
   1   1  12    4.36    0.33
  -2  -1 -12    3.17    0.29
   2   1  12    3.28    0.34
  -3  -1 -12    1.98    0.25
   3   1  12    1.86    0.27
   2  -2 -12    0.13    0.08
  -2   2  12    0.06    0.09
   1  -2 -12   12.25    0.44
  -1   2  12   11.00    0.50
   0  -2 -12    4.74    0.28
   0   2  12    4.97    0.33
  -1  -2 -12    9.77    0.41
   1   2  12    9.28    0.47
  -2  -2 -12    1.43    0.21
   2   2  12    1.13    0.20
  -3  -2 -12    0.30    0.13
   3   2  12    0.49    0.16
   4   2  12    1.00    0.21
   2  -3 -12   -0.03    0.07
  -2   3  12   -0.02    0.09
   1  -3 -12    0.69    0.13
  -1   3  12    0.59    0.15
   0  -3 -12    3.61    0.24
   0   3  12    3.65    0.29
  -1  -3 -12    1.78    0.21
   1   3  12    2.21    0.27
  -2  -3 -12    0.64    0.15
   2   3  12    0.54    0.16
  -3  -3 -12    0.07    0.11
   3   3  12    0.07    0.11
  -4  -3 -12    0.43    0.23
  -2   4  12    7.63    0.40
   1  -4 -12   15.65    0.51
  -1   4  12   17.88    0.62
   0  -4 -12    2.03    0.22
   0   4  12    1.70    0.22
  -1  -4 -12    3.08    0.24
   1   4  12    3.47    0.29
  -2  -4 -12    4.27    0.30
   2   4  12    5.28    0.35
  -3  -4 -12    4.94    0.34
   3   4  12    5.04    0.35
  -4  -4 -12    0.19    0.19
  -2   5  12    0.70    0.17
   1  -5 -12    0.23    0.09
  -1   5  12    0.25    0.12
   0  -5 -12    0.96    0.15
   0   5  12    0.78    0.17
  -1  -5 -12    0.29    0.11
   1   5  12    0.42    0.14
  -2  -5 -12    0.74    0.16
   2   5  12    0.67    0.16
  -3  -5 -12    0.78    0.17
   3   5  12    0.51    0.15
   3  -6 -12    0.77    0.12
   2  -6 -12    2.31    0.16
  -2   6  12    3.15    0.33
   1  -6 -12    1.82    0.13
  -1   6  12    1.74    0.23
   0  -6 -12    0.42    0.08
   0  -6 -12    0.33    0.11
   0   6  12    0.59    0.16
  -1  -6 -12    5.24    0.31
   1   6  12    5.14    0.34
  -2  -6 -12    2.54    0.27
   2   6  12    2.78    0.29
  -3  -6 -12    0.01    0.10
   3   6  12    0.22    0.12
   3  -7 -12    0.62    0.12
   2  -7 -12    0.02    0.05
  -2   7  12    0.00    0.09
   1  -7 -12    0.46    0.09
  -1   7  12    0.43    0.15
   0  -7 -12    0.35    0.11
   0  -7 -12    0.30    0.08
   0   7  12    0.14    0.11
  -1  -7 -12    0.72    0.15
  -1  -7 -12    0.42    0.09
   1   7  12    0.48    0.15
  -2  -7 -12    1.23    0.14
  -2  -7 -12    1.03    0.18
   2   7  12    0.89    0.18
  -3  -7 -12    0.21    0.09
  -3  -7 -12    0.25    0.13
   3   7  12    0.04    0.11
   2  -8 -12    0.55    0.10
  -2   8  12    0.57    0.17
   1  -8 -12    0.44    0.09
  -1   8  12    0.47    0.16
   0  -8 -12    2.20    0.16
   0   8  12    1.96    0.25
  -1  -8 -12   39.36    0.80
  -1  -8 -12   38.04    0.94
   1   8  12   39.78    1.02
  -2  -8 -12    0.94    0.13
  -2  -8 -12    0.78    0.16
   2   8  12    0.69    0.17
  -3  -8 -12    0.17    0.08
   3   8  12    0.13    0.12
  -4  -8 -12    3.19    0.23
   2  -9 -12   -0.04    0.05
  -2   9  12    0.03    0.11
   1  -9 -12   -0.02    0.05
  -1   9  12    0.02    0.10
   0  -9 -12    0.23    0.08
   0   9  12    0.47    0.15
  -1  -9 -12    3.42    0.20
  -1  -9 -12    3.27    0.30
   1   9  12    3.16    0.33
  -2  -9 -12    7.28    0.41
  -2  -9 -12    7.31    0.31
   2   9  12    7.47    0.41
  -3  -9 -12    0.94    0.15
   3   9  12    0.87    0.16
   1 -10 -12    8.29    0.32
  -1  10  12    8.44    0.48
   0 -10 -12    2.16    0.19
   0  10  12    2.12    0.28
  -1 -10 -12    2.10    0.20
   1  10  12    2.75    0.31
  -2 -10 -12    0.60    0.12
   2  10  12    0.64    0.13
   2  10  12    0.77    0.18
  -3 -10 -12    7.62    0.35
   3  10  12    8.17    0.39
   0 -11 -12    1.39    0.17
   0  11  12    1.95    0.28
  -1 -11 -12    0.73    0.13
   1  11  12    0.78    0.18
  -2 -11 -12    7.57    0.34
   2  11  12    7.84    0.44
   2  11  12    7.03    0.34
   1  12  12    0.48    0.17
   2  12  12    1.50    0.24
   2  12  12    1.12    0.22
  -1  -2  13    1.65    0.26
   0   2 -13    9.26    0.62
   0  -2  13    8.66    0.49
   1   1 -13    1.39    0.19
  -1  -1  13    1.16    0.22
   0   1 -13   35.25    0.90
   0  -1  13   34.30    1.02
  -1   1 -13    0.16    0.11
   1  -1  13    0.15    0.13
  -2   1 -13    0.74    0.26
   2   0 -13    0.94    0.17
   1   0 -13    0.58    0.14
  -1   0  13    0.28    0.14
   0   0 -13   10.62    0.45
   0   0  13    9.75    0.51
  -1   0 -13    2.05    0.24
   1   0  13    1.50    0.25
  -2   0 -13    4.78    0.33
   2   0  13    5.18    0.40
   2  -1 -13    0.57    0.14
   1  -1 -13    0.01    0.08
  -1   1  13   -0.11    0.08
   0  -1 -13    4.03    0.28
   0   1  13    3.83    0.33
  -1  -1 -13    0.67    0.15
   1   1  13    0.65    0.17
  -2  -1 -13    3.15    0.30
   2   1  13    2.37    0.30
   2  -2 -13    2.66    0.25
   1  -2 -13    8.94    0.40
  -1   2  13    8.75    0.46
   0  -2 -13    8.50    0.40
   0   2  13    8.29    0.46
  -1  -2 -13    0.02    0.09
   1   2  13    0.06    0.10
  -2  -2 -13    4.82    0.33
   2   2  13    4.18    0.35
  -3  -2 -13   -0.06    0.11
   3   2  13    0.01    0.11
   2  -3 -13    1.23    0.17
  -2   3  13    1.42    0.23
   1  -3 -13    6.51    0.34
  -1   3  13    6.20    0.39
   0  -3 -13    8.25    0.38
   0   3  13    7.02    0.42
  -1  -3 -13    0.05    0.09
   1   3  13    0.11    0.11
  -2  -3 -13    7.45    0.40
   2   3  13    8.29    0.46
  -3  -3 -13    0.15    0.12
   3   3  13    0.29    0.15
  -2   4  13    0.14    0.11
   1  -4 -13    0.93    0.16
  -1   4  13    0.71    0.17
   0  -4 -13    1.25    0.18
   0   4  13    0.75    0.17
  -1  -4 -13   -0.02    0.08
   1   4  13   -0.07    0.09
  -2  -4 -13    0.95    0.18
   2   4  13    1.05    0.21
  -3  -4 -13    0.05    0.11
   3   4  13   -0.09    0.09
  -2   5  13    1.37    0.23
   1  -5 -13    0.07    0.08
  -1   5  13    0.06    0.11
   0  -5 -13    2.27    0.24
   0   5  13    2.05    0.26
  -1  -5 -13    0.03    0.08
   1   5  13    0.21    0.12
  -2  -5 -13    3.86    0.30
   2   5  13    4.40    0.34
  -3  -5 -13    0.45    0.15
   3   5  13    0.75    0.18
  -2   6  13    0.79    0.19
  -1   6  13    2.07    0.27
   0  -6 -13    6.32    0.34
   0   6  13    6.08    0.39
  -1  -6 -13   12.53    0.50
   1   6  13   11.49    0.53
  -2  -6 -13    3.20    0.31
   2   6  13    3.24    0.32
  -3  -6 -13    0.15    0.11
   3   6  13    0.15    0.12
  -2   7  13    1.01    0.21
  -1   7  13    1.53    0.25
   0  -7 -13   -0.05    0.07
   0   7  13    0.06    0.10
  -1  -7 -13   26.85    0.77
   1   7  13   25.60    0.82
  -2  -7 -13    0.07    0.11
   2   7  13    0.04    0.10
  -3  -7 -13    0.14    0.14
   3   7  13    0.02    0.11
   2  -8 -13    3.31    0.21
   1  -8 -13    0.46    0.09
  -1   8  13    0.31    0.14
   0  -8 -13    2.69    0.18
   0   8  13    2.47    0.29
  -1  -8 -13    2.83    0.19
  -1  -8 -13    2.74    0.28
   1   8  13    3.19    0.33
  -2  -8 -13    1.78    0.25
  -2  -8 -13    1.86    0.18
   2   8  13    1.82    0.26
   3   8  13    0.09    0.13
   1  -9 -13    0.98    0.13
  -1   9  13    0.76    0.21
   0  -9 -13    0.34    0.09
   0   9  13    0.12    0.13
  -1  -9 -13    5.03    0.25
  -1  -9 -13    4.78    0.33
   1   9  13    4.49    0.35
  -2  -9 -13    0.03    0.07
  -2  -9 -13    0.17    0.12
   2   9  13   -0.01    0.10
  -3  -9 -13    0.92    0.15
   0 -10 -13    4.07    0.23
   0  10  13    3.97    0.41
  -1 -10 -13    2.50    0.19
   1  10  13    2.63    0.31
  -2 -10 -13    2.73    0.21
   2  10  13    2.40    0.29
  -1 -11 -13    0.07    0.12
   2  11  13    3.66    0.26
   2  11  13    3.31    0.44
  -1   0  14    1.15    0.22
  -1   1  14   -0.08    0.10
   0  -1 -14    1.52    0.22
   0   1  14    1.46    0.25
   1  -2 -14    1.26    0.19
  -1   2  14    1.09    0.21
   0  -2 -14    4.72    0.31
   0   2  14    4.20    0.35
  -1  -2 -14    0.08    0.09
   1   2  14    0.09    0.12
   1  -3 -14    0.02    0.09
  -1   3  14    0.09    0.12
   0  -3 -14    1.63    0.21
   0   3  14    1.11    0.22
  -1  -3 -14    0.56    0.15
   2   3  14    4.85    0.61
  -2   4  14   -0.02    0.10
   1  -4 -14   -0.09    0.08
  -1   4  14   -0.02    0.10
   0  -4 -14    6.60    0.37
   0   4  14    6.76    0.42
  -1  -4 -14    0.04    0.09
   1   4  14   -0.01    0.10
  -2  -4 -14    0.80    0.25
   2   4  14    0.30    0.15
  -2   5  14    0.05    0.18
   1  -5 -14    0.96    0.17
  -1   5  14    1.03    0.22
   0  -5 -14    1.38    0.20
   0   5  14    1.59    0.26
  -1  -5 -14    0.25    0.12
   1   5  14   -0.05    0.10
  -2  -5 -14    0.10    0.12
   2   5  14    0.58    0.18
  -1   6  14    8.03    0.46
   0  -6 -14    1.77    0.23
   0   6  14    2.28    0.29
  -1  -6 -14    0.57    0.15
   1   6  14    0.17    0.12
  -2  -6 -14    0.58    0.17
   2   6  14    0.37    0.15
   0  -7 -14    0.54    0.15
   0   7  14    0.46    0.16
  -1  -7 -14    0.35    0.13
   1   7  14    0.27    0.14
  -2  -7 -14    2.31    0.30
   2   7  14    2.10    0.28
   0   8  14   -0.03    0.15
  -1  -8 -14    8.90    0.45
   1   8  14    9.04    0.50
   2   8  14   11.05    0.63
   0  -9 -14    0.09    0.08
  -1  -9 -14    2.98    0.30
  -1  -9 -14    2.98    0.20
  -1 -10 -14    0.40    0.11
   0  -6 -15    0.57    0.19
   0  -7 -15    0.30    0.13
   0   0   0    0.00    0.00
;
_shelx_hkl_checksum   55897

_symmetry_cell_setting            Triclinic
_symmetry_space_group_name_H-M    P-1
_diffrn_radiation_source          ?
_diffrn_radiation_monochromator   ?
_publ_section_references
;Wakita, K. (2001). Yadokari-XG. Software for Crystal Structure Analyses.
Release of Software (Yadokari-XG 2009) for Crystal Structure Analyses,
Kabuto, C., Akine, S., Nemoto, T. & Kwon, E. (2009).
J. Cryst. Soc.  Jpn. 51, 218-224.
;
_chemical_absolute_configuration  ?
